# Supplementary material for: Highly stereoselective dearomative [3 + 2] cycloadditon of cyclic pyridinium ylides to access spiro-indolizidine scaffolds
Source: Royal Society of Chemistry journal article supplement (doi:10.1039/d1qo00886b), 2021-01-01

# Highly Stereoselective Dearomative [3+2] Cycloadditions of Cyclic Pyridinium Ylides to Access Spiroindolizidine Scaffolds

Xiao-Long He,<sup>a</sup> Cheng Wang,<sup>a</sup> You-Wu Wen,<sup>a</sup> Yi-Bing Zhao,<sup>a</sup> Huan Yang,<sup>c</sup> Shan Qian,<sup>a</sup> and Lingling Yang,<sup>\*a</sup> Zhouyu Wang<sup>\*b</sup>

<sup>a</sup> School of Food and Bioengineering, Xihua University, Chengdu 610039, China.

<sup>b</sup> School of Science, Xihua University, Chengdu 610039, China.

<sup>c</sup> The management commission of Yibin campus, Xihua University, Yibin 644000, China.

Fax: (+86)-28-8772-0552; E-mail: zhouyuwang77@163.com; yangll0808@sina.com.

## Supporting Information

|                                                                                                     |    |
|-----------------------------------------------------------------------------------------------------|----|
| 1. General Methods.....                                                                             | 2  |
| 2. Detailed screening conditions for the [3+2]cycloaddition.....                                    | 2  |
| 3. General procedure for the preparation of pyridinium salts.....                                   | 3  |
| 4. Procedure for the preparation of 3aa at a 1.0 mmol scale.....                                    | 7  |
| 5. General procedure for the [3+2] cycloaddition .....                                              | 7  |
| 6. The procedure of three-component one-pot sequential reaction .....                               | 19 |
| 7. Synthetic transformations .....                                                                  | 19 |
| 8. Attempts for the hydrogenation of the both C=C bond on the pyridine moiety with product 3ab..... | 26 |
| 10. NMR spectra .....                                                                               | 30 |

## 1. General Methods

NMR spectra were recorded with tetramethylsilane as the internal standard.  $^1\text{H}$ -NMR spectra were recorded at 400 MHz,  $^{13}\text{C}$ -NMR spectra were recorded at 100 MHz, and  $^{19}\text{F}$ -NMR spectra were recorded at 376 MHz. Chemical shifts were reported in ppm downfield from  $\text{CDCl}_3$  ( $\delta = 7.26$  ppm) or  $(\text{CD}_3)_2\text{SO}$  ( $\delta = 2.50$  ppm) for  $^1\text{H}$  NMR and relative to the central  $\text{CDCl}_3$  resonance ( $\delta = 77.0$  ppm) or  $(\text{CD}_3)_2\text{SO}$  resonance ( $\delta = 39.52$  ppm) for  $^{13}\text{C}$  NMR spectroscopy. Coupling constants are given in Hz. UV detection was monitored at 254 nm. TLC was performed on glass-backed silica plates. UV light and  $\text{I}_2$  were used to visualize products. Column chromatography was performed using silica gel (200–300 mesh) eluting with EtOAc/petroleum ether. Unless otherwise noted, commercial reagents were used as received and all reactions were carried out directly in air atmosphere. The nitroolefin **2** were obtained according to the literature procedures.<sup>[1]</sup>

## 2. Detailed screening conditions for the [3+2]cycloaddition

Table S1, Condition optimizations for [3+2] cycloaddition.<sup>a</sup>

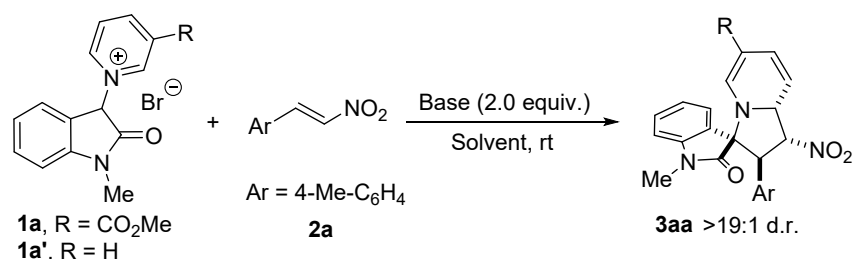

| Entry          | Base                     | Solvent               | t (min) | yield (%) <sup>b</sup> |
|----------------|--------------------------|-----------------------|---------|------------------------|
| 1              | $\text{Et}_3\text{N}$    | toluene               | 5       | 59                     |
| 2 <sup>c</sup> | $\text{Et}_3\text{N}$    | toluene               | 60      | n.r.                   |
| 3              | $\text{Et}_3\text{N}$    | THF                   | 20      | 82                     |
| 4              | $\text{Et}_3\text{N}$    | DCM                   | 5       | 90                     |
| 5              | $\text{Et}_3\text{N}$    | EtOH                  | 60      | 76                     |
| 6              | $\text{Et}_3\text{N}$    | $\text{CHCl}_3$       | 5       | 88                     |
| 7              | $\text{Et}_3\text{N}$    | $\text{Et}_2\text{O}$ | 120     | 90                     |
| 8              | $\text{Et}_3\text{N}$    | $\text{H}_2\text{O}$  | 5       | 59                     |
| 9              | DIPEA                    | DCM                   | 5       | 77                     |
| 10             | DBU                      | DCM                   | 5       | 79                     |
| 11             | $\text{Na}_2\text{CO}_3$ | DCM                   | 60      | 47                     |

|                       |                                |            |          |           |
|-----------------------|--------------------------------|------------|----------|-----------|
| 12                    | K <sub>2</sub> CO <sub>3</sub> | DCM        | 60       | 58        |
| 13 <sup>d</sup>       | Et <sub>3</sub> N              | DCM        | 60       | 25        |
| 14 <sup>e</sup>       | Et <sub>3</sub> N              | DCM        | 10       | 71        |
| 15 <sup>f</sup>       | Et <sub>3</sub> N              | DCM        | 5        | 69        |
| <b>16<sup>g</sup></b> | <b>Et<sub>3</sub>N</b>         | <b>DCM</b> | <b>5</b> | <b>90</b> |

<sup>a</sup> Unless noted otherwise, the reactions were carried out with **1a** (R = CO<sub>2</sub>Me, 0.03 mmol), **2a** (0.025 mmol), and base (0.05 mmol) in 0.5 mL of solvent at room temperature. <sup>b</sup> Isolated yield. <sup>c</sup> With **1a'** (R = H, 0.03 mmol). <sup>d</sup> With 0.025 mmol of Et<sub>3</sub>N. <sup>e</sup> With 0.03 mmol of Et<sub>3</sub>N. <sup>f</sup> With 0.075 mmol of Et<sub>3</sub>N. <sup>g</sup> At a 0.1 mmol (**2a**) scale.

### 3. General procedure for the preparation of pyridinium salts

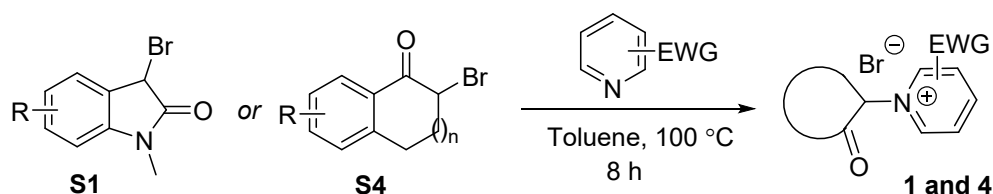

A solution of bromo-substrate **S1**<sup>[2]</sup> or **S4**<sup>[3]</sup> (1.0 equiv.) and pyridine derivative (1.5 equiv.) in anhydrous toluene under Ar atmosphere was stirred at 100 °C for about 8 hours. After that, the reaction mixture was cooled down to room temperature with generation of vast brown or yellow solid, filtered and washed with ethyl acetate to give the target pyridinium salt as a brown or yellow solid.

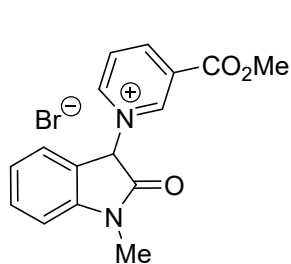

**Synthesis of 1a:** Following the general procedure, **1a** was obtained as a brown solid in 91% yield; Mp 268–270 °C; <sup>1</sup>H NMR (400 MHz, *d*<sub>6</sub>-DMSO): δ 9.59 (s, 1H), 9.17–9.12 (m, 2H), 8.39–8.36 (m, 1H), 7.59 (dd, *J* = 10.6, 4.0 Hz, 2H), 7.29 (d, *J* = 8.0 Hz, 1H), 7.23 (t, *J* = 7.4 Hz, 1H), 7.09 (s, 1H), 3.99 (s, 3H), 3.21 (s, 3H) ppm; <sup>13</sup>C NMR (101 MHz, *d*<sub>6</sub>-DMSO): δ 168.9, 162.0, 147.2, 146.9, 146.0, 145.1, 131.8, 130.0, 129.0, 126.1, 123.4, 120.6, 110.3, 68.9, 53.7, 27.1 ppm; ESI-HRMS: calcd. for C<sub>16</sub>H<sub>15</sub>N<sub>2</sub>O<sub>3</sub><sup>+</sup> 283.1077, found 283.1064.

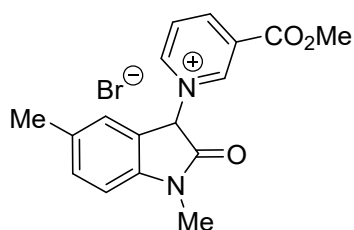

**Synthesis of 1b:** Following the general procedure, **1b** was obtained as a brown solid in 70% yield; Mp 152–154 °C; <sup>1</sup>H NMR (400 MHz, *d*<sub>6</sub>-DMSO): δ 9.61 (s, 1H), 9.14–9.12 (m, 2H), 8.38–8.35 (m, 1H), 7.40–7.38 (m, 2H), 7.17 (d, *J* = 8.2 Hz, 1H), 7.05 (s, 1H), 4.00 (s, 3H), 3.20 (s, 3H), 2.30 (s, 3H) ppm; <sup>13</sup>C NMR (100 MHz, *d*<sub>6</sub>-DMSO): δ 168.8, 161.9, 147.1, 146.8, 146.1,

142.6, 132.6, 131.9, 130.0, 129.0, 126.5, 120.7, 110.0, 69.0, 53.6, 27.1, 20.5 ppm; ESI-HRMS: calcd. for  $C_{17}H_{17}N_2O_3^+$  297.1234, found 297.1263.

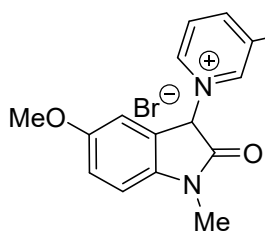

**Synthesis of 1c:** Following the general procedure, **1c** was obtained as a yellow solid in 52% yield; Mp 197–199 °C;  $^1H$  NMR (400 MHz,  $d_6$ -DMSO):  $\delta$  9.61 (s, 1H), 9.14–9.12 (m, 2H), 8.38–8.35 (m, 1H), 7.32 (d,  $J = 1.7$  Hz, 1H), 7.21 (d,  $J = 8.6$  Hz, 1H), 7.16–7.13 (m, 1H),

7.07 (s, 1H), 4.00 (s, 3H), 3.74 (s, 3H), 3.19 (s, 3H) ppm;  $^{13}C$  NMR (100 MHz,  $d_6$ -DMSO):  $\delta$  168.5, 161.9, 156.0, 147.1, 146.8, 146.1, 138.2, 130.0, 129.0, 121.6, 116.4, 113.0, 110.9, 69.1, 55.8, 53.6, 27.1 ppm; ESI-HRMS: calcd. for  $C_{17}H_{17}N_2O_4^+$  313.1183, found 313.1184.

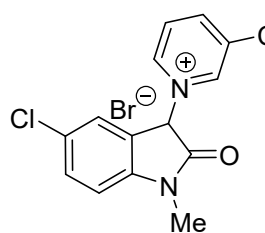

**Synthesis of 1d:** Following the general procedure, **1d** was obtained as a brown solid in 77% yield; Mp 276–278 °C;  $^1H$  NMR (400 MHz,  $d_6$ -DMSO):  $\delta$  9.65 (s, 1H), 9.18–9.13 (m, 2H), 8.38–8.35 (m, 1H), 7.74 (s, 1H), 7.65 (d,  $J = 8.4$  Hz, 1H), 7.31 (d,  $J = 8.4$  Hz, 1H), 7.12 (s, 1H),

4.01 (s, 3H), 3.21 (s, 3H) ppm;  $^{13}C$  NMR (100 MHz,  $d_6$ -DMSO):  $\delta$  168.7, 161.9, 147.3, 146.9, 146.4, 144.0, 131.5, 130.1, 129.0, 127.2, 126.2, 122.6, 111.7, 68.7, 53.6, 27.3 ppm; ESI-HRMS: calcd. for  $C_{16}H_{14}ClN_2O_3^+$  317.0687, found 317.0677.

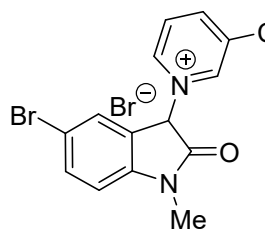

**Synthesis of 1e:** Following the general procedure, **1e** was obtained as a brown solid in 69% yield; Mp 282–284 °C;  $^1H$  NMR (400 MHz,  $d_6$ -DMSO):  $\delta$  9.66 (s, 1H), 9.19–9.13 (m, 2H), 8.39–8.35 (m, 1H), 7.86 (s, 1H), 7.77 (d,  $J = 8.4$  Hz, 1H), 7.26 (d,  $J = 8.4$  Hz, 1H), 7.15 (s, 1H),

4.01 (s, 3H), 3.21 (s, 3H) ppm;  $^{13}C$  NMR (100 MHz,  $d_6$ -DMSO):  $\delta$  168.7, 161.9, 147.3, 146.9, 146.4, 144.4, 134.3, 130.0, 129.0, 128.8, 123.0, 114.8, 112.2, 68.6, 53.6, 27.2 ppm; ESI-HRMS: calcd. for  $C_{16}H_{14}BrN_2O_3^+$  361.0182, found 361.0188.

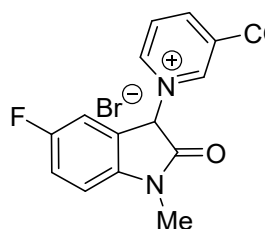

**Synthesis of 1f:** Following the general procedure, **1f** was obtained as a brown solid in 60% yield; Mp 262–264 °C;  $^1H$  NMR (400 MHz,  $d_6$ -DMSO):  $\delta$  9.64 (s, 1H), 9.20–9.13 (m, 2H), 8.40–8.36 (m, 1H), 7.61 (d,  $J = 6.9$  Hz, 1H), 7.48–7.43 (m, 1H), 7.33–7.30 (m, 1H), 7.18 (s, 1H),

4.00 (s, 3H), 3.21 (s, 3H) ppm;  $^{13}C$  NMR (100 MHz,  $d_6$ -DMSO):  $\delta$  168.8, 161.9, 158.5 (d,  $J_{C-F} = 237.7$  Hz), 147.3, 146.9, 146.2, 141.4, 130.0, 129.0, 122.0 (d,  $J_{C-F} = 9.4$  Hz), 118.1 (d,  $J_{C-F} = 23.4$  Hz), 114.2 (d,  $J_{C-F} = 26.3$  Hz), 111.4 (d,  $J_{C-F} = 8.3$  Hz), 68.8, 53.6, 27.3 ppm;  $^{19}F$  NMR (376 MHz,

$d_6$ -DMSO):  $\delta$  -119.38 – -119.44(m) ppm; ESI-HRMS: calcd. for  $C_{16}H_{14}FN_2O_3^+$  301.0983, found 301.0990.

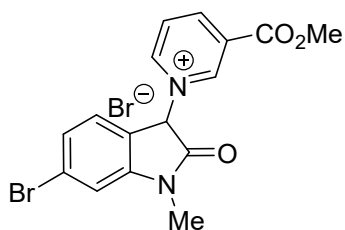

**Synthesis of 1g:** Following the general procedure, **1g** was obtained as a brown solid in 60% yield; Mp 285–287 °C;  $^1H$  NMR (400 MHz,  $d_6$ -DMSO):  $\delta$  9.60 (s, 1H), 9.17–9.12 (m, 2H), 8.38–8.35 (m, 1H), 7.59–7.53 (m, 2H), 7.43 (d,  $J$  = 7.5 Hz, 1H), 7.04 (s, 1H), 4.00 (s, 3H), 3.21

(s, 3H) ppm;  $^{13}C$  NMR (100 MHz,  $d_6$ -DMSO):  $\delta$  169.0, 161.9, 147.3, 146.9, 146.8, 146.1, 129.9, 128.9, 127.8, 125.9, 124.8, 119.9, 113.6, 68.5, 53.6, 27.3 ppm; ESI-HRMS: calcd. for  $C_{16}H_{14}BrN_2O_3^+$  361.0182, found 361.0178.

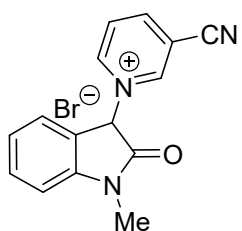

**Synthesis of 1h:** Following the general procedure, **1h** was obtained as a yellow solid in 73% yield; Mp 251–253 °C;  $^1H$  NMR (400 MHz,  $d_6$ -DMSO):  $\delta$  9.74 (s, 1H), 9.38 (d,  $J$  = 5.8 Hz, 1H), 9.24 (d,  $J$  = 7.9 Hz, 1H), 8.50–8.46 (m, 1H), 7.61–7.56 (m, 2H), 7.29–7.20 (m, 2H), 6.97 (s, 1H), 3.21 (s, 3H) ppm;  $^{13}C$

NMR (100 MHz,  $d_6$ -DMSO):  $\delta$  168.5, 150.3, 148.3, 148.2, 145.1, 131.8, 128.9, 126.4, 123.4, 120.4, 113.6, 113.4, 110.1, 69.2, 27.1 ppm; ESI-HRMS: calcd. for  $C_{15}H_{12}N_3O^+$  250.0975, found 250.0980.

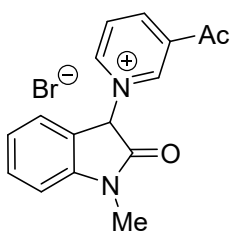

**Synthesis of 1i:** Following the general procedure, **1i** was obtained as a brown solid in 81% yield; Mp 274–276 °C;  $^1H$  NMR (400 MHz,  $d_6$ -DMSO):  $\delta$  9.63 (s, 1H), 9.19 (d,  $J$  = 8.1 Hz, 1H), 9.10 (d,  $J$  = 6.2 Hz, 1H), 8.40–8.36 (m, 1H), 7.61–7.57 (m 2H), 7.29 (d,  $J$  = 7.8 Hz, 1H), 7.24–7.20 (m, 1H), 7.07 (s, 1H),

3.23 (s, 3H), 2.77 (s, 3H) ppm;  $^{13}C$  NMR (100 MHz,  $d_6$ -DMSO)  $\delta$  194.0, 169.0, 146.4, 146.0, 145.5, 145.0, 135.6, 131.7, 128.8, 125.9, 123.3, 120.9, 110.2, 69.0, 27.3, 27.1 ppm; ESI-HRMS: calcd. for  $C_{16}H_{15}N_2O_2^+$  267.1128, found 267.1130.

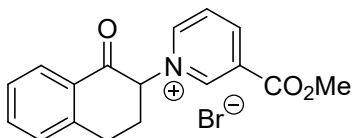

**Synthesis of 4a:** Following the general procedure, **4a** was obtained as a brown solid in 61% yield; Mp 172–174 °C;  $^1H$  NMR (400 MHz,  $D_2O$ ):  $\delta$  9.50 (s, 1H), 9.25–9.22 (m, 1H), 9.19–9.17(m, 1H), 8.43–8.40

(m, 1H), 8.04–8.02 (m, 1H), 7.80–7.76 (m, 1H), 7.56–7.49 (m, 2H), 6.24 (dd,  $J$  = 14.0, 4.6 Hz, 1H), 4.12 (s, 3H), 3.60–3.51 (m, 1H), 3.47–3.40 (m, 1H), 3.14–3.03 (m, 1H), 2.97–2.91 (m, 1H) ppm;  $^{13}C$  NMR (100 MHz,  $D_2O$ ):  $\delta$  192.1, 163.2, 147.7, 146.9, 145.9, 144.3, 136.0, 130.8, 130.0, 129.5, 128.6, 127.8, 127.5, 76.2, 54.0, 29.6, 27.9 ppm; ESI-HRMS: calcd. for  $C_{17}H_{16}NO_3^+$  282.1125, found 282.1125.

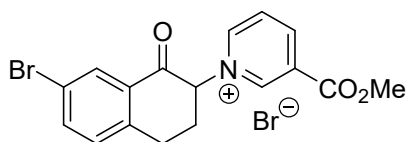

**Synthesis of 4b:** Following the general procedure, **4b** was obtained as a yellow solid in 33% yield; Mp 224–226 °C; <sup>1</sup>H NMR (400 MHz, D<sub>2</sub>O): δ 9.49 (s, 1H), 9.24 (d, *J* = 7.3 Hz, 1H),

9.15 (s, 1H), 8.41 (s, 1H), 8.15 (s, 1H), 7.88 (d, *J* = 8.2 Hz, 1H), 7.48 (d, *J* = 7.7 Hz, 1H), 6.23 (d, *J* = 13.9 Hz, 1H), 4.12 (s, 3H), 3.54–3.40 (m, 2H), 3.14–3.05 (m, 1H), 2.94–2.91 (m, 1H) ppm; <sup>13</sup>C NMR (100 MHz, D<sub>2</sub>O): δ 190.9, 163.2, 147.7, 147.0, 145.9, 143.2, 138.3, 131.5, 131.4, 130.8, 130.1, 128.6, 120.6, 75.9, 54.0, 29.2, 27.5 ppm; ESI-HRMS: calcd. for C<sub>17</sub>H<sub>15</sub>BrNO<sub>3</sub><sup>+</sup> 360.0230, found 360.0256.

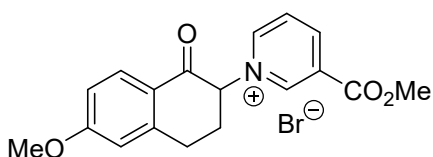

**Synthesis of 4c:** Following the general procedure, **4c** was obtained as a yellow solid in 74% yield; Mp 156–158 °C; <sup>1</sup>H NMR (400 MHz, D<sub>2</sub>O): δ 9.48 (s, 1H), 9.23 (d, *J* = 7.8 Hz, 1H),

9.14 (d, *J* = 5.6 Hz, 1H), 8.41–8.37 (m 1H), 8.02 (d, *J* = 8.9 Hz, 1H), 7.04 (s, 2H), 6.14–6.11 (m, 1H), 4.11 (s, 3H), 3.99 (s, 3H), 3.53–3.36 (m, 2H), 3.08–2.91 (m, 2H) ppm; <sup>13</sup>C NMR (100 MHz, D<sub>2</sub>O): δ 190.5, 165.1, 163.2, 147.7, 147.4, 146.8, 145.9, 130.7, 130.5, 128.5, 123.4, 114.5, 113.1, 76.0, 55.9, 54.0, 29.6, 28.1 ppm; ESI-HRMS: calcd. for C<sub>18</sub>H<sub>18</sub>NO<sub>4</sub><sup>+</sup> 312.1230, found 312.1202.

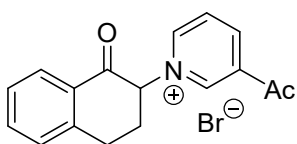

**Synthesis of 4d:** Following the general procedure, **4d** was obtained as a brown solid in 74% yield; Mp 187–189 °C; <sup>1</sup>H NMR (400 MHz, D<sub>2</sub>O): δ 9.44 (s, 1H), 9.23 (d, *J* = 8.2 Hz, 1H), 9.15 (d, *J* = 6.2 Hz, 1H), 8.44–8.41

(m, 1H), 8.04 (dd, *J* = 7.9, 0.8 Hz, 1H), 7.80–7.76 (m, 1H), 7.56–7.49 (m, 2H), 6.25 (dd, *J* = 14.0, 4.6 Hz, 1H), 3.60–3.52 (m, 1H), 3.47–3.41 (m, 1H), 3.15–3.04 (m, 1H), 2.97–2.92 (m, 1H), 2.87 (s, 3H) ppm; <sup>13</sup>C NMR (100 MHz, D<sub>2</sub>O): δ 196.4, 192.2, 147.2, 145.9, 145.2, 144.3, 136.0, 135.9, 130.0, 129.5, 128.7, 127.8, 127.5, 76.2, 29.7, 28.0, 26.7 ppm; ESI-HRMS: calcd. for C<sub>17</sub>H<sub>16</sub>NO<sub>2</sub><sup>+</sup> 266.1176, found 266.1183.

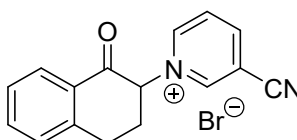

**Synthesis of 4e:** Following the general procedure, **4e** was obtained as a brown solid in 39% yield; Mp 168–169 °C; <sup>1</sup>H NMR (400 MHz, D<sub>2</sub>O): δ 9.60 (s, 1H), 9.29–9.27 (m, 1H), 9.18–9.15 (m, 1H), 8.51–8.47 (m, 1H),

8.08–8.06 (m, 1H), 7.81–7.77 (m, 1H), 7.57–7.51 (m, 2H), 6.28 (dd, *J* = 13.9, 4.6 Hz, 1H), 3.61–3.52 (m, 1H), 3.48–3.42 (m, 1H), 3.12–2.93 (m, 2H) ppm; <sup>13</sup>C NMR (100 MHz, D<sub>2</sub>O): δ 191.6, 150.1, 148.5, 148.4, 144.3, 136.1, 129.9, 129.5, 129.0, 127.9, 127.5, 114.1, 113.3, 76.5, 29.5, 27.9 ppm; ESI-HRMS: calcd. for C<sub>16</sub>H<sub>13</sub>N<sub>2</sub>O<sup>+</sup> 249.1022, found 249.1033.

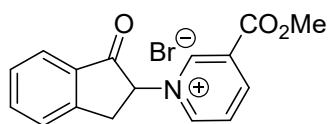

**Synthesis of 4f:** Following the general procedure, **4f** was obtained as a yellow solid in 45% yield; Mp 235–238 °C; <sup>1</sup>H NMR (400 MHz, *d*<sub>6</sub>-DMSO): δ 9.77 (s, 1H), 9.44 (d, *J* = 6.2 Hz, 1H), 9.11 (d, *J* = 8.1 Hz, 1H), 8.42–8.38 (m, 1H), 7.90–7.84 (m, 2H), 7.76 (d, *J* = 7.7 Hz, 1H), 7.63–7.59 (m, 1H), 6.50–6.46 (m, 1H), 4.08–4.02 (m, 1H), 3.99 (s, 3H), 3.84–3.78 (m, 1H) ppm; <sup>13</sup>C NMR (100 MHz, *d*<sub>6</sub>-DMSO): δ 196.9, 162.0, 150.7, 147.9, 146.5, 146.4, 136.7, 132.9, 130.0, 128.8, 128.7, 127.0, 124.3, 73.7, 53.5, 34.1 ppm; ESI-HRMS: calcd. for C<sub>16</sub>H<sub>14</sub>NO<sub>3</sub><sup>+</sup> 268.0968, found 268.0969.

#### 4. Procedure for the preparation of 3aa at a 1.0 mmol scale

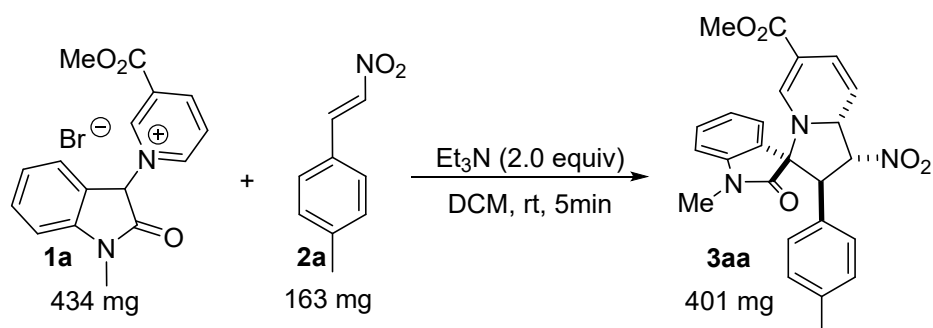

To the solution of pyridinium salt **1a** (434 mg, 1.2 mmol) and nitroolefin **2a** (163 mg, 1.0 mmol) in DCM (10.0 mL) was added Et<sub>3</sub>N (202 mg, 2.0 mmol) and stirred at room temperature for 30 minutes. Upon workup, solvent was evaporated under reduced pressure, product **3aa** was obtained by flash chromatography (EtOAc/petroleum ether = 1/4) as a yellow solid (401 mg, 90% yield, > 19:1 d.r.).

#### 5. General procedure for the [3+2] cycloaddition

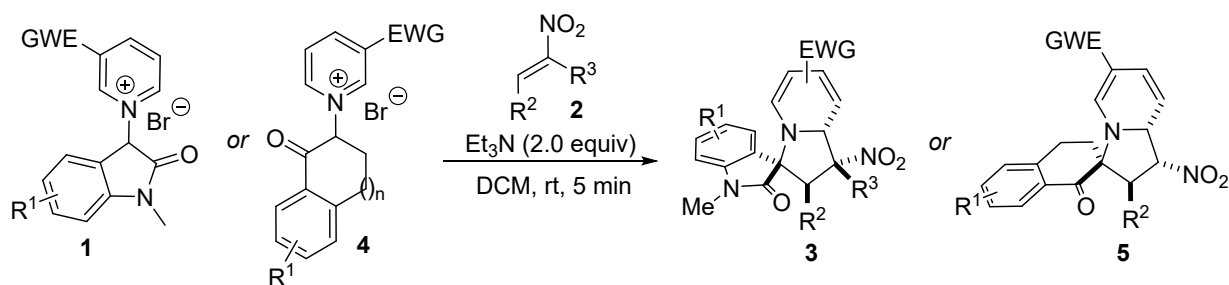

The reaction was carried out with pyridinium salts **1** or **4** (0.12 mmol), nitroolefins **2** (0.1 mmol), and Et<sub>3</sub>N (0.2 mmol) in DCM (2.0 mL) at room temperature for about 5 minutes. After completion, the solution was purified by flash chromatography to afford the product **3** or **5**.

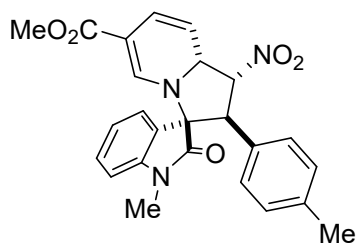

**Synthesis of 3aa:** pyridinium salt **1a** (36.2 mg, 0.10 mmol) and nitroolefin **2a** (19.6 mg, 0.12 mmol) were dissolved in DCM (2.0 mL), Et<sub>3</sub>N was added and stirred at room temperature for 5 minutes. Upon workup, product **3aa** was obtained by flash chromatography (EtOAc/petroleum ether = 1/4) as a yellow solid (40 mg) in 90% yield;

Mp 90–91 °C; <sup>1</sup>H NMR (400 MHz, CDCl<sub>3</sub>): δ 7.53 (d, *J* = 7.4 Hz, 1H), 7.42–7.39 (m, 1H), 7.25–7.23 (m, 1H), 6.99 (s, 1H), 6.95 (d, *J* = 8.0 Hz, 2H), 6.84 (d, *J* = 8.0 Hz, 2H), 6.72 (d, *J* = 7.8 Hz, 1H), 6.59 (d, *J* = 10.1 Hz, 1H), 6.10–6.02 (m, 2H), 4.96 (dd, *J* = 10.2, 0.9 Hz, 1H), 4.36 (d, *J* = 6.8 Hz, 1H), 3.62 (s, 3H), 2.85 (s, 3H), 2.22 (s, 3H) ppm; <sup>13</sup>C NMR (100 MHz, CDCl<sub>3</sub>): δ 173.8, 166.3, 144.6, 139.3, 138.5, 131.4, 129.3, 128.2, 128.1, 125.1, 124.9, 124.0, 122.4, 109.2, 106.6, 100.5, 92.9, 75.0, 61.2, 57.1, 50.9, 25.7, 21.0 ppm; ESI-HRMS: calcd. for C<sub>25</sub>H<sub>23</sub>N<sub>3</sub>O<sub>5</sub> + H<sup>+</sup> 446.1710, found 446.1707.

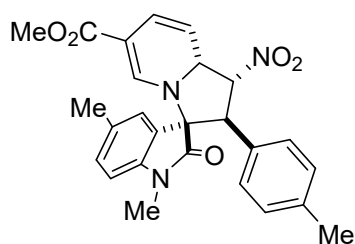

**Synthesis of 3ba:** pyridinium salt **1b** (37.6 mg, 0.10 mmol) and nitroolefin **2a** (19.6 mg, 0.12 mmol) were dissolved in DCM (2.0 mL), Et<sub>3</sub>N was added and stirred at room temperature for 5 minutes. Upon workup, product **3ba** was obtained by flash chromatography (EtOAc/petroleum ether = 1/4) as a yellow solid

(43 mg) in 93% yield; Mp 114–116 °C; <sup>1</sup>H NMR (400 MHz, CDCl<sub>3</sub>): δ 7.33 (s, 1H), 7.19 (d, *J* = 7.8 Hz, 1H), 6.99–6.95 (m, 3H), 6.84 (d, *J* = 7.4 Hz, 2H), 6.62–6.58 (m, 2H), 6.08–6.01 (m, 2H), 4.96 (d, *J* = 10.1 Hz, 1H), 4.35 (d, *J* = 6.5 Hz, 1H), 3.63 (s, 3H), 2.82 (s, 3H), 2.43 (s, 3H), 2.23 (s, 3H) ppm; <sup>13</sup>C NMR (100 MHz, CDCl<sub>3</sub>): δ 173.6, 166.1, 142.1, 139.3, 138.2, 133.6, 131.6, 129.0, 128.0, 128.0, 125.4, 124.7, 122.3, 108.7, 106.3, 100.4, 92.7, 74.8, 61.0, 56.9, 50.7, 25.5, 21.0, 20.8 ppm; ESI-HRMS: calcd. for C<sub>26</sub>H<sub>25</sub>N<sub>3</sub>O<sub>5</sub> + H<sup>+</sup> 460.1867, found 460.1857.

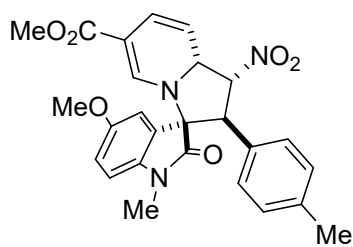

**Synthesis of 3ca:** pyridinium salt **1c** (39.2 mg, 0.10 mmol) and nitroolefin **2a** (19.6 mg, 0.12 mmol) were dissolved in DCM (2.0 mL), Et<sub>3</sub>N was added and stirred at room temperature for 5 minutes. Upon workup, product **3ca** was obtained by flash chromatography (EtOAc/petroleum ether = 1/4) as a yellow solid (41 mg) in 86% yield;

Mp 119–121 °C; <sup>1</sup>H NMR (400 MHz, CDCl<sub>3</sub>): δ 7.10 (s, 1H), 7.00–6.85 (m, 6H), 6.65–6.58 (m, 2H), 6.05–6.03 (m, 2H), 4.96 (d, *J* = 9.8 Hz, 1H), 4.34 (d, *J* = 6.0 Hz, 1H), 3.86 (s, 3H), 3.64 (s, 3H), 2.82 (s, 3H), 2.23 (s, 3H) ppm; <sup>13</sup>C NMR (100 MHz, CDCl<sub>3</sub>): δ 173.6, 166.3, 156.9, 139.3, 138.5,



137.9, 129.3, 128.2, 128.1, 124.9, 123.6, 116.0, 111.7, 109.8, 106.6, 100.8, 92.8, 75.1, 61.1, 57.2, 56.0, 51.0, 25.8, 21.0 ppm; ESI-HRMS: calcd. for  $C_{26}H_{25}N_3O_6 + H^+$  476.1816, found 476.1802.

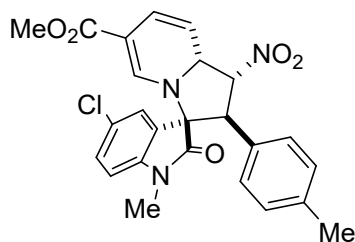

**Synthesis of 3da:** pyridinium salt **1d** (39.6 mg, 0.10 mmol) and nitroolefin **2a** (19.6 mg, 0.12 mmol) were dissolved in DCM (2.0 mL),  $Et_3N$  was added and stirred at room temperature for 5 minutes. Upon workup, product **3da** was obtained by flash chromatography

(EtOAc/petroleum ether = 1/4) as a yellow solid (44 mg) in 92% yield; Mp 164–166 °C;  $^1H$  NMR (400 MHz,  $CDCl_3$ ):  $\delta$  7.31 (dd,  $J = 7.3, 2.6$  Hz, 1H), 7.12 (td,  $J = 8.7, 2.6$  Hz, 1H), 6.99 (s, 1H), 6.96 (d,  $J = 4.4$  Hz, 2H), 6.86 (d,  $J = 8.2$  Hz, 2H), 6.68–6.65 (m, 1H), 6.61–6.58 (m, 1H), 6.06–6.00 (m, 2H), 4.99–4.96 (m, 1H), 4.34 (d,  $J = 6.5$  Hz, 1H), 3.65 (s, 3H), 2.84 (s, 3H), 2.24 (s, 3H) ppm;  $^{13}C$  NMR (100 MHz,  $CDCl_3$ ):  $\delta$  173.8, 166.2, 138.9, 138.7, 129.4, 128.2, 127.9, 124.9, 118.1, 117.9, 113.3, 113.0, 110.0, 109.9, 106.8, 101.4, 92.6, 74.9, 61.3, 57.4, 51.0, 25.9, 21.0 ppm; ESI-HRMS: calcd. for  $C_{25}H_{22}ClN_3O_5 + H^+$  480.1321, found 480.1308.

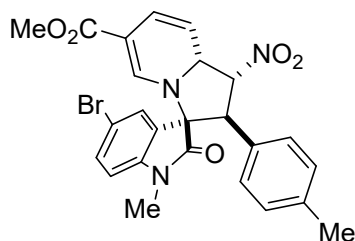

**Synthesis of 3ea:** pyridinium salt **1e** (44.0 mg, 0.10 mmol) and nitroolefin **2a** (19.6 mg, 0.12 mmol) were dissolved in DCM (2.0 mL),  $Et_3N$  was added and stirred at room temperature for 5 minutes. Upon workup, product **3ea** was obtained by flash chromatography

(EtOAc/petroleum ether = 1/4) as a yellow solid (48 mg) in 92% yield; Mp 172–173 °C;  $^1H$  NMR (400 MHz,  $CDCl_3$ ):  $\delta$  7.65 (d,  $J = 1.5$  Hz, 1H), 7.54 (dd,  $J = 8.3, 1.5$  Hz, 1H), 6.98 (d,  $J = 7.9$  Hz, 2H), 6.94 (s, 1H), 6.85 (d,  $J = 8.0$  Hz, 2H), 6.60 (t,  $J = 8.7$  Hz, 2H), 6.04–5.98 (m, 2H), 4.98 (d,  $J = 10.2$  Hz, 1H), 4.35 (d,  $J = 6.3$  Hz, 1H), 3.65 (s, 3H), 2.83 (s, 3H), 2.24 (s, 3H) ppm;  $^{13}C$  NMR (100 MHz,  $CDCl_3$ ):  $\delta$  173.5, 166.1, 143.7, 138.9, 138.8, 134.4, 129.4, 128.2, 128.0, 127.8, 125.0, 124.7, 116.5, 110.6, 106.8, 101.6, 92.5, 74.6, 61.3, 57.4, 51.1, 25.9, 21.0 ppm; ESI-HRMS: calcd. for  $C_{25}H_{22}BrN_3O_5 + H^+$  524.0816, found 524.0810.

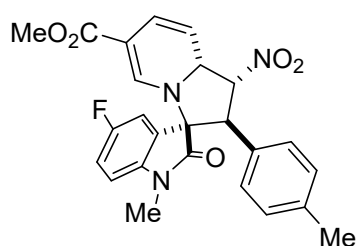

**Synthesis of 3fa:** pyridinium salt **1f** (38.0 mg, 0.10 mmol) and nitroolefin **2a** (19.6 mg, 0.12 mmol) were dissolved in DCM (2.0 mL),  $Et_3N$  was added and stirred at room temperature for 5 minutes. Upon workup, product **3fa** was obtained by flash chromatography

(EtOAc/petroleum ether = 1/4) as a yellow solid (38 mg) in 82% yield; Mp 150–152 °C;  $^1H$  NMR (400 MHz,  $CDCl_3$ ):  $\delta$  7.31 (dd,  $J = 7.3, 2.5$  Hz, 1H), 7.12 (td,  $J = 8.7, 2.6$

Hz, 1H), 6.99–6.96 (m, 3H), 6.87–6.85 (m, 2H), 6.69–6.66 (m, 1H), 6.62–6.58 (m, 1H), 6.06–6.00 (m, 2H), 4.98 (d,  $J = 10.1$  Hz, 1H), 4.34 (d,  $J = 6.5$  Hz, 1H), 3.64 (s, 3H), 2.84 (s, 3H), 2.24 (s, 3H) ppm;  $^{13}\text{C}$  NMR (100 MHz,  $\text{CDCl}_3$ ):  $\delta$  173.7, 166.1, 159.6 (d,  $J_{\text{C-F}} = 243.0$  Hz), 140.6 (d,  $J_{\text{C-F}} = 2.2$  Hz), 138.9, 138.7, 129.4, 128.2, 127.9, 124.9, 124.2 (d,  $J_{\text{C-F}} = 7.6$  Hz), 118.0 (d,  $J_{\text{C-F}} = 23.3$ ), 113.1 (d,  $J_{\text{C-F}} = 25.0$  Hz), 110.0 (d,  $J_{\text{C-F}} = 7.9$  Hz), 106.8, 101.4, 92.6, 74.9, 61.3, 57.4, 51.0, 25.9, 21.0 ppm;  $^{19}\text{F}$  NMR (376 MHz,  $\text{CDCl}_3$ ):  $\delta$  -117.09 – -117.04(m) ppm ESI-HRMS: calcd. for  $\text{C}_{25}\text{H}_{22}\text{FN}_3\text{O}_5 + \text{Na}^+$  486.1436, found 486.1427

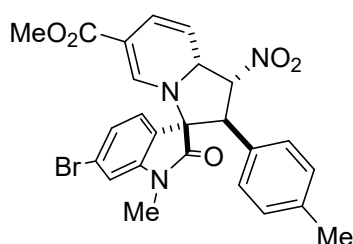

**Synthesis of 3ga:** pyridinium salt **1g** (44.0 mg, 0.10 mmol) and nitroolefin **2a** (19.6 mg, 0.12 mmol) were dissolved in DCM (2.0 mL),  $\text{Et}_3\text{N}$  was added and stirred at room temperature for 5 minutes. Upon workup, product **3ga** was obtained by flash chromatography (EtOAc/petroleum ether = 1/4) as a yellow solid (40 mg) in 76% yield;

Mp 173–176 °C;  $^1\text{H}$  NMR (400 MHz,  $\text{CDCl}_3$ ):  $\delta$  7.40 (s, 2H), 6.98 (d,  $J = 7.9$  Hz, 2H), 6.91 (d,  $J = 16.4$  Hz, 2H), 6.84 (d,  $J = 8.1$  Hz, 2H), 6.59 (d,  $J = 10.1$  Hz, 1H), 6.07–5.99 (m, 2H), 4.98 (dd,  $J = 10.1, 1.0$  Hz, 1H), 4.33 (d,  $J = 6.7$  Hz, 1H), 3.64 (s, 3H), 2.84 (s, 3H), 2.25 (s, 3H) ppm;  $^{13}\text{C}$  NMR (100 MHz,  $\text{CDCl}_3$ ):  $\delta$  173.7, 166.2, 145.8, 138.9, 138.8, 129.5, 128.2, 127.8, 126.9, 126.4, 125.4, 124.9, 121.4, 112.8, 106.8, 101.0, 92.8, 74.6, 61.3, 57.0, 51.0, 25.9, 21.0 ppm; ESI-HRMS: calcd. for  $\text{C}_{25}\text{H}_{22}\text{BrN}_3\text{O}_5 + \text{H}^+$  524.0816, found 524.0808.

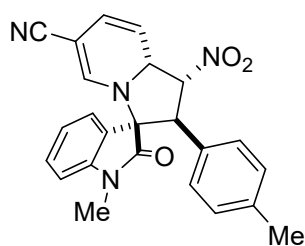

**Synthesis of 3ha:** pyridinium salt **1h** (32.9 mg, 0.10 mmol) and nitroolefin **2a** (19.6 mg, 0.12 mmol) were dissolved in DCM (2.0 mL),  $\text{Et}_3\text{N}$  was added and stirred at room temperature for 5 minutes. Upon workup, product **3ha** was obtained by flash chromatography (EtOAc/petroleum ether = 1/4) as a yellow solid (39 mg) in 95% yield;

Mp 99–102 °C;  $^1\text{H}$  NMR (400 MHz,  $\text{CDCl}_3$ ):  $\delta$  7.53 (d,  $J = 7.3$  Hz, 1H), 7.44 (t,  $J = 7.5$  Hz, 1H), 7.30–7.26 (m, 1H), 6.96 (d,  $J = 7.5$  Hz, 2H), 6.84 (d,  $J = 7.6$  Hz, 2H), 6.74 (d,  $J = 7.7$  Hz, 1H), 6.54 (s, 1H), 6.09–6.04 (m, 3H), 5.01 (d,  $J = 10.7$  Hz, 1H), 4.34 (d,  $J = 6.6$  Hz, 1H), 2.86 (s, 3H), 2.23 (s, 3H) ppm;  $^{13}\text{C}$  NMR (100 MHz,  $\text{CDCl}_3$ ):  $\delta$  173.4, 144.6, 140.9, 138.7, 131.8, 129.4, 128.2, 127.6, 125.1, 124.1, 124.0, 121.6, 119.4, 109.4, 108.5, 92.8, 80.6, 74.9, 60.5, 56.6, 25.8, 21.0 ppm; ESI-HRMS: calcd. for  $\text{C}_{24}\text{H}_{20}\text{N}_4\text{O}_3 + \text{H}^+$  413.1608, found 413.1610.

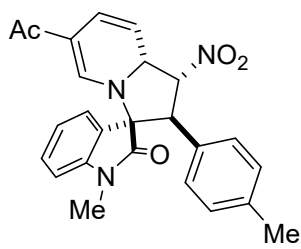

**Synthesis of 3ia:** pyridinium salt **1i** (34.6 mg, 0.10 mmol) and nitroolefin **2a** (19.6 mg, 0.12 mmol) were dissolved in DCM (2.0 mL), Et<sub>3</sub>N was added and stirred at room temperature for 5 minutes. Upon workup, product **3ia** was obtained by flash chromatography (EtOAc/petroleum ether = 1/4) as a yellow solid (41 mg) in 96% yield; Mp 96–99 °C; <sup>1</sup>H

NMR (400 MHz, CDCl<sub>3</sub>): δ 7.54 (d, *J* = 7.4 Hz, 1H), 7.45–7.23 (m, 1H), 7.27–7.26 (m, 1H), 6.97–6.95 (m, 3H), 6.84 (d, *J* = 8.1 Hz, 2H), 6.76–6.70 (m, 2H), 6.12–6.09 (m, 1H), 6.05–6.02 (m, 1H), 5.05 (dd, *J* = 10.2, 1.4 Hz, 1H), 4.37 (d, *J* = 6.9 Hz, 1H), 2.86 (s, 3H), 2.23 (s, 3H), 2.03 (s, 3H) ppm; <sup>13</sup>C NMR (100 MHz, CDCl<sub>3</sub>): δ 192.0, 173.7, 144.7, 139.8, 138.6, 131.6, 129.3, 128.2, 128.0, 125.1, 124.6, 124.0, 122.3, 111.0, 109.4, 107.4, 92.8, 75.2, 61.3, 57.2, 25.8, 24.7, 21.0 ppm; ESI-HRMS: calcd. for C<sub>25</sub>H<sub>23</sub>N<sub>3</sub>O<sub>4</sub> + H<sup>+</sup> 430.1761, found 430.1752.

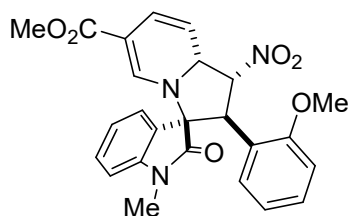

**Synthesis of 3ab:** pyridinium salt **1a** (36.2 mg, 0.10 mmol) and nitroolefin **2b** (21.5 mg, 0.12 mmol) were dissolved in DCM (2.0 mL), Et<sub>3</sub>N was added and stirred at room temperature for 5 minutes. Upon workup, product **3ab** was obtained by flash chromatography

(EtOAc/petroleum ether = 1/4) as a yellow solid (44 mg) in 95% yield; Mp 157–158 °C; <sup>1</sup>H NMR (400 MHz, CDCl<sub>3</sub>): δ 7.62 (d, *J* = 7.3 Hz, 1H), 7.38–7.34 (m, 1H), 7.23–7.14 (m, 3H), 7.00 (s, 1H), 6.85 (t, *J* = 7.4 Hz, 1H), 6.71 (d, *J* = 7.8 Hz, 1H), 6.62 (d, *J* = 8.1 Hz, 1H), 6.60–6.57 (m, 1H), 6.13 (dt, *J* = 7.2, 1.9 Hz, 1H), 5.98–5.92 (m, 1H), 5.09 (d, *J* = 5.8 Hz, 1H), 5.03 (dd, *J* = 10.2, 1.4 Hz, 1H), 3.61 (s, 3H), 3.34 (s, 3H), 2.84 (s, 3H) ppm; <sup>13</sup>C NMR (100 MHz, CDCl<sub>3</sub>): δ 174.1, 166.3, 157.4, 144.5, 139.6, 130.8, 129.6, 128.9, 126.1, 124.9, 123.4, 123.1, 120.6, 120.5, 110.4, 108.6, 106.8, 99.7, 93.5, 74.7, 62.3, 54.9, 50.9, 49.3, 25.7 ppm; ESI-HRMS: calcd. for C<sub>25</sub>H<sub>23</sub>N<sub>3</sub>O<sub>6</sub> + H<sup>+</sup> 462.1660, found 462.1659.

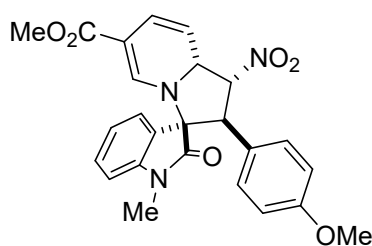

**Synthesis of 3ac:** pyridinium salt **1a** (36.2 mg, 0.10 mmol) and nitroolefin **2c** (21.5 mg, 0.12 mmol) were dissolved in DCM (2.0 mL), Et<sub>3</sub>N was added and stirred at room temperature for 5 minutes. Upon workup, product **3ac** was obtained by flash chromatography (EtOAc/petroleum ether = 1/4) as a yellow solid (42 mg) in 91%

yield; Mp 158–162 °C; <sup>1</sup>H NMR (400 MHz, CDCl<sub>3</sub>): δ 7.51 (d, *J* = 7.3 Hz, 1H), 7.40 (t, *J* = 7.6 Hz, 1H), 7.23 (d, *J* = 7.4 Hz, 1H), 6.99 (s, 1H), 6.88 (d, *J* = 8.1 Hz, 2H), 6.73–6.66 (m, 3H), 6.59 (d, *J* =

10.0 Hz, 1H), 6.08–6.00 (m, 2H), 4.95 (d,  $J = 10.1$  Hz, 1H), 4.34 (d,  $J = 6.8$  Hz, 1H), 3.70 (s, 3H), 3.62 (s, 3H), 2.86 (s, 3H) ppm;  $^{13}\text{C}$  NMR (100 MHz,  $\text{CDCl}_3$ ):  $\delta$  173.9, 166.2, 159.7, 144.6, 139.3, 131.4, 129.5, 125.1, 124.9, 124.0, 122.9, 122.4, 114.0, 109.2, 106.6, 100.6, 93.0, 75.0, 61.0, 56.9, 55.1, 50.9, 25.8 ppm; ESI-HRMS: calcd. for  $\text{C}_{25}\text{H}_{23}\text{N}_3\text{O}_6 + \text{H}^+$  462.1660, found 462.1665.

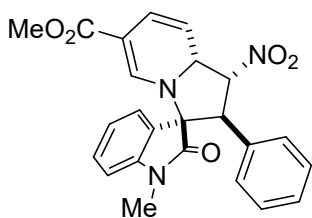

**Synthesis of 3ad:** pyridinium salt **1a** (36.2 mg, 0.10 mmol) and nitroolefin **2d** (17.9 mg, 0.12 mmol) were dissolved in DCM (2.0 mL),  $\text{Et}_3\text{N}$  was added and stirred at room temperature for 5 minutes. Upon workup, product **3ad** was obtained by flash chromatography (EtOAc/petroleum ether = 1/4) as a yellow solid (35 mg) in 82% yield; Mp 74–76 °C;  $^1\text{H}$  NMR (400 MHz,  $\text{CDCl}_3$ ):  $\delta$  7.54 (d,  $J = 7.4$  Hz, 1H), 7.42–7.39 (m, 1H), 7.27–7.23 (m, 1H), 7.20–7.13 (m, 3H), 7.01 (s, 1H), 6.96–6.94 (m, 2H), 6.71 (d,  $J = 7.8$  Hz, 1H), 6.60 (d,  $J = 10.1$  Hz, 1H), 6.12–6.05 (m, 2H), 4.98 (d,  $J = 10.1$  Hz, 1H), 4.40 (d,  $J = 6.6$  Hz, 1H), 3.62 (s, 3H), 2.82 (s, 3H) ppm;  $^{13}\text{C}$  NMR (100 MHz,  $\text{CDCl}_3$ ):  $\delta$  173.7, 166.2, 144.6, 139.3, 131.5, 131.2, 128.6, 128.6, 128.3, 125.1, 124.9, 124.0, 122.3, 109.2, 106.6, 100.6, 92.7, 75.1, 61.3, 57.4, 50.9, 25.7 ppm; ESI-HRMS: calcd. for  $\text{C}_{24}\text{H}_{21}\text{N}_3\text{O}_5 + \text{H}^+$  432.1554, found 432.1561.

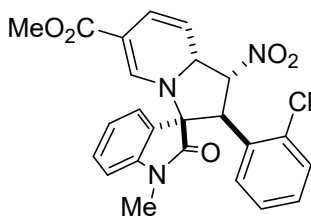

**Synthesis of 3ae:** pyridinium salt **1a** (36.2 mg, 0.10 mmol) and nitroolefin **2e** (22.0 mg, 0.12 mmol) were dissolved in DCM (2.0 mL),  $\text{Et}_3\text{N}$  was added and stirred at room temperature for 5 minutes. Upon workup, product **3ae** was obtained by flash chromatography (EtOAc/petroleum ether = 1/4) as a yellow solid (41 mg) in 89% yield; Mp 169–171 °C;  $^1\text{H}$  NMR (400 MHz,  $\text{CDCl}_3$ ):  $\delta$  7.65 (d,  $J = 7.4$  Hz, 1H), 7.46 (d,  $J = 7.4$  Hz, 1H), 7.40 (td,  $J = 7.8, 0.9$  Hz, 1H), 7.25–7.20 (m, 2H), 7.18–7.13 (m, 2H), 6.99 (s, 1H), 6.73 (d,  $J = 7.8$  Hz, 1H), 6.61 (d,  $J = 10.2$  Hz, 1H), 6.18–6.13 (m, 1H), 5.86–5.80 (m, 1H), 5.27 (d,  $J = 6.1$  Hz, 1H), 5.03 (dd,  $J = 10.2, 1.3$  Hz, 1H), 3.63 (s, 3H), 2.91 (s, 3H). ppm;  $^{13}\text{C}$  NMR (100 MHz,  $\text{CDCl}_3$ ):  $\delta$  173.9, 166.2, 144.4, 139.3, 135.1, 131.5, 130.3, 130.0, 129.8, 129.7, 127.1, 126.7, 125.2, 123.9, 121.8, 109.0, 106.7, 100.4, 94.6, 74.8, 62.2, 51.4, 51.0, 25.9 ppm; ESI-HRMS: calcd. for  $\text{C}_{24}\text{H}_{20}\text{ClN}_3\text{O}_5 + \text{H}^+$  466.1164, found 466.1160.

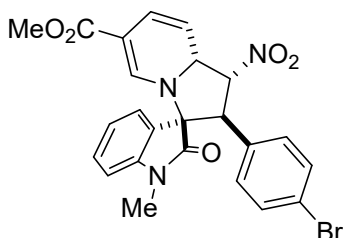

**Synthesis of 3af** pyridinium salt **1a** (36.2 mg, 0.10 mmol) and nitroolefin **2f** (27.2 mg, 0.12 mmol) were dissolved in DCM (2.0 mL),  $\text{Et}_3\text{N}$  was added and stirred at room temperature for 5 minutes. Upon

workup, product **3af** was obtained by flash chromatography (EtOAc/petroleum ether = 1/4) as a yellow solid (46 mg) in 90% yield; Mp 184–186 °C; <sup>1</sup>H NMR (400 MHz, CDCl<sub>3</sub>): δ 7.50 (d, *J* = 7.4 Hz, 1H), 7.43–7.37 (m, 1H), 7.28 (brs, 1H), 7.25–7.22 (m, 2H), 6.95 (s, 1H), 6.83 (d, *J* = 8.3 Hz, 2H), 6.73 (d, *J* = 7.8 Hz, 1H), 6.58 (d, *J* = 10.1 Hz, 1H), 6.09–5.95 (m, 2H), 4.95 (d, *J* = 10.1 Hz, 1H), 4.31 (t, *J* = 9.5 Hz, 1H), 3.61 (s, 3H), 2.86 (s, 3H) ppm; <sup>13</sup>C NMR (100 MHz, CDCl<sub>3</sub>): δ 173.5, 166.2, 144.6, 139.1, 131.8, 131.7, 130.3, 130.1, 125.1, 125.0, 124.2, 123.0, 121.9, 109.4, 106.6, 100.9, 92.7, 74.8, 61.1, 56.7, 51.0, 25.9 ppm; ESI-HRMS: calcd. for C<sub>24</sub>H<sub>20</sub>BrN<sub>3</sub>O<sub>5</sub> + H<sup>+</sup> 510.0659, found 510.0647.

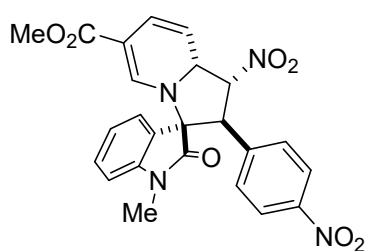

**Synthesis of 3ag:** pyridinium salt **1a** (36.2 mg, 0.10 mmol) and nitroolefin **2g** (23.3 mg, 0.12 mmol) were dissolved in DCM (2.0 mL), Et<sub>3</sub>N was added and stirred at room temperature for 5 minutes. Upon workup, product **3ag** was obtained by flash chromatography (EtOAc/petroleum ether = 1/4) as a yellow solid (38 mg) in 80%

yield; Mp 121–122 °C; <sup>1</sup>H NMR (400 MHz, CDCl<sub>3</sub>): δ 8.05 (d, *J* = 8.7 Hz, 2H), 7.60 (d, *J* = 7.3 Hz, 1H), 7.48 (td, *J* = 7.8, 0.9 Hz, 1H), 7.32 (t, *J* = 7.4 Hz, 1H), 7.20 (d, *J* = 8.7 Hz, 2H), 7.00 (s, 1H), 6.79 (d, *J* = 7.9 Hz, 1H), 6.64 (d, *J* = 10.1 Hz, 1H), 6.16–6.08 (m, 2H), 5.03 (dd, *J* = 10.2, 1.1 Hz, 1H), 4.53 (d, *J* = 6.8 Hz, 1H), 3.66 (s, 3H), 2.90 (s, 3H) ppm; <sup>13</sup>C NMR (100 MHz, CDCl<sub>3</sub>): δ 173.1, 166.1, 148.0, 144.5, 138.8, 138.8, 132.0, 129.6, 125.2, 125.1, 124.4, 123.7, 121.4, 109.6, 106.7, 101.2, 92.4, 74.9, 61.3, 56.6, 51.1, 25.9 ppm; ESI-HRMS: calcd. for C<sub>24</sub>H<sub>20</sub>N<sub>4</sub>O<sub>7</sub> + H<sup>+</sup> 477.1405, found 477.1412.

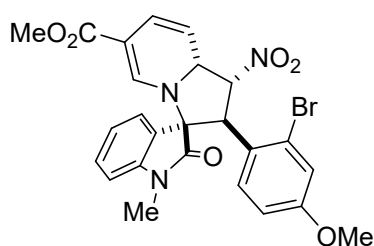

**Synthesis of 3ah:** pyridinium salt **1a** (36.2 mg, 0.10 mmol) and nitroolefin **2h** (30.8 mg, 0.12 mmol) were dissolved in DCM (2.0 mL), Et<sub>3</sub>N was added and stirred at room temperature for 5 minutes. Upon workup, product **3ah** was obtained by flash chromatography (EtOAc/petroleum ether = 1/4) as a yellow solid (43 mg) in 80%

yield; Mp 194–196 °C; <sup>1</sup>H NMR (400 MHz, CDCl<sub>3</sub>): δ 7.66 (d, *J* = 7.4 Hz, 1H), 7.42–7.35 (m, 2H), 7.21 (t, *J* = 7.4 Hz, 1H), 6.98 (s, 1H), 6.89 (d, *J* = 2.6 Hz, 1H), 6.80 (dd, *J* = 8.8, 2.6 Hz, 1H), 6.74 (d, *J* = 7.8 Hz, 1H), 6.60 (d, *J* = 10.2 Hz, 1H), 6.13 (dt, *J* = 7.5, 1.9 Hz, 1H), 5.76–5.73 (m, 1H), 5.20 (d, *J* = 6.1 Hz, 1H), 5.00 (dd, *J* = 10.2, 1.3 Hz, 1H), 3.72 (s, 3H), 3.62 (s, 3H), 2.94 (s, 3H) ppm; <sup>13</sup>C NMR (100 MHz, CDCl<sub>3</sub>): δ 174.1, 166.2, 159.8, 144.5, 139.3, 131.4, 130.5, 127.0, 126.2,

125.1, 123.8, 123.8, 121.8, 118.2, 114.0, 109.0, 106.7, 100.3, 95.1, 74.8, 62.0, 55.4, 53.4, 51.0, 26.0 ppm; ESI-HRMS: calcd. for  $C_{25}H_{22}BrN_3O_6 + H^+$  540.0765, found 540.0761.

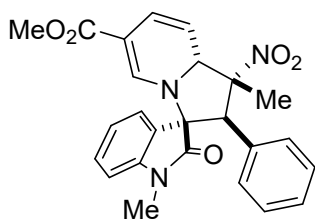

**Synthesis of 3ai:** pyridinium salt **1a** (36.2 mg, 0.10 mmol) and nitroolefin **2i** (19.6 mg, 0.12 mmol) were dissolved in DCM (2.0 mL),  $Et_3N$  was added and stirred at room temperature for 5 minutes. Upon workup, product **3ai** was obtained by flash chromatography (EtOAc/petroleum ether = 1/4) as a yellow solid (40 mg, 90% yield), d.r.

= 1.8:1; Mp 119–122 °C;  $^1H$  NMR<sub>major</sub> (400 MHz,  $CDCl_3$ ):  $\delta$  7.52 (d,  $J$  = 7.3 Hz, 1H), 7.33 (dd,  $J$  = 7.8, 1.0 Hz, 1H), 7.19–7.15 (m, 6H), 6.99 (s, 1H), 6.74 (d,  $J$  = 5.9 Hz, 1H), 6.58–6.54 (m, 1H), 5.85 (t,  $J$  = 2.1 Hz, 1H), 5.01 (dd,  $J$  = 10.3, 1.6 Hz, 1H), 4.90 (s, 1H), 3.61 (s, 3H), 3.07 (s, 3H), 1.73 (s, 3H) ppm;  $^{13}C$  NMR (100 MHz,  $CDCl_3$ ):  $\delta$  174.9, 173.3, 166.3, 166.0, 144.3, 143.1, 141.0, 139.3, 131.3, 131.1, 130.7, 130.6, 129.5, 129.3, 128.9, 128.6, 128.4, 125.1, 124.9, 124.6, 124.1, 124.0, 123.4, 122.9, 109.2, 108.7, 108.0, 107.6, 101.9, 100.6, 99.3, 94.3, 74.4, 73.7, 69.3, 67.7, 62.9, 61.5, 50.9, 50.9, 26.5, 26.1, 21.3, 16.7 ppm; ESI-HRMS: calcd. for  $C_{25}H_{23}N_3O_5 + H^+$  446.1710, found 446.1709.

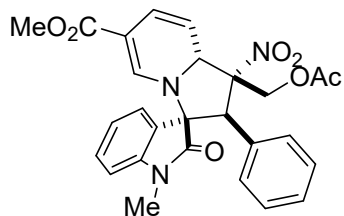

**Synthesis of 3aj:** pyridinium salt **1a** (36.2 mg, 0.10 mmol) and nitroolefin **2j** (26.5 mg, 0.12 mmol) were dissolved in DCM (2.0 mL),  $Et_3N$  was added and stirred at room temperature for 5 minutes. Upon workup, product **3aj** was obtained by flash chromatography

(EtOAc/petroleum ether = 1/4) as a yellow solid (30 mg) in 59% yield; Mp 132–135 °C;  $^1H$  NMR (400 MHz,  $CDCl_3$ ):  $\delta$  7.51–7.49 (m, 1H), 7.36 (td,  $J$  = 7.8, 1.1 Hz, 1H), 7.21–7.15 (m, 4H), 7.11–7.08 (m, 2H), 6.98 (s, 1H), 6.75 (d,  $J$  = 7.8 Hz, 1H), 6.57–6.54 (m, 1H), 6.05 (t,  $J$  = 2.1 Hz, 1H), 5.05 (dd,  $J$  = 10.3, 1.5 Hz, 1H), 4.82 (s, 1H), 4.75 (t,  $J$  = 13.2 Hz, 2H), 3.62 (s, 3H), 3.10 (s, 3H), 1.69 (s, 3H) ppm;  $^{13}C$  NMR (100 MHz,  $CDCl_3$ ):  $\delta$  174.7, 169.5, 166.2, 144.5, 138.9, 131.6, 130.3, 129.8, 128.9, 128.8, 125.0, 124.6, 124.2, 122.2, 109.4, 108.7, 100.6, 99.5, 74.0, 65.8, 64.0, 60.3, 50.9, 26.2, 20.0 ppm; ESI-HRMS: calcd. for  $C_{27}H_{25}N_3O_7 + H^+$  504.1765, found 504.1758.

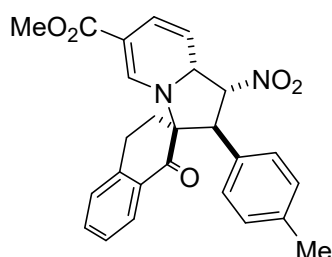

**Synthesis of 5aa:** pyridinium salt **4a** (36.1 mg, 0.10 mmol) and nitroolefin **2a** (19.6 mg, 0.12 mmol) were dissolved in DCM (2.0 mL),  $Et_3N$  was added and stirred at room temperature for 5 minutes. Upon workup, product **5aa** was obtained by flash chromatography

(EtOAc/petroleum ether = 1/4) as a yellow solid (37 mg) in 83% yield; Mp 102–103 °C; <sup>1</sup>H NMR (400 MHz, CDCl<sub>3</sub>): δ 7.43–7.41 (m, 2H), 7.33–7.29 (m, 1H), 7.08–7.02 (m, 2H), 6.77 (brs, 4H), 6.60 (d, *J* = 10.1 Hz, 1H), 5.76 (d, *J* = 5.8 Hz, 1H), 5.31–5.30 (m, 1H), 5.06 (d, *J* = 10.2 Hz, 1H), 4.25 (d, *J* = 1.8 Hz, 1H), 3.67 (s, 3H), 3.49–3.40 (m, 1H), 3.22 (d, *J* = 17.3 Hz, 1H), 2.76–2.68 (m, 2H), 2.11 (s, 3H) ppm; <sup>13</sup>C NMR (100 MHz, CDCl<sub>3</sub>): δ 195.7, 166.3, 144.1, 141.4, 140.7, 138.2, 133.6, 132.1, 129.2, 128.5, 127.9, 127.6, 126.6, 125.6, 106.3, 100.3, 95.6, 74.9, 65.3, 54.4, 50.9, 33.6, 26.6, 20.7 ppm; ESI-HRMS: calcd. for C<sub>26</sub>H<sub>24</sub>N<sub>2</sub>O<sub>5</sub> + H<sup>+</sup> 445.1758, found 445.1754.

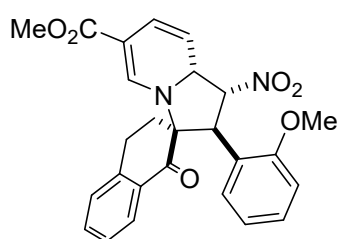

**Synthesis of 5ab:** pyridinium salt **4a** (36.1 mg, 0.10 mmol) and nitroolefin **2b** (21.5 mg, 0.12 mmol) were dissolved in DCM (2.0 mL), Et<sub>3</sub>N was added and stirred at room temperature for 5 minutes. Upon workup, product **5ab** was obtained by flash chromatography (EtOAc/petroleum ether = 1/4) as a yellow solid (43 mg) in 94% yield;

Mp 108–109 °C; <sup>1</sup>H NMR (400 MHz, CDCl<sub>3</sub>): δ 7.42 (s, 1H), 7.39 (dd, *J* = 8.1, 1.3 Hz, 1H), 7.28–7.23 (m, 1H), 7.02–6.94 (m, 3H), 6.88 (dd, *J* = 7.7, 1.5 Hz, 1H), 6.66 (td, *J* = 7.6, 1.0 Hz, 1H), 6.60 (ddd, *J* = 10.2, 2.0, 1.3 Hz, 1H), 6.40 (d, *J* = 8.3 Hz, 1H), 5.74 (dt, *J* = 6.1, 1.9 Hz, 1H), 5.28 (dd, *J* = 6.1, 2.4 Hz, 1H), 5.04 (dd, *J* = 10.2, 1.2 Hz, 1H), 4.73 (d, *J* = 2.3 Hz, 1H), 3.68 (s, 3H), 3.64–3.61 (m, 1H), 3.60 (s, 3H), 3.11 (ddd, *J* = 17.9, 5.3, 2.0 Hz, 1H), 2.75–2.60 (m, 2H) ppm; <sup>13</sup>C NMR (100 MHz, CDCl<sub>3</sub>): δ 195.6, 166.4, 156.2, 141.7, 141.0, 133.1, 132.5, 130.1, 129.7, 127.7, 127.1, 126.4, 125.6, 123.7, 120.8, 110.1, 106.4, 100.0, 95.2, 75.1, 64.9, 54.8, 50.8, 48.9, 34.1, 26.3 ppm; ESI-HRMS: calcd. for C<sub>26</sub>H<sub>24</sub>N<sub>2</sub>O<sub>6</sub> + H<sup>+</sup> 461.1707, found 461.1704.

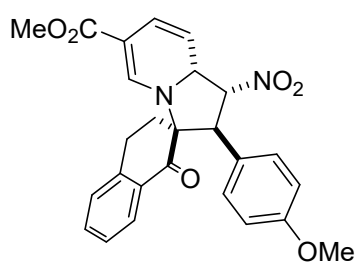

**Synthesis of 5ac:** pyridinium salt **4a** (36.1 mg, 0.10 mmol) and nitroolefin **2c** (21.5 mg, 0.12 mmol) were dissolved in DCM (2.0 mL), Et<sub>3</sub>N was added and stirred at room temperature for 5 minutes. Upon workup, product **5ac** was obtained by flash chromatography (EtOAc/petroleum ether = 1/4) as a yellow solid (44 mg) in 96% yield;

Mp 104–105 °C; <sup>1</sup>H NMR (400 MHz, CDCl<sub>3</sub>): δ 7.47–7.46 (m, 1H), 7.41 (s, 1H), 7.32 (td, *J* = 7.6, 1.4 Hz, 1H), 7.08 (d, *J* = 9.2 Hz, 2H), 6.81 (d, *J* = 8.8 Hz, 2H), 6.60 (ddd, *J* = 10.2, 2.0, 1.3 Hz, 1H), 6.51 (d, *J* = 8.8 Hz, 2H), 5.75 (dt, *J* = 6.1, 2.0 Hz, 1H), 5.30 (dd, *J* = 6.1, 2.5 Hz, 1H), 5.05 (dd, *J* = 10.2, 1.2 Hz, 1H), 4.25 (d, *J* = 2.6 Hz, 1H), 3.67 (s, 3H), 3.62 (s, 3H), 3.47–3.38 (m, 1H), 3.26–3.19 (m, 1H), 2.73–2.68 (m, 2H) ppm; <sup>13</sup>C NMR (100 MHz, CDCl<sub>3</sub>): δ 195.8, 166.3, 159.3, 141.4, 140.6,

133.7, 132.1, 129.9, 128.0, 127.5, 127.0, 126.8, 125.6, 114.0, 106.3, 100.4, 95.6, 74.7, 65.1, 55.2, 54.1, 50.8, 33.6, 26.6 ppm; ESI-HRMS: calcd. for  $C_{26}H_{24}N_2O_6 + H^+$  461.1707, found 461.1701.

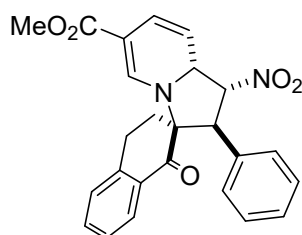

**Synthesis of 5ad:** pyridinium salt **4a** (36.1 mg, 0.10 mmol) and nitroolefin **2d** (17.9 mg, 0.12 mmol) were dissolved in DCM (2.0 mL),  $Et_3N$  was added and stirred at room temperature for 5 minutes. Upon workup, product **5ad** was obtained by flash chromatography (EtOAc/petroleum ether = 1/4) as a yellow solid (41 mg) in 95% yield; Mp 88–90 °C;  $^1H$

NMR (400 MHz,  $CDCl_3$ ):  $\delta$  7.43–7.42 (m, 2H), 7.30 (td,  $J = 7.6, 1.3$  Hz, 1H), 7.07–7.02 (m, 2H), 7.00–6.98 (m, 3H), 6.91–6.89 (m, 2H), 6.60 (ddd,  $J = 10.2, 2.0, 1.3$  Hz, 1H), 5.78 (dt,  $J = 6.0, 1.9$  Hz, 1H), 5.32 (dd,  $J = 6.0, 2.3$  Hz, 1H), 5.06 (dd,  $J = 10.2, 1.1$  Hz, 1H), 4.30 (d,  $J = 2.3$  Hz, 1H), 3.67 (s, 3H), 3.50–3.41 (m, 1H), 3.26–3.20 (m, 1H), 2.79–2.66 (m, 2H) ppm;  $^{13}C$  NMR (100 MHz,  $CDCl_3$ ):  $\delta$  195.6, 166.3, 141.3, 140.6, 135.3, 133.7, 132.1, 128.7, 128.6, 128.3, 127.9, 127.6, 126.7, 125.7, 106.4, 100.4, 95.5, 74.9, 65.4, 54.7, 50.8, 33.7, 26.6 ppm; ESI-HRMS: calcd. for  $C_{25}H_{22}N_2O_5 + H^+$  431.1601, found 431.1597.

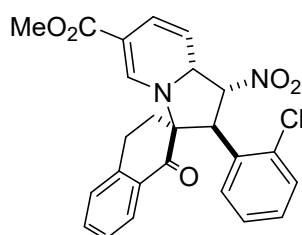

**Synthesis of 5ae:** pyridinium salt **4a** (36.1 mg, 0.10 mmol) and nitroolefin **2e** (22.0 mg, 0.12 mmol) were dissolved in DCM (2.0 mL),  $Et_3N$  was added and stirred at room temperature for 5 minutes. Upon workup, product **5ae** was obtained by flash chromatography (EtOAc/petroleum ether = 1/4) as a yellow solid (36 mg) in 78% yield; 7.1:1 d.r.; Mp 144–

147 °C;  $^1H$  NMR (400 MHz,  $CDCl_3$ ):  $\delta$  7.52 (dd,  $J = 7.9, 1.0$  Hz, 1H), 7.45 (s, 1H), 7.32 (td,  $J = 7.6, 1.4$  Hz, 1H), 7.10–7.04 (m, 3H), 7.00–6.91 (m, 3H), 6.61 (ddd,  $J = 10.1, 2.1, 1.2$  Hz, 1H), 5.76 (dt,  $J = 6.5, 2.0$  Hz, 1H), 5.23 (dd,  $J = 6.5, 3.4$  Hz, 1H), 5.04 (d,  $J = 3.4$  Hz, 1H), 5.01 (dd,  $J = 10.1, 1.3$  Hz, 1H), 3.68 (s, 3H), 3.65–3.56 (m, 1H), 3.16 (ddd,  $J = 18.1, 5.1, 3.1$  Hz, 1H), 2.80–2.66 (m, 2H) ppm;  $^{13}C$  NMR (100 MHz,  $CDCl_3$ ):  $\delta$  196.1, 166.3, 141.9, 140.4, 134.2, 133.9, 133.2, 132.1, 129.9, 129.8, 129.3, 128.3, 127.5, 127.3, 126.7, 125.7, 106.2, 101.0, 95.4, 75.5, 64.4, 50.9, 50.0, 33.6, 26.3 ppm; ESI-HRMS: calcd. for  $C_{25}H_{21}ClN_2O_5 + H^+$  465.1212, found 465.1205.

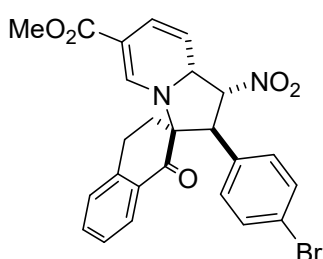

**Synthesis of 5af:** pyridinium salt **4a** (36.1 mg, 0.10 mmol) and nitroolefin **2f** (27.2 mg, 0.12 mmol) were dissolved in DCM (2.0 mL),  $Et_3N$  was added and stirred at room temperature for 5 minutes. Upon workup, product **5af** was obtained by flash chromatography



(EtOAc/petroleum ether = 1/4) as a yellow solid (47 mg) in 93% yield; Mp 156–159 °C; <sup>1</sup>H NMR (400 MHz, CDCl<sub>3</sub>): δ 7.47 (d, *J* = 7.9 Hz, 1H), 7.41 (s, 1H), 7.37 (td, *J* = 7.5, 1.3 Hz, 1H), 7.14–7.08 (m, 4H), 6.79 (d, *J* = 8.5 Hz, 2H), 6.60 (ddd, *J* = 10.2, 1.9, 1.3 Hz, 1H), 5.73 (dt, *J* = 6.1, 1.9 Hz, 1H), 5.29 (dd, *J* = 6.1, 2.6 Hz, 1H), 5.06 (dd, *J* = 10.2, 1.3 Hz, 1H), 4.24 (d, *J* = 2.6 Hz, 1H), 3.67 (s, 3H), 3.42–3.34 (m, 1H), 3.25 (dt, *J* = 17.9, 4.4 Hz, 1H), 2.74–2.69 (m, 2H) ppm; <sup>13</sup>C NMR (100 MHz, CDCl<sub>3</sub>): δ 195.3, 166.2, 141.2, 140.3, 134.2, 134.1, 131.92, 131.7, 130.4, 128.1, 127.7, 127.0, 125.7, 122.5, 106.4, 100.7, 95.2, 74.8, 65.2, 54.2, 50.9, 33.4, 26.5 ppm; ESI-HRMS: calcd. for C<sub>25</sub>H<sub>21</sub>BrN<sub>2</sub>O<sub>5</sub> + H<sup>+</sup> 509.0707 found 509.0705.

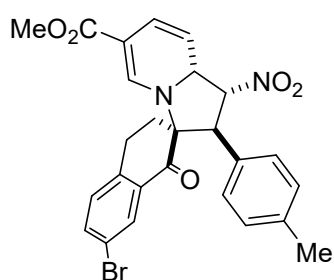

**Synthesis of 5ba:** pyridinium salt **4b** (43.9 mg, 0.10 mmol) and nitroolefin **2a** (19.6 mg, 0.12 mmol) were dissolved in DCM (2.0 mL), Et<sub>3</sub>N was added and stirred at room temperature for 5 minutes. Upon workup, product **5ba** was obtained by flash chromatography (EtOAc/petroleum ether = 1/4) as a yellow solid (38 mg) in 73% yield;

Mp 163–164 °C; <sup>1</sup>H NMR (400 MHz, CDCl<sub>3</sub>): δ 7.41 (dd, *J* = 18.6, 10.4 Hz, 3H), 6.96 (d, *J* = 8.1 Hz, 1H), 6.81 (d, *J* = 7.8 Hz, 2H), 6.72 (d, *J* = 7.9 Hz, 2H), 6.60 (d, *J* = 10.1 Hz, 1H), 5.73 (d, *J* = 5.7 Hz, 1H), 5.29 (d, *J* = 4.5 Hz, 1H), 5.08 (d, *J* = 10.1 Hz, 1H), 4.24 (s, 1H), 3.67 (s, 3H), 3.42–3.34 (m, 1H), 3.20 (d, *J* = 16.0 Hz, 1H), 2.77–2.62 (m, 2H), 2.17 (s, 3H) ppm; <sup>13</sup>C NMR (100 MHz, CDCl<sub>3</sub>): δ 194.7, 166.2, 140.4, 139.9, 138.7, 136.2, 133.7, 131.9, 130.1, 129.6, 129.3, 128.5, 125.7, 120.7, 106.5, 100.6, 95.3, 74.8, 65.5, 54.1, 50.9, 33.2, 26.2, 20.8 ppm; ESI-HRMS: calcd. for C<sub>26</sub>H<sub>23</sub>BrN<sub>2</sub>O<sub>5</sub> + H<sup>+</sup> 523.0863, found 523.0854.

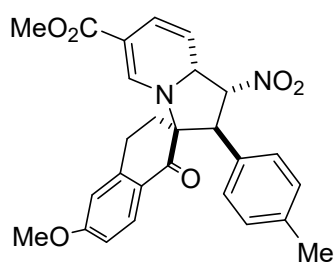

**Synthesis of 5ca:** pyridinium salt **4c** (39.1 mg, 0.10 mmol) and nitroolefin **2a** (19.6 mg, 0.12 mmol) were dissolved in DCM (2.0 mL), Et<sub>3</sub>N was added and stirred at room temperature for 5 minutes. Upon workup, product **5ca** was obtained by flash chromatography (EtOAc/petroleum ether = 1/4) as a yellow solid (44 mg) in 93% yield;

Mp 88–89 °C; <sup>1</sup>H NMR (400 MHz, CDCl<sub>3</sub>): δ 7.48 (d, *J* = 8.8 Hz, 1H), 7.42 (s, 1H), 6.83 (s, 4H), 6.59 (d, *J* = 9.3 Hz, 2H), 6.51 (s, 1H), 5.77 (d, *J* = 6.0 Hz, 1H), 5.34 (dd, *J* = 5.8, 2.5 Hz, 1H), 5.02 (d, *J* = 10.1 Hz, 1H), 4.20 (d, *J* = 2.4 Hz, 1H), 3.79 (s, 3H), 3.67 (s, 3H), 3.39–3.31 (m, 1H), 3.16–3.12 (m, 1H), 2.69–2.66 (m, 2H), 2.14 (s, 3H) ppm; <sup>13</sup>C NMR (100 MHz, CDCl<sub>3</sub>): δ 194.1, 166.4, 163.9, 144.1, 140.6, 138.1, 132.2, 130.2, 129.2, 128.6, 125.7, 125.5, 113.6, 111.7, 106.4, 100.3,

95.7, 74.4, 65.0, 55.4, 55.1, 50.8, 33.8, 26.9, 20.8 ppm; ESI-HRMS: calcd. for  $C_{27}H_{26}N_2O_6 + H^+$  475,1864, found 475.1858.

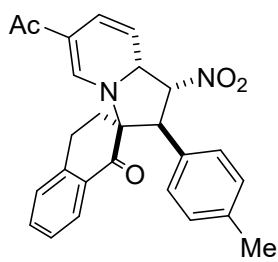

**Synthesis of 5da:** pyridinium salt **4d** (34.5 mg, 0.10 mmol) and nitroolefin **2a** (19.6 mg, 0.12 mmol) were dissolved in DCM (2.0 mL),  $Et_3N$  was added and stirred at room temperature for 5 minutes. Upon workup, product **5da** was obtained by flash chromatography (EtOAc/petroleum ether = 1/4) as a yellow solid (41 mg) in 96% yield; Mp 110–113 °C;  $^1H$  NMR (400 MHz,  $CDCl_3$ ):  $\delta$  7.41 (dd,  $J = 7.9, 0.9$  Hz, 1H), 7.36 (s, 1H), 7.32 (td,  $J = 7.6, 1.3$  Hz, 1H), 7.10–7.02 (m, 2H), 6.80–6.72 (m, 5H), 5.75 (dt,  $J = 5.9, 1.9$  Hz, 1H), 5.29 (dd,  $J = 6.0, 2.2$  Hz, 1H), 5.13 (dd,  $J = 10.2, 1.3$  Hz, 1H), 4.29 (d,  $J = 2.2$  Hz, 1H), 3.52–3.43 (m, 1H), 3.24 (ddd,  $J = 17.8, 5.0, 2.7$  Hz, 1H), 2.81–2.69 (m, 2H), 2.14 (s, 3H), 2.11 (s, 3H) ppm;  $^{13}C$  NMR (100 MHz,  $CDCl_3$ ):  $\delta$  195.7, 191.6, 141.3, 141.3, 138.3, 133.7, 132.1, 132.0, 129.2, 128.5, 127.9, 127.6, 126.7, 125.3, 111.3, 107.1, 95.3, 75.1, 65.4, 54.3, 33.8, 26.6, 24.5, 20.7 ppm; ESI-HRMS: calcd. for  $C_{26}H_{24}N_2O_4 + H^+$  429.1809, found 429.1808.

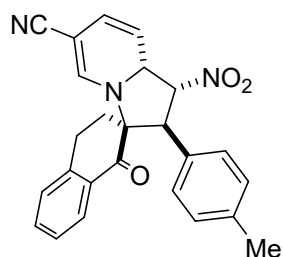

**Synthesis of 5ea:** pyridinium salt **4e** (32.8 mg, 0.10 mmol) and nitroolefin **2a** (19.6 mg, 0.12 mmol) were dissolved in DCM (2.0 mL),  $Et_3N$  was added and stirred at room temperature for 5 minutes. Upon workup, product **5ea** was obtained by flash chromatography (EtOAc/petroleum ether = 1/4) as a yellow solid (34 mg) in 83% yield; Mp 120–122 °C;  $^1H$  NMR (400 MHz,  $CDCl_3$ ):  $\delta$  7.39 (d,  $J = 7.8$  Hz, 1H), 7.34–7.30 (m, 1H), 7.08–7.01 (m, 2H), 6.91 (s, 1H), 6.78–6.72 (m, 4H), 6.07 (d,  $J = 10.0$  Hz, 1H), 5.72 (dd,  $J = 4.1, 1.9$  Hz, 1H), 5.29 (dd,  $J = 6.0, 2.2$  Hz, 1H), 5.09 (d,  $J = 10.1$  Hz, 1H), 4.25 (d,  $J = 2.2$  Hz, 1H), 3.48–3.40 (m, 1H), 3.25–3.18 (m, 1H), 2.76–2.70 (m, 1H), 2.55 (td,  $J = 12.5, 5.3$  Hz, 1H), 2.10 (s, 3H) ppm;  $^{13}C$  NMR (100 MHz,  $CDCl_3$ ):  $\delta$  195.4, 142.4, 141.2, 138.3, 133.8, 131.9, 131.7, 129.2, 128.4, 127.9, 127.5, 126.7, 124.7, 120.0, 108.2, 95.2, 80.7, 75.1, 64.4, 54.0, 33.6, 26.5, 20.7 ppm; ESI-HRMS: calcd. for  $C_{25}H_{21}N_3O_3 + H^+$  412.1656, found 412.1652.

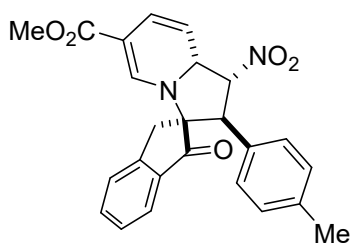

**Synthesis of 5fa:** pyridinium salt **4f** (34.7 mg, 0.10 mmol) and nitroolefin **2a** (19.6 mg, 0.12 mmol) were dissolved in DCM (2.0 mL),  $Et_3N$  was added and stirred at room temperature for 5 minutes. Upon workup, product **5fa** was obtained by flash chromatography

(EtOAc/petroleum ether = 1/4) as a yellow solid (28 mg) in 65% yield; Mp 91–94 °C; <sup>1</sup>H NMR (400 MHz, CDCl<sub>3</sub>): δ 7.54 (t, J = 7.5 Hz, 1H), 7.45 (d, J = 7.7 Hz, 1H), 7.38 (d, J = 7.7 Hz, 1H), 7.24 (t, J = 7.6 Hz, 1H), 7.06 (d, J = 8.0 Hz, 2H), 6.93 (d, J = 8.1 Hz, 3H), 6.56 (d, J = 9.8 Hz, 1H), 6.01 (dd, J = 11.4, 8.8 Hz, 1H), 5.28–5.20 (m, 2H), 4.25 (d, J = 11.4 Hz, 1H), 3.68 (s, 2H), 3.65 (s, 3H), 2.17 (s, 3H) ppm; <sup>13</sup>C NMR (100 MHz, CDCl<sub>3</sub>): δ 202.5, 166.2, 150.2, 139.3, 138.7, 136.2, 134.0, 129.5, 128.4, 128.3, 126.7, 125.8, 124.7, 124.0, 108.2, 103.8, 87.6, 75.8, 62.2, 56.6, 51.0, 38.5, 20.9 ppm. ESI-HRMS: calcd. for C<sub>25</sub>H<sub>22</sub>N<sub>2</sub>O<sub>5</sub> + Na<sup>+</sup> 453.1421, found 453.1449.

## 6. The procedure of three-component one-pot sequential reaction

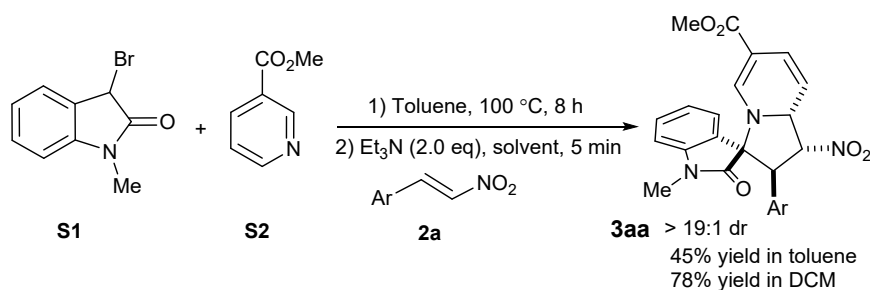

Procedure: A solution of **S1** (34 mg, 0.15 mmol) and **S2** (28 mg, 0.2 mmol) was stirred in anhydrous toluene (1.0 mL) at 100 °C for 8 h for the generation of pyridinium salt **1a**. After cooled down to room temperature, nitroolefin **2a** (16.3 mg, 0.1 mmol) and Et<sub>3</sub>N (20 mg, 0.2 mmol) were added in sequential. The reaction was stirred for further 5 min to reach the consumption. The solvent was evaporated in vacuo and product **3aa** was obtained by flash chromatography (EtOAc/petroleum ether = 1/4) as a yellow solid (18 mg, 40% yield, > 19:1 d.r.). Alternatively, after the generation of salt **1a**, toluene was evaporated in vacuo and DCM (1.0 mL) was added followed by the addition of nitroolefin **2a** (16.3 mg, 0.1 mmol) and Et<sub>3</sub>N (20 mg, 0.2 mmol) in sequential at room temperature for 5 min. The product **3aa** was obtained as a yellow solid in good yield by the above operation (32 mg, 72% yield, > 19:1 d.r.).

## 7. Synthetic transformations

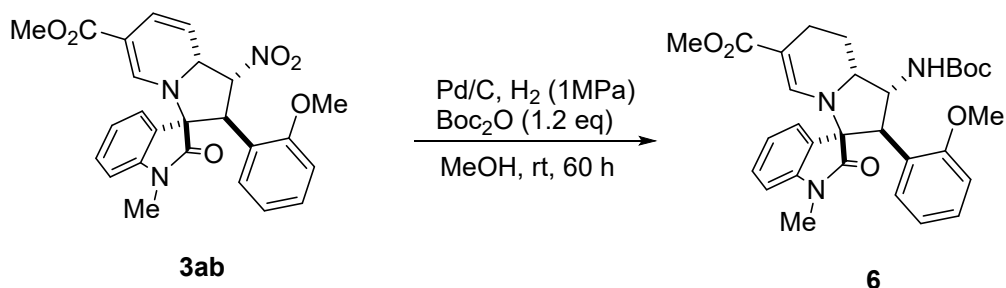

**Synthesis of 6:** In an autoclave, cycloadduct **3ab** (46.1 mg, 0.10 mmol) in MeOH (2.0 ml) was added Pd/C (5 mg) and Boc<sub>2</sub>O (26.2 mg, 0.12 mmol), and stirred for 60 h at room temperature under hydrogen atmosphere at 1.0 MPa. Upon workup, the mixture was filtered through celite and the filtrate was concentrated and purified by flash chromatography on silica gel (EtOAc/petroleum ether = 1/3) to give product **6** as a yellow solid (43 mg, 80% yield); Mp 132–134 °C; <sup>1</sup>H NMR (400 MHz, CDCl<sub>3</sub>): δ 7.50 (d, *J* = 7.0 Hz, 1H), 7.28–7.21 (m, 2H), 7.11–7.06 (m, 2H), 6.96 (s, 1H), 6.85 (t, *J* = 7.4 Hz, 1H), 6.57–6.53 (m, 2H), 5.41 (d, *J* = 9.1 Hz, 1H), 4.58–4.40 (m, 2H), 4.06 (d, *J* = 11.3 Hz, 1H), 3.56 (s, 3H), 3.26 (s, 3H), 2.81 (s, 3H), 2.61 (d, *J* = 16.5 Hz, 1H), 2.36–2.28 (m, 1H), 2.07 (d, *J* = 9.9 Hz, 1H), 1.53 (dd, *J* = 12.2, 5.0 Hz, 1H), 1.38 (s, 9H) ppm; <sup>13</sup>C NMR (100 MHz, CDCl<sub>3</sub>): δ 175.1, 168.7, 157.9, 155.6, 144.3, 140.1, 129.8, 128.8, 128.5, 125.2, 124.7, 122.4, 120.9, 120.6, 109.9, 108.1, 97.8, 79.7, 73.6, 58.2, 54.7, 53.1, 50.5, 50.3, 28.2, 25.6, 22.8, 21.2 ppm; ESI-HRMS: calcd. for C<sub>30</sub>H<sub>35</sub>N<sub>3</sub>O<sub>6</sub> + H<sup>+</sup> 534.2599, found 534.2587.

**Structure characterization of 6:** Based on the <sup>1</sup>H-NMR spectra of **3ab** and other prepared cycloadducts, the H-shift of H<sup>a</sup>, which is the only singlet at aromatic region in the spectra, is easily identified at about δ 7.0. After the hydrogenation under the catalysis of palladium, the <sup>1</sup>H-spectra of the observed product **6** still retained the singlet at δ 6.96, which implied the conjugated C=C bond remained rather than the other C=C bond on the pyridine moiety. Meanwhile, the other H-shifts and the C-shifts are reasonable in accordance with the structure **6**.

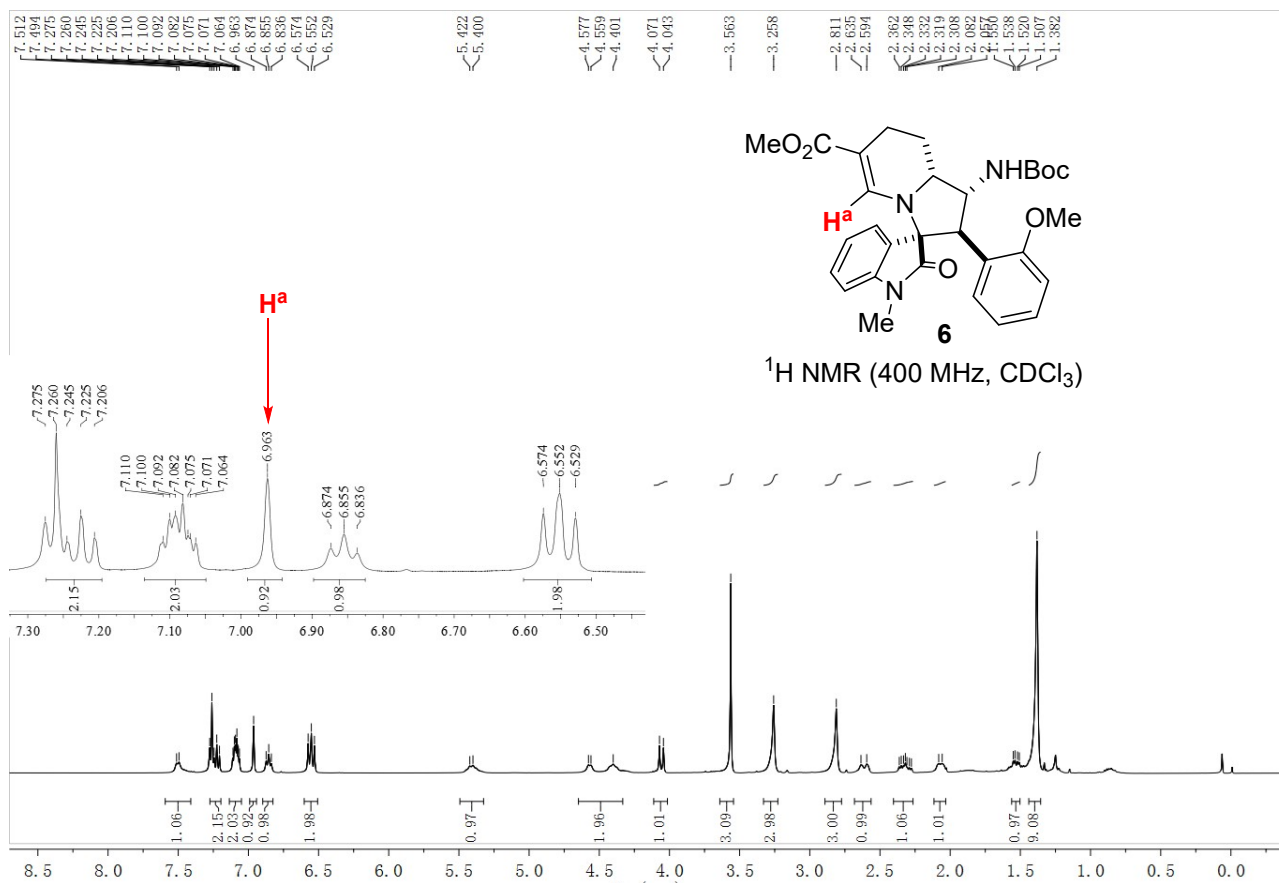

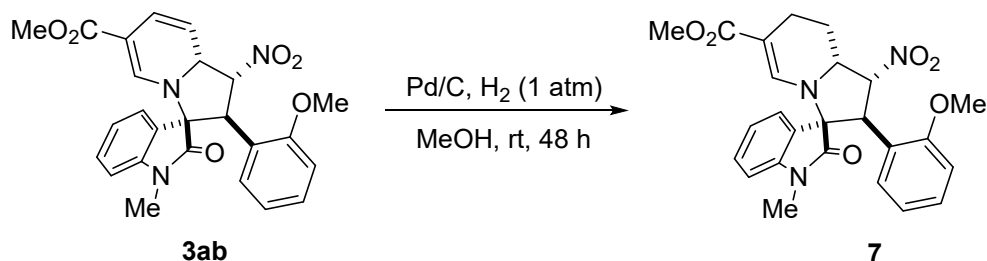

**Synthesis of 7:** In an autoclave, cycloadduct **3ab** (46.1 mg, 0.10 mmol) in MeOH (2.0 ml) was added Pd/C (5 mg) and stirred for 48 h at room temperature under hydrogen atmosphere at 1.0 atm. Upon workup, the mixture was filtered through celite and the filtrate was concentrated and purified by flash chromatography on silica gel (EtOAc/petroleum ether = 1/4) to give product **7** as a yellow solid (42.6 mg, 92% yield); Mp 145–146 °C;  $^1\text{H NMR}$  (400 MHz,  $\text{CDCl}_3$ ):  $\delta$  7.55 (d,  $J = 7.2$  Hz, 1H), 7.33–7.28 (m, 2H), 7.15 (ddd,  $J = 15.7, 11.8, 4.4$  Hz, 2H), 6.91 (s, 1H), 6.84 (t,  $J = 7.4$  Hz, 1H), 6.65–6.59 (m, 2H), 6.07 (t,  $J = 8.8$  Hz, 1H), 5.24 (d,  $J = 8.7$  Hz, 1H), 4.84–4.78 (m, 1H), 3.58 (s, 3H), 3.35 (s, 3H), 2.84 (s, 3H), 2.61 (dd,  $J = 17.1, 4.4$  Hz, 1H), 2.43–2.34 (m, 1H), 2.13–2.09 (m, 1H), 1.62 (dd,  $J = 12.1, 5.4$  Hz, 1H) ppm;  $^{13}\text{C NMR}$  (100 MHz,  $\text{CDCl}_3$ ):  $\delta$  175.0, 168.2, 157.7, 144.5, 138.4, 130.5, 129.5, 128.3, 125.8, 123.7, 123.1, 120.5, 120.2, 110.6, 108.4, 99.7, 89.6, 74.2, 57.5, 55.0, 50.8, 49.0, 25.7, 22.7, 20.7 ppm; ESI-HRMS: calcd. for  $\text{C}_{25}\text{H}_{25}\text{N}_3\text{O}_6^+ \text{H}^+$  464.1816, found 464.1813.

**Structure characterization of 7:** As above discussion, the  $\text{H}^a$  of structure **7** was observed as an obvious singlet at  $\delta$  6.908, which implied the structure **7** was reasonable. Additionally, the other H-shifts and the C-shifts are reasonable in accordance with the structure **7**.

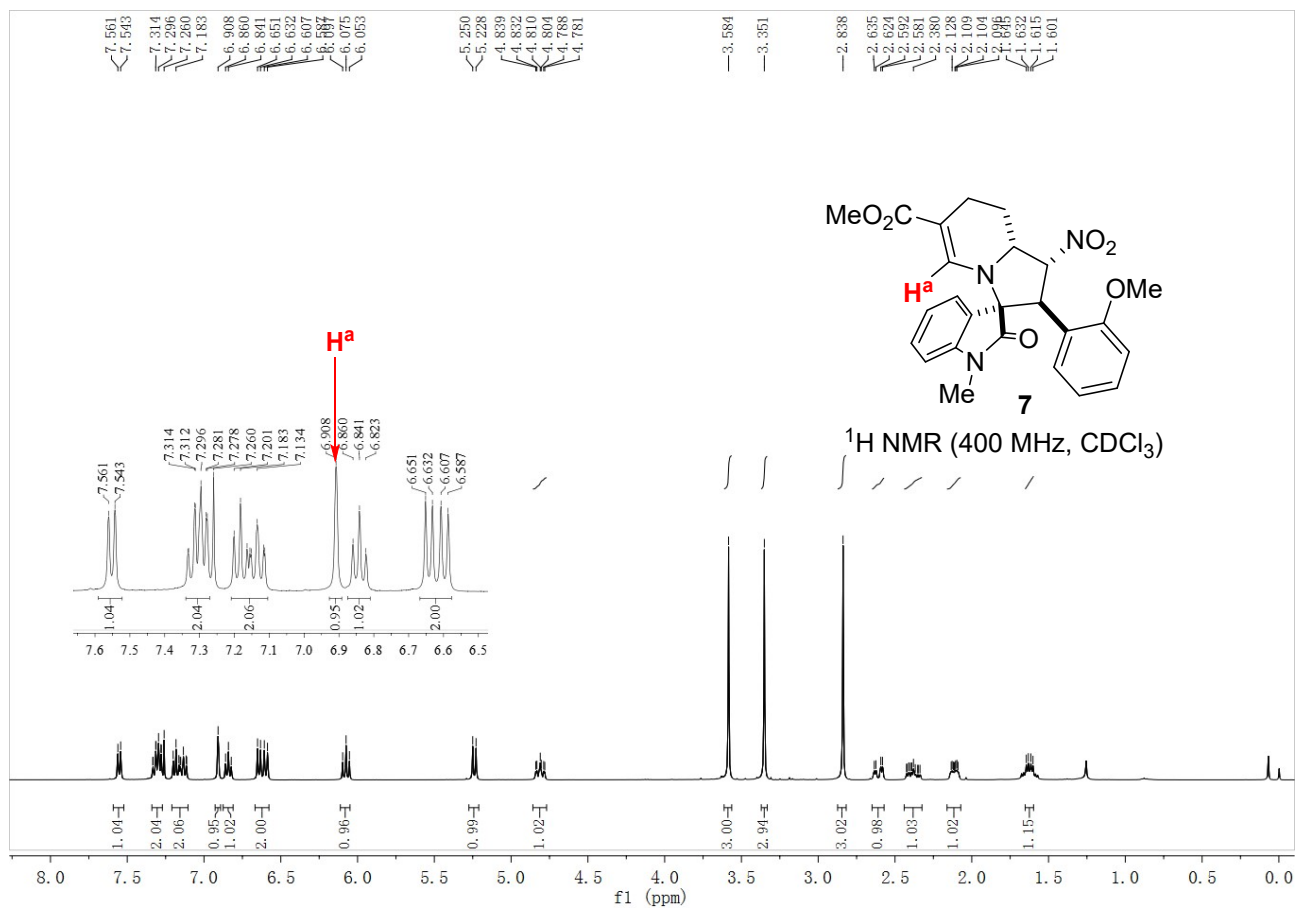

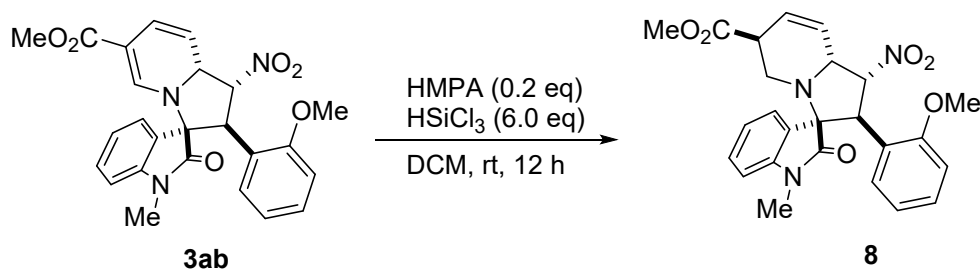

**Synthesis of 8:** Cycloadduct **3ab** (46.1 mg, 0.1 mmol) in DCM (2.0 ml) was added HMPA (3.6 mg, 0.02mmol) and HSiCl<sub>3</sub> (81.3 mg, 0.6 mmol), then stirred at room temperature for 12 h. Upon workup, the mixture was cooled to 0 °C and saturated NaHCO<sub>3</sub> was slowly added until pH = 7, then extracted with DCM. The combined organic layers were dried over anhydrous Na<sub>2</sub>SO<sub>4</sub>, filtered and concentrated in vacuum, then purified by flash chromatography on silica gel (EtOAc/petroleum ether = 1/6) to give product **8** as a yellow solid (27.8 mg, 60% yield); Mp 139–141 °C; <sup>1</sup>H NMR (400 MHz, CDCl<sub>3</sub>): δ 7.70 (d, *J* = 6.8 Hz, 1H), 7.31–7.27 (m, 1H), 7.19–7.11 (m, 3H), 6.84 (dd, *J* = 7.5, 6.9 Hz, 1H), 6.66–6.61(m, 2H), 6.02 (d, *J* = 10.3 Hz, 1H), 5.94 (ddd, *J* = 10.4, 2.6, 1.5 Hz, 1H), 5.65 (dd, *J* = 7.2, 4.3 Hz, 1H), 5.24–5.20 (m, 2H), 3.62 (s, 3H), 3.43–3.36 (m, 1H), 3.30 (s, 3H), 2.87–2.84 (m, 1H), 2.82 (s, 3H), 2.74 (t, *J* = 10.6 Hz, 1H) ppm; <sup>13</sup>C NMR (100 MHz, CDCl<sub>3</sub>): δ 175.0, 171.9, 157.4, 144.3, 129.4, 129.3, 128.9, 127.5, 126.8, 125.0, 124.9, 123.0, 122.8, 120.4, 110.3, 107.5, 91.5, 74.8, 60.6, 54.9, 51.9, 50.8, 44.4, 42.4, 25.4 ppm; ESI-HRMS: calcd. for C<sub>25</sub>H<sub>25</sub>N<sub>3</sub>O<sub>6</sub>+ H<sup>+</sup> 464.1816, found 464.1803.

**Structure characterization of 8:** As above discussion, there is no singlet at aromatic region in the <sup>1</sup>H-spectra of the obtained product **8**, and the appearance of a couple of olefin hydrogen H<sup>3</sup> and H<sup>4</sup> at δ 6.00 and 5.93 implied the conjugated C=C bond was reduced. Meanwhile, the rest H shift and C shift were reasonable in accordance with the structure **8**. Additionally, the relative configuration of the resulting generated ester group was determined via the NOE of **8**.



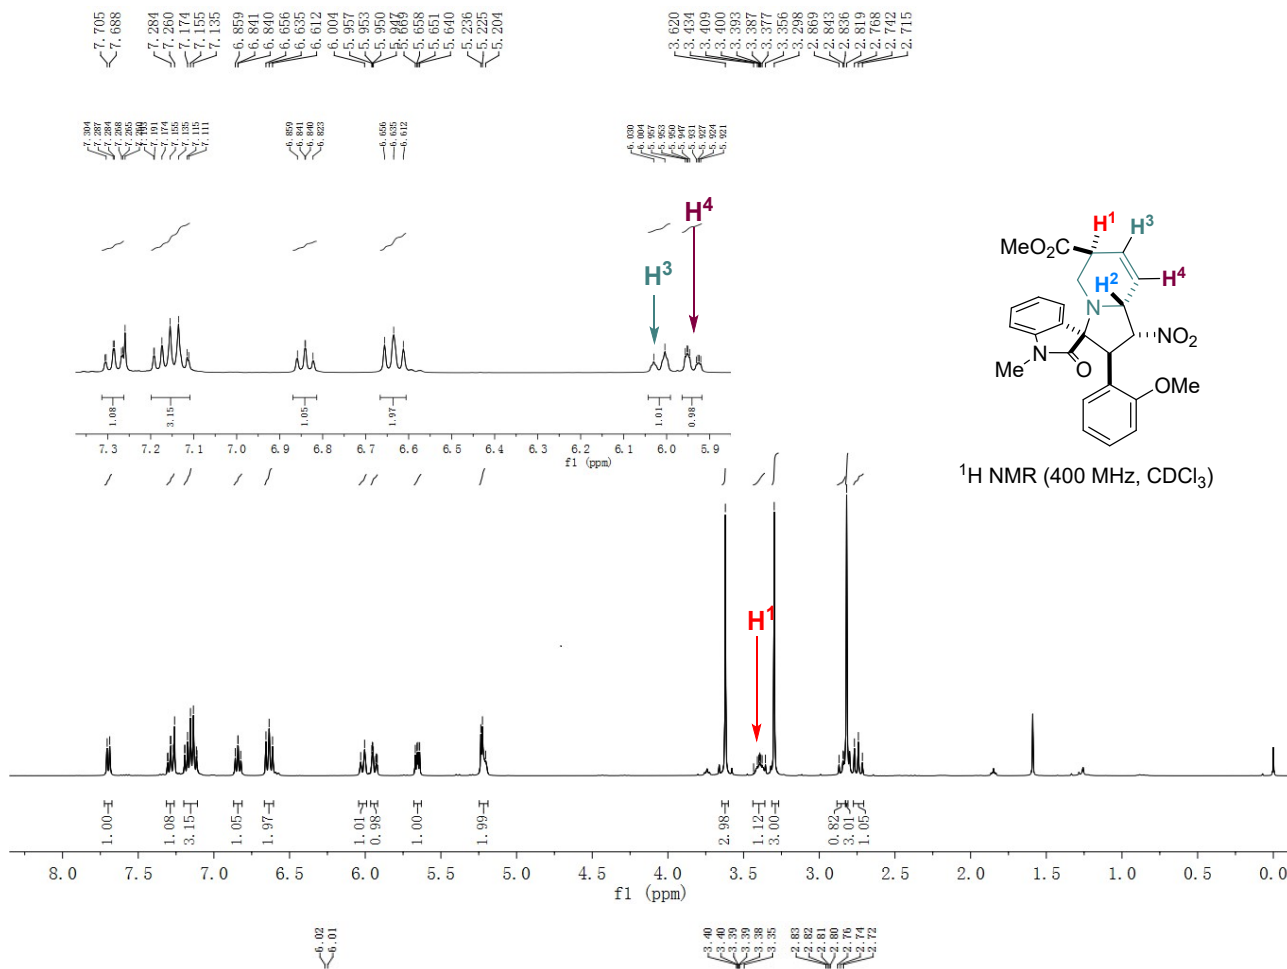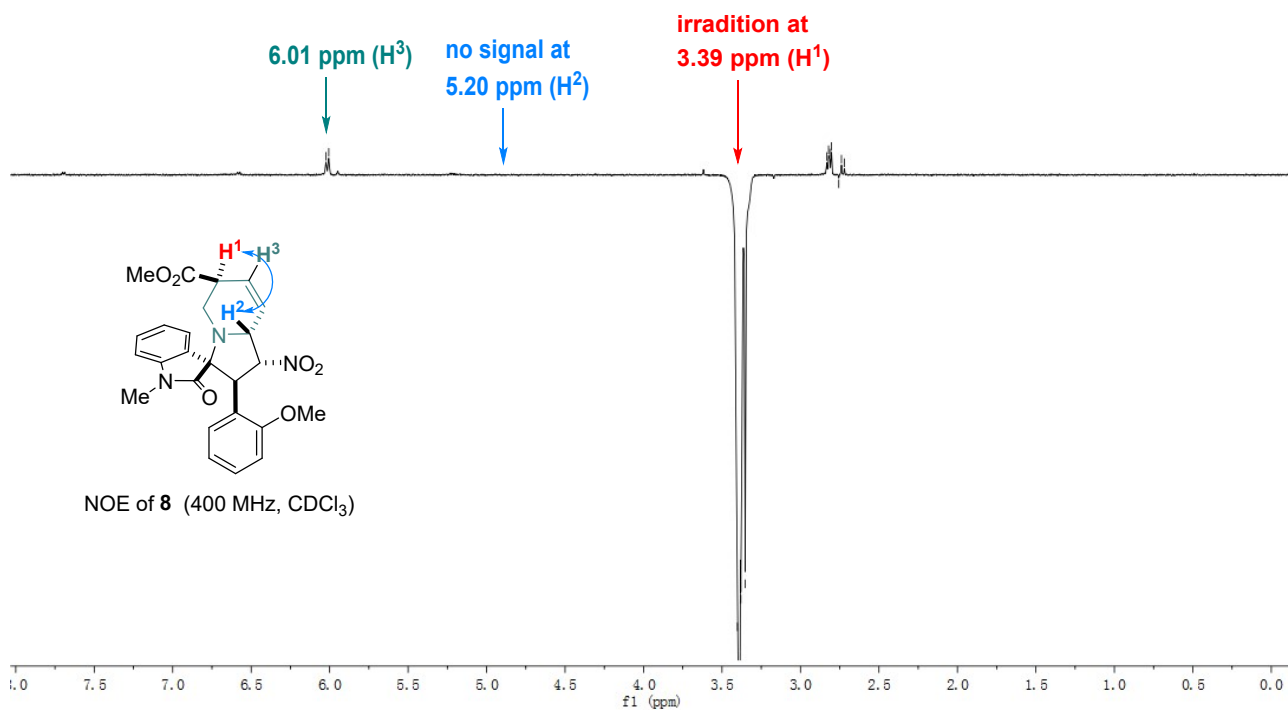

**8. Attempts for the hydrogenation of the both C=C bond on the pyridine moiety with product 3ab.**

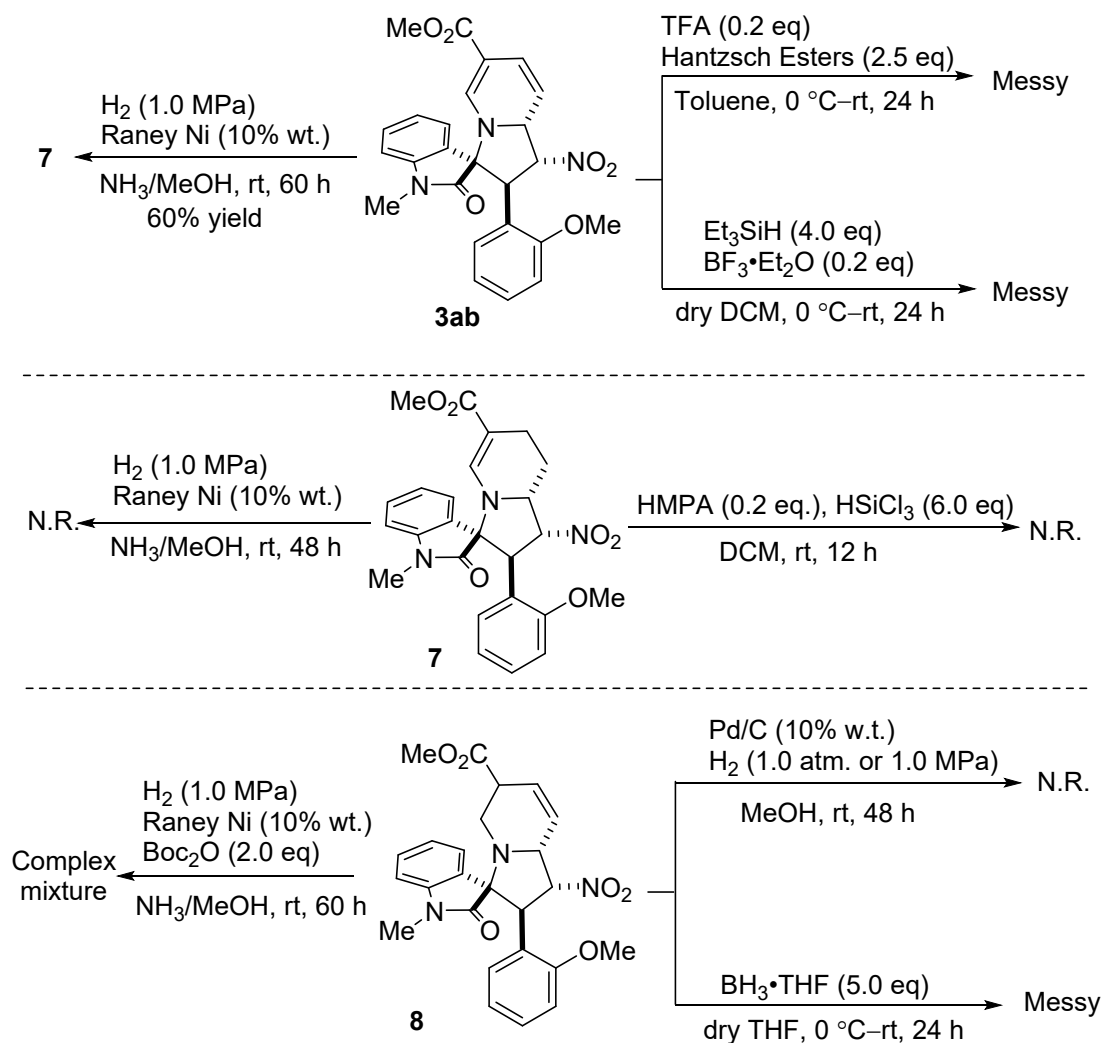

## 9. Crystal data and structure refinement for **3ab** and **5ba**

**Crystallization of 3ab:** The pure product **3ab** (40 mg) was dissolved in the mixture solvent of CHCl<sub>3</sub> and *iso*-propanol (3 mL, 1:2, v/v) in a 10 mL vial. Then, the solution was allowed for slow evaporation to afford the crystal of **3ab** in a good quality for the crystallography analysis.

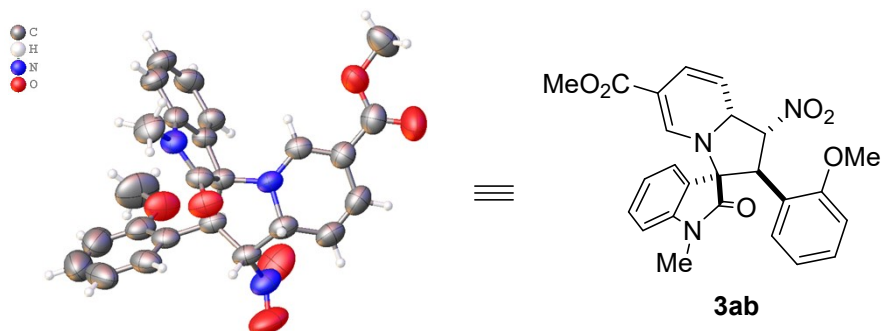

|                                    |                                                                               |
|------------------------------------|-------------------------------------------------------------------------------|
| Identification code                | <b>3ab</b>                                                                    |
| Empirical formula                  | C <sub>26</sub> H <sub>24</sub> Cl <sub>3</sub> N <sub>3</sub> O <sub>6</sub> |
| Formula weight                     | 580.83                                                                        |
| Temperature/K                      | 290.0                                                                         |
| Crystal system                     | monoclinic                                                                    |
| Space group                        | P2 <sub>1</sub> /n                                                            |
| a/Å                                | 15.6783(5)                                                                    |
| b/Å                                | 8.3762(2)                                                                     |
| c/Å                                | 21.0950(6)                                                                    |
| α/°                                | 90                                                                            |
| β/°                                | 101.617(2)                                                                    |
| γ/°                                | 90                                                                            |
| Volume/Å <sup>3</sup>              | 2713.54(13)                                                                   |
| Z                                  | 4                                                                             |
| ρ <sub>calc</sub> /cm <sup>3</sup> | 1.422                                                                         |
| μ/mm <sup>-1</sup>                 | 3.452                                                                         |
| F(000)                             | 1200.0                                                                        |
| Crystal size/mm <sup>3</sup>       | 0.4 × 0.2 × 0.1                                                               |
| Radiation                          | CuKα (λ = 1.54178)                                                            |
| 2θ range for data collection/°     | 6.442 to 127.872                                                              |
| Index ranges                       | -18 ≤ h ≤ 18, -9 ≤ k ≤ 8, -24 ≤ l ≤ 24                                        |
| Reflections collected              | 27635                                                                         |

|                                                |                                                                  |
|------------------------------------------------|------------------------------------------------------------------|
| Independent reflections                        | 4459 [ $R_{\text{int}} = 0.0734$ , $R_{\text{sigma}} = 0.0437$ ] |
| Data/restraints/parameters                     | 4459/0/376                                                       |
| Goodness-of-fit on $F^2$                       | 1.058                                                            |
| Final R indexes [ $I \geq 2\sigma(I)$ ]        | $R_1 = 0.0836$ , $wR_2 = 0.2221$                                 |
| Final R indexes [all data]                     | $R_1 = 0.1055$ , $wR_2 = 0.2474$                                 |
| Largest diff. peak/hole / $e \text{ \AA}^{-3}$ | 0.78/-0.37                                                       |

**Crystallization of 5ba:** The pure product **5ba** (30 mg) was dissolved in the mixture solvent of  $\text{CHCl}_3$  and petroleum ether (3 mL, 1:1, v/v) in a 10 mL vial. Then, the solution was allowed for slow evaporation to afford the crystal of **5ba** in a good quality for the for the crystallography analysis.

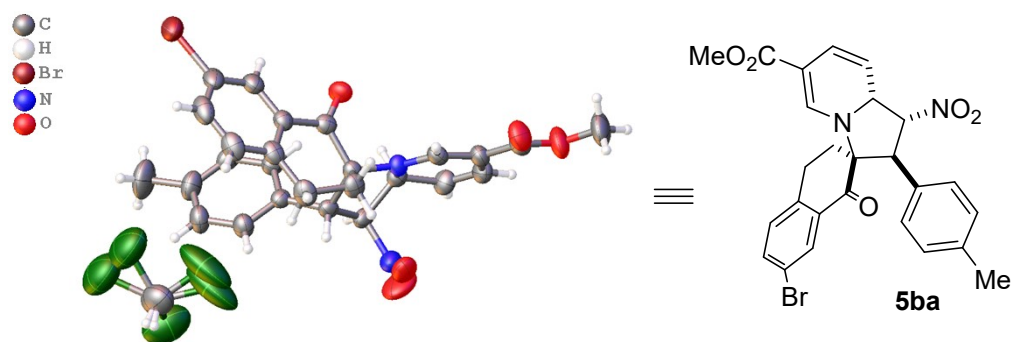

|                        |                                                               |
|------------------------|---------------------------------------------------------------|
| Identification code    | <b>5ba</b>                                                    |
| Empirical formula      | $\text{C}_{27}\text{H}_{24}\text{BrCl}_3\text{N}_2\text{O}_5$ |
| Formula weight         | 642.74                                                        |
| Temperature/K          | 293.15                                                        |
| Crystal system         | monoclinic                                                    |
| Space group            | P21/c                                                         |
| a/ $\text{\AA}$        | 13.953(2)                                                     |
| b/ $\text{\AA}$        | 12.3736(16)                                                   |
| c/ $\text{\AA}$        | 16.418(3)                                                     |
| $\alpha/^\circ$        | 90                                                            |
| $\beta/^\circ$         | 102.001(17)                                                   |
| $\gamma/^\circ$        | 90                                                            |
| Volume/ $\text{\AA}^3$ | 2772.7(8)                                                     |
| Z                      | 4                                                             |

|                                                |                                                              |
|------------------------------------------------|--------------------------------------------------------------|
| $\rho_{\text{calc}}/\text{cm}^3$               | 1.540                                                        |
| $\mu/\text{mm}^{-1}$                           | 1.812                                                        |
| F(000)                                         | 1304.0                                                       |
| Crystal size/ $\text{mm}^3$                    | $0.35 \times 0.3 \times 0.25$                                |
| Radiation                                      | MoK $\alpha$ ( $\lambda = 0.71073$ )                         |
| $2\theta$ range for data collection/ $^\circ$  | 5.97 to 52.744                                               |
| Index ranges                                   | $-14 \leq h \leq 17, -14 \leq k \leq 15, -16 \leq l \leq 20$ |
| Reflections collected                          | 12437                                                        |
| Independent reflections                        | 5673 [Rint = 0.0262, Rsigma = 0.0518]                        |
| Data/restraints/parameters                     | 5673/0/352                                                   |
| Goodness-of-fit on F2                          | 1.044                                                        |
| Final R indexes [ $I \geq 2\sigma(I)$ ]        | R1 = 0.0639, wR2 = 0.1622                                    |
| Final R indexes [all data]                     | R1 = 0.1126, wR2 = 0.1907                                    |
| Largest diff. peak/hole / $e \text{ \AA}^{-3}$ | 0.82/-0.80                                                   |

- [1] A. F. McAnda, K. D. Roberts, A. J. Smallridge, A. Ten and M. A. Trehwella, Mechanism of the yeast mediated reduction of nitrostyrenes in light petroleum, *J. Chem. Soc., Perkin Trans. 1*, **1998**, 29, 501.
- [2] P.-F. Zheng, Q. Ouyang, S.-L. Niu, L. Shuai, Y. Yuan, K. Jiang, T.-Y. Liu, and Y.-C. Chen, Enantioselective [4 + 1] Annulation Reactions of  $\alpha$ -Substituted Ammonium Ylides To Construct Spirocyclic Oxindoles, *J. Am. Chem. Soc.*, **2015**, 137, 9390.
- [3] K. Tanemura, T. Suzuki, Y. Nishida, K. Satsumabayashia and T. Horaguchib, A mild and efficient procedure for  $\alpha$ -bromination of ketones using *N*-bromosuccinimide catalysed by ammonium acetate, *Chem. Commun.*, **2004**, 35, 470.

# 10. NMR spectra

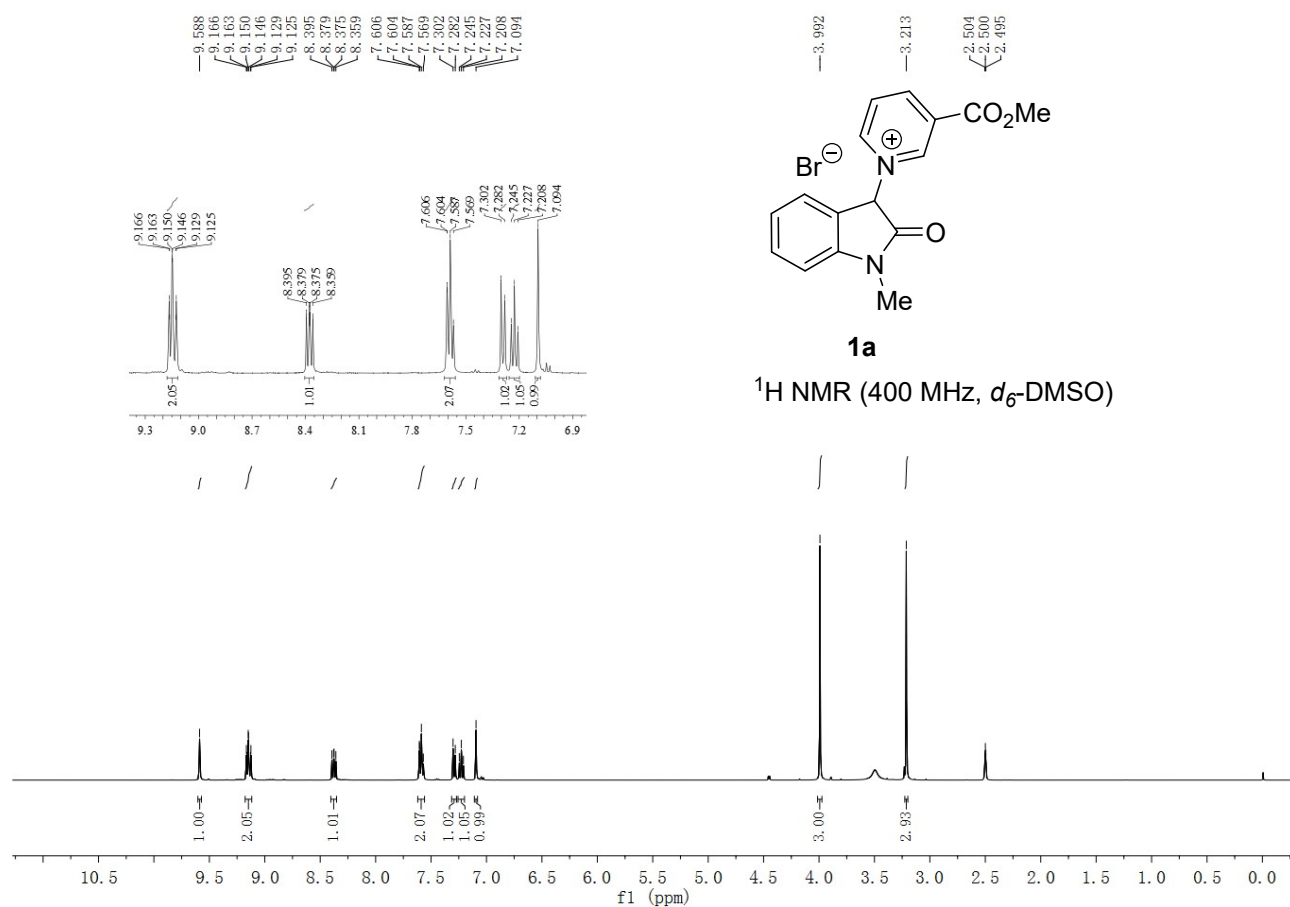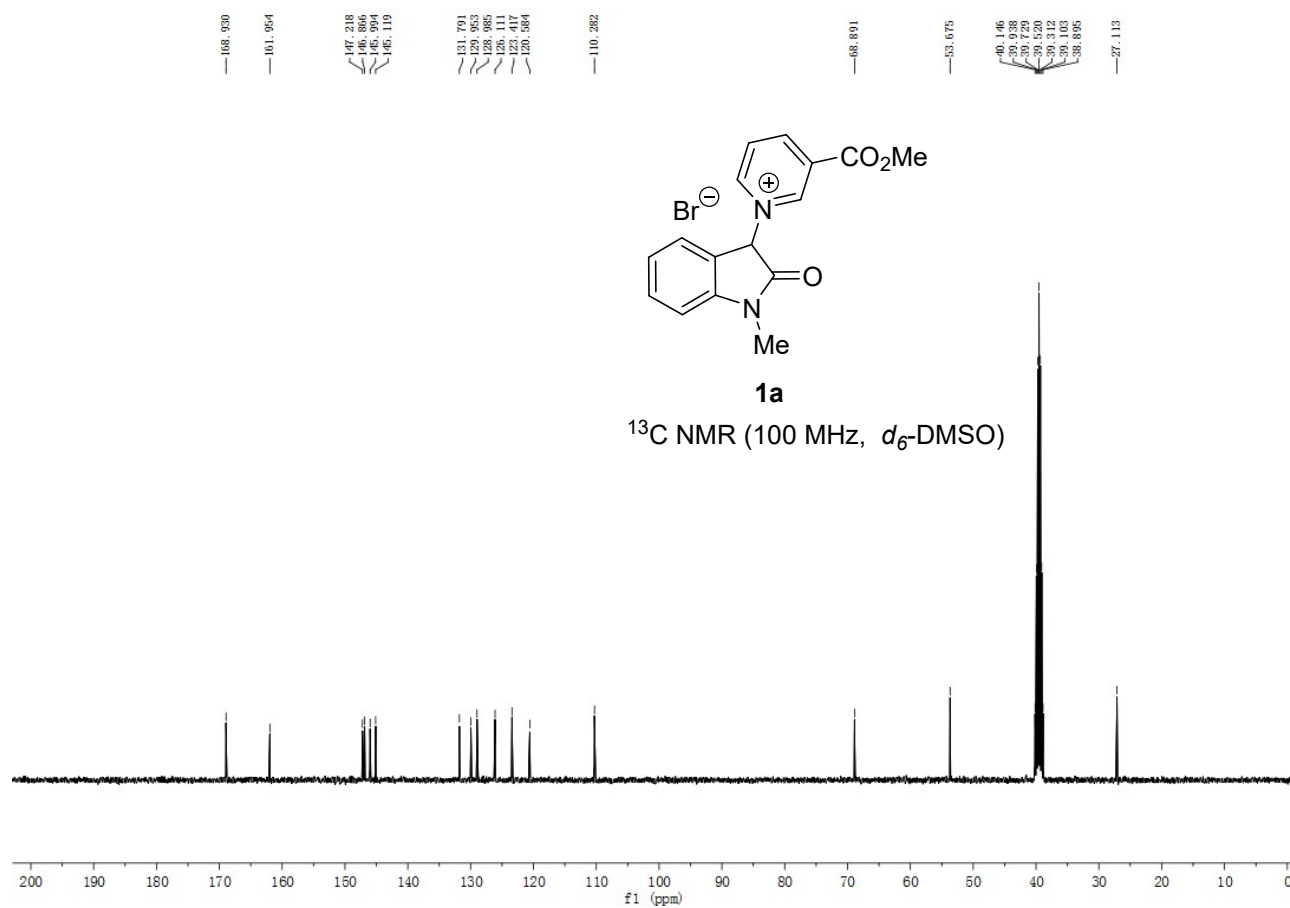

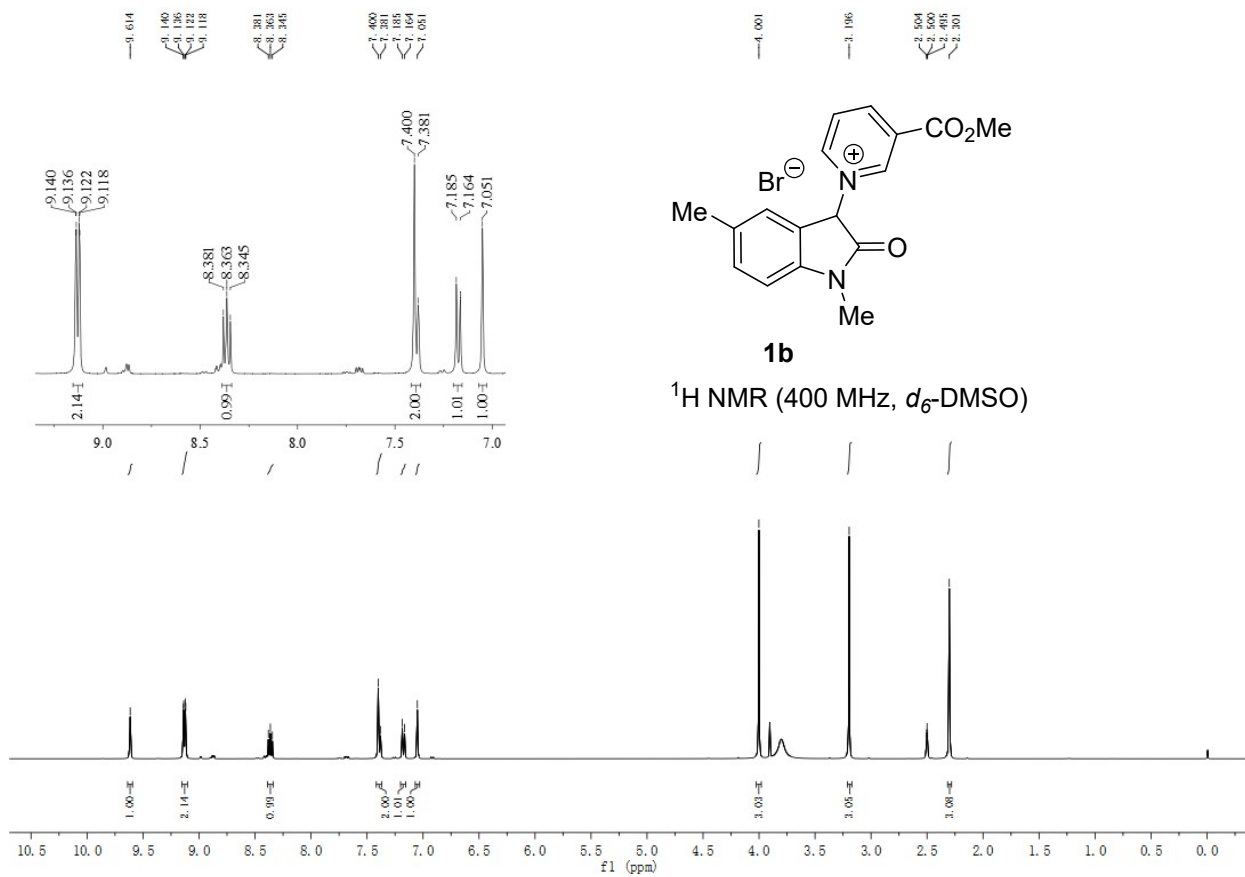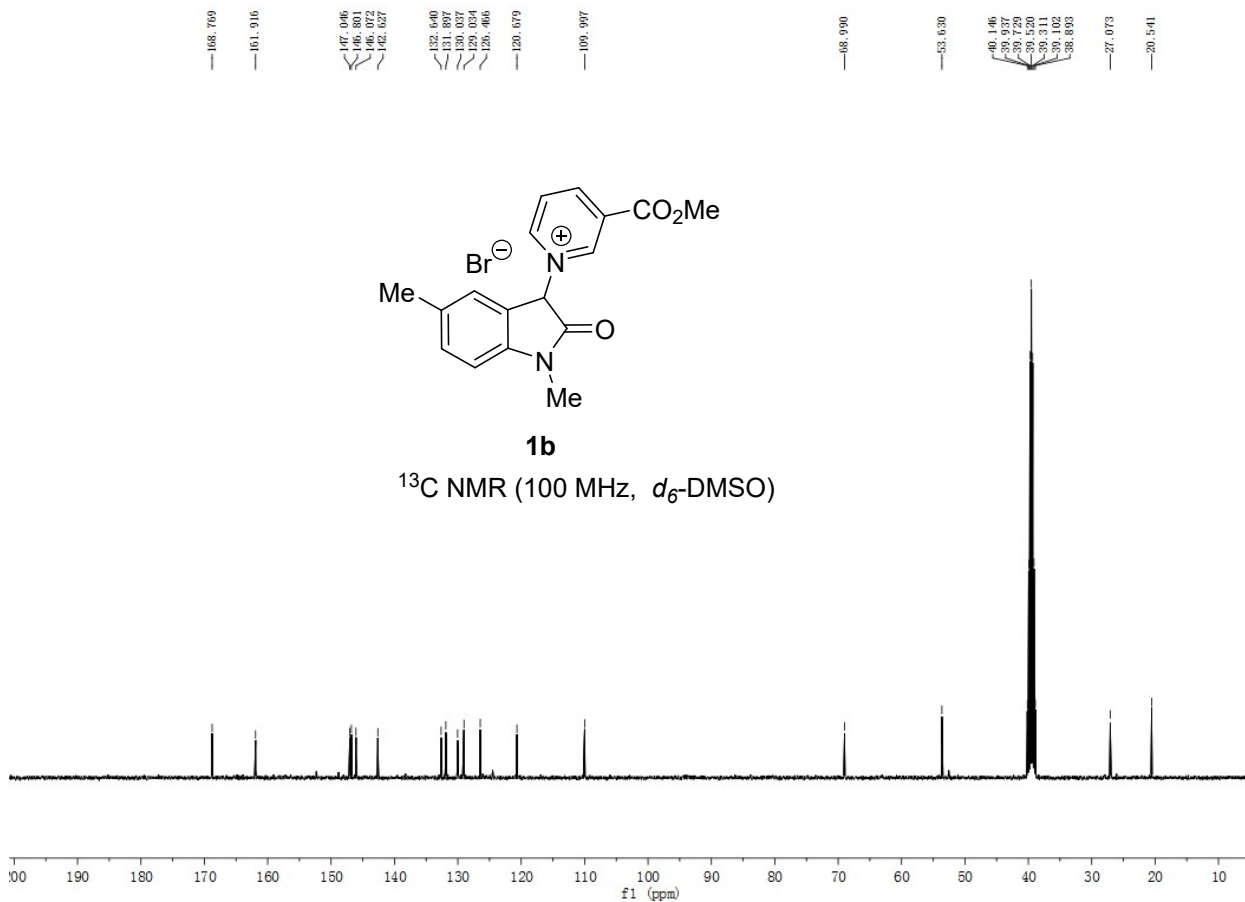

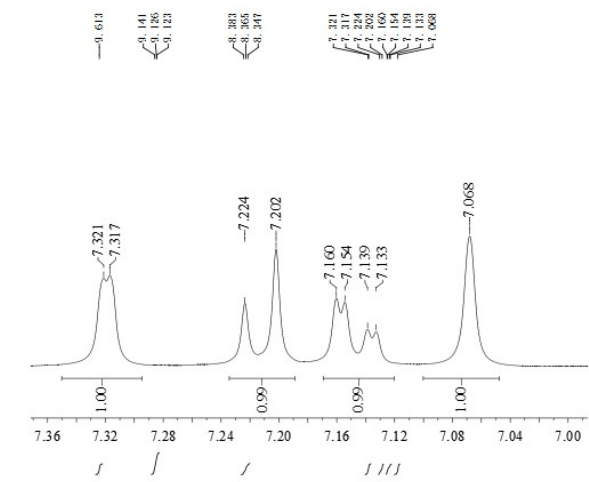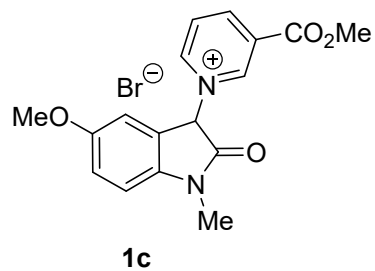

$^1\text{H NMR}$  (400 MHz,  $d_6$ -DMSO)

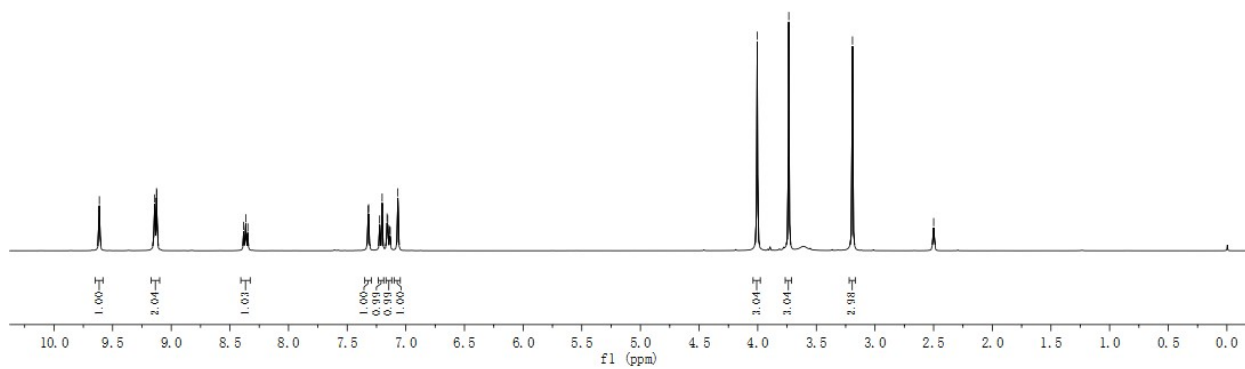

108.539, 161.922, 155.976, 147.078, 146.708, 146.127, 138.221, 129.959, 129.906, 121.580, 116.409, 116.354, 110.865, 69.124, 55.780, 53.622, 40.146, 39.937, 39.729, 39.520, 39.311, 39.102, 38.894, 27.114

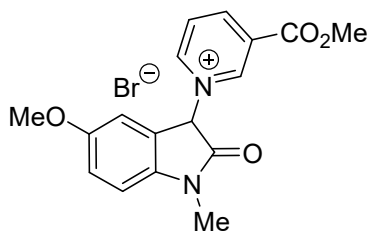

$^{13}\text{C NMR}$  (100 MHz,  $d_6$ -DMSO)

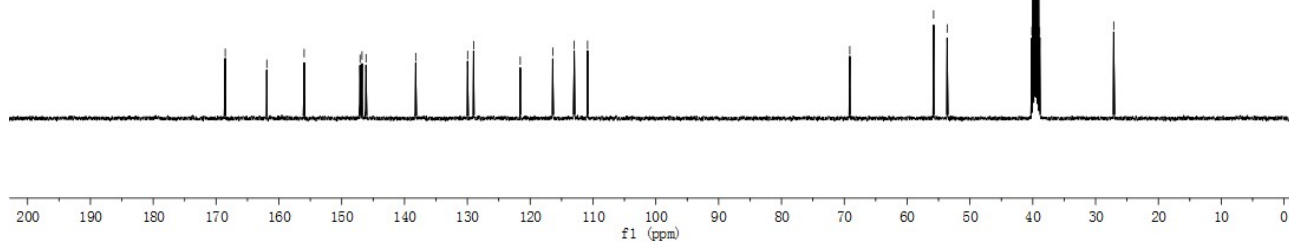



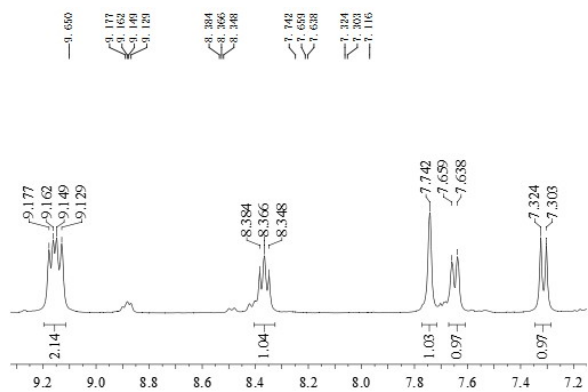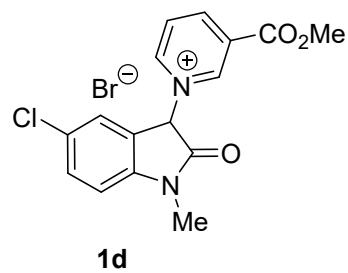

<sup>1</sup>H NMR (400 MHz, *d*<sub>6</sub>-DMSO)

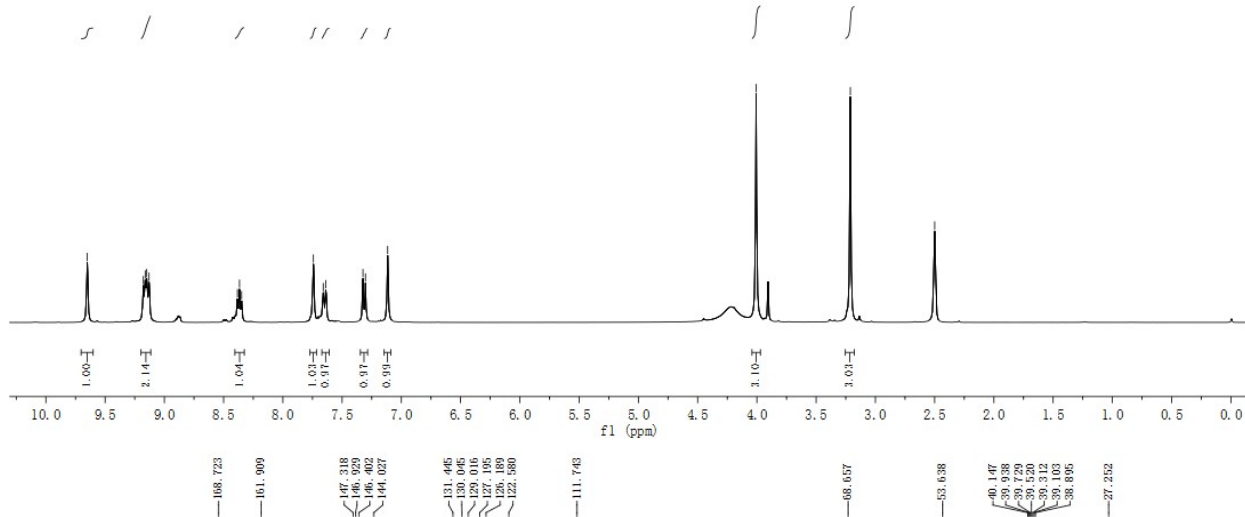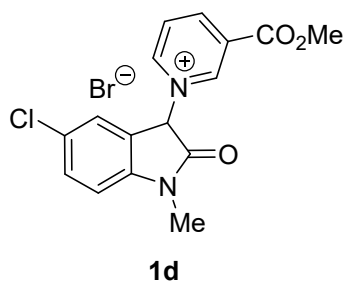

<sup>13</sup>C NMR (100 MHz, *d*<sub>6</sub>-DMSO)

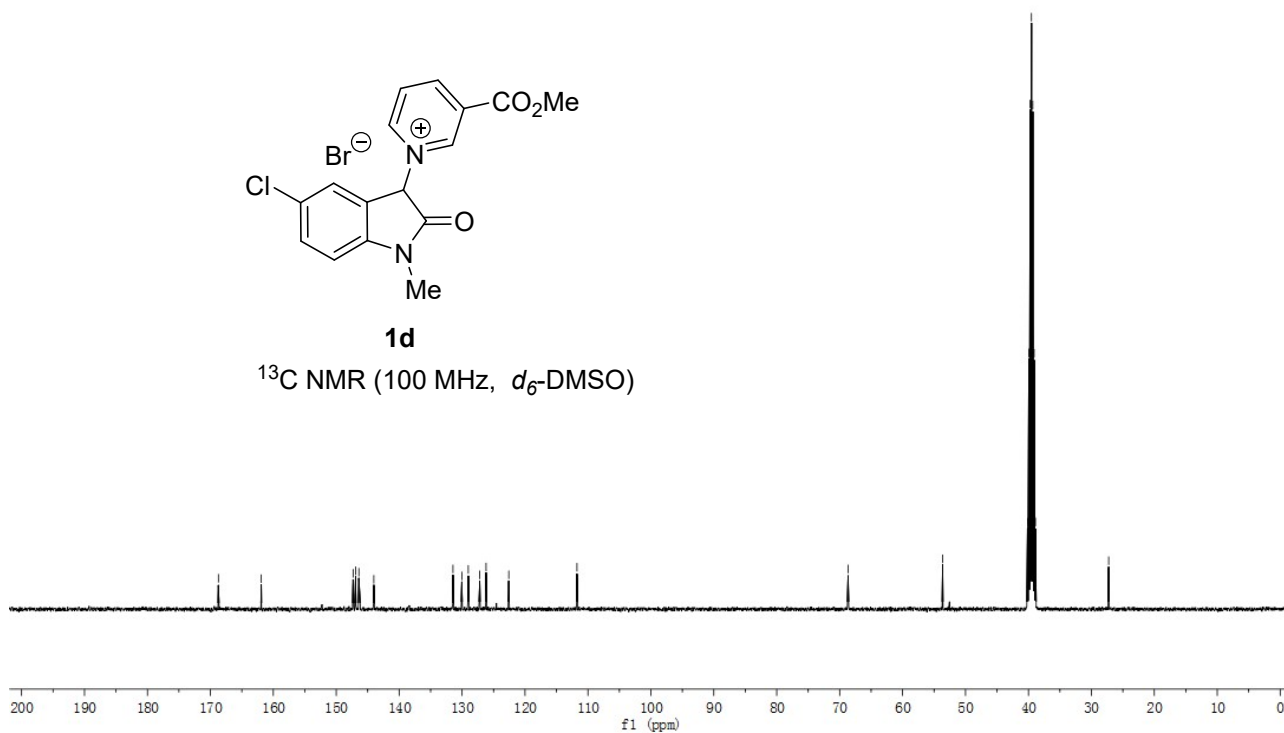

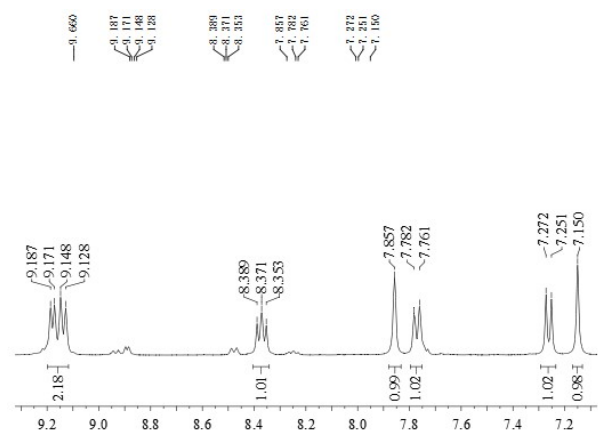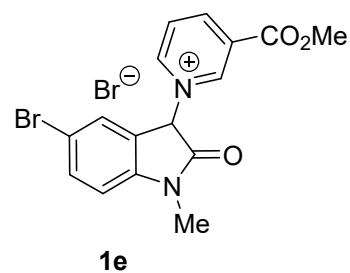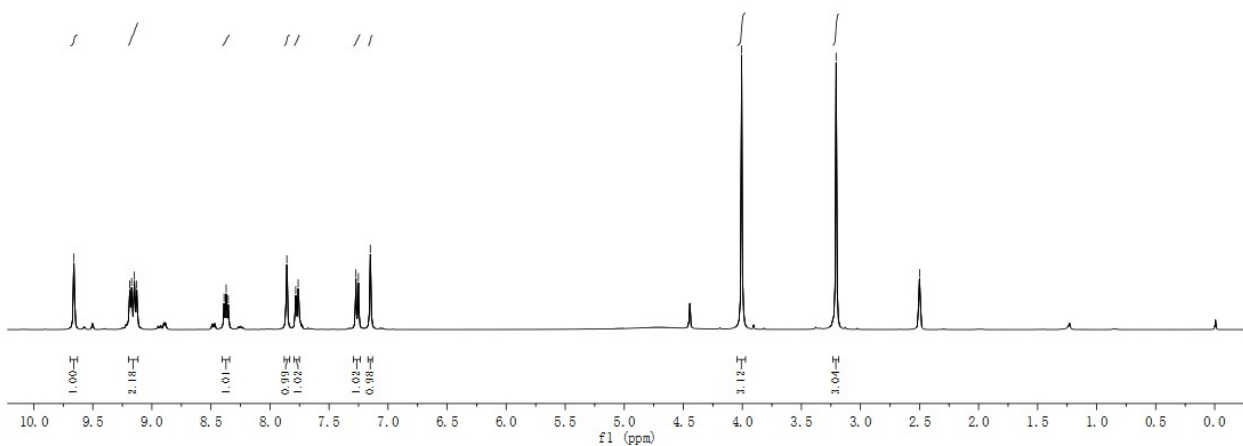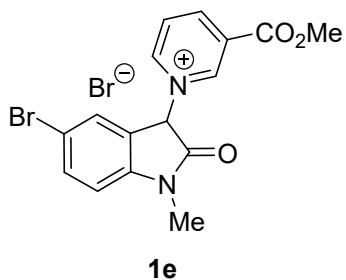

**<sup>13</sup>C NMR (100 MHz, *d*<sub>6</sub>-DMSO)**

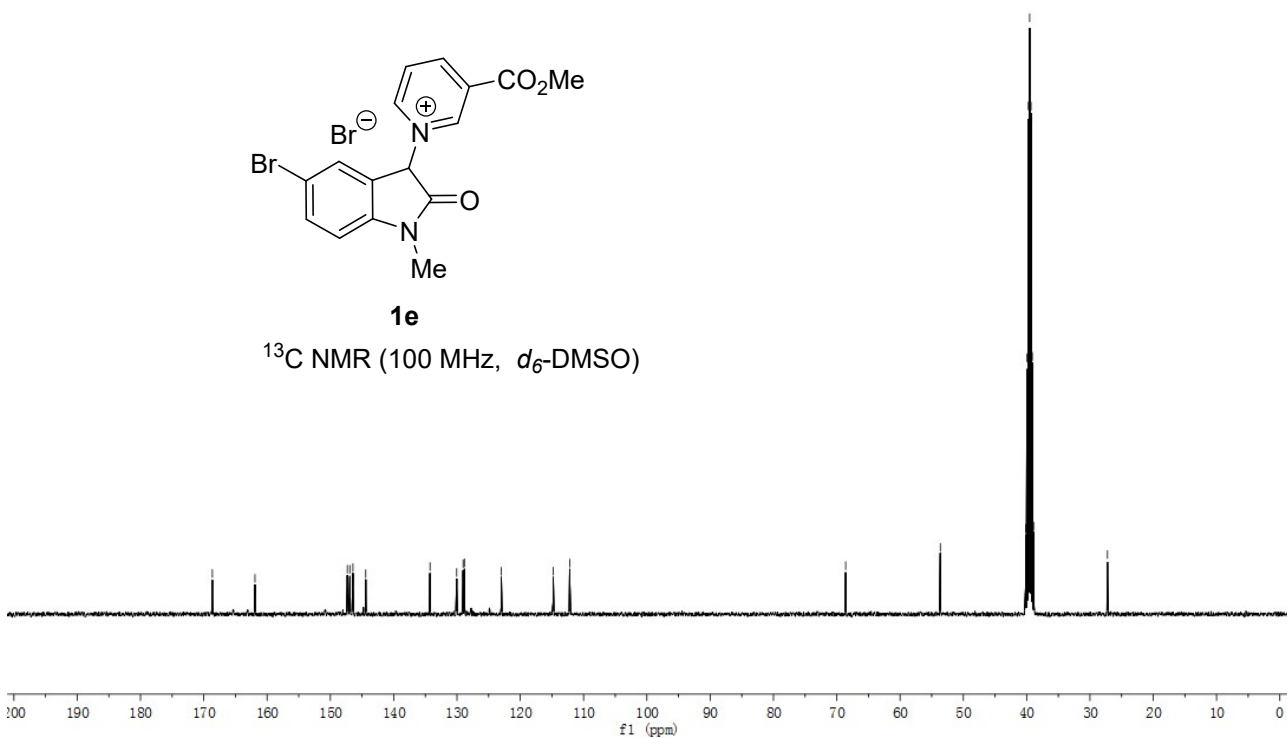

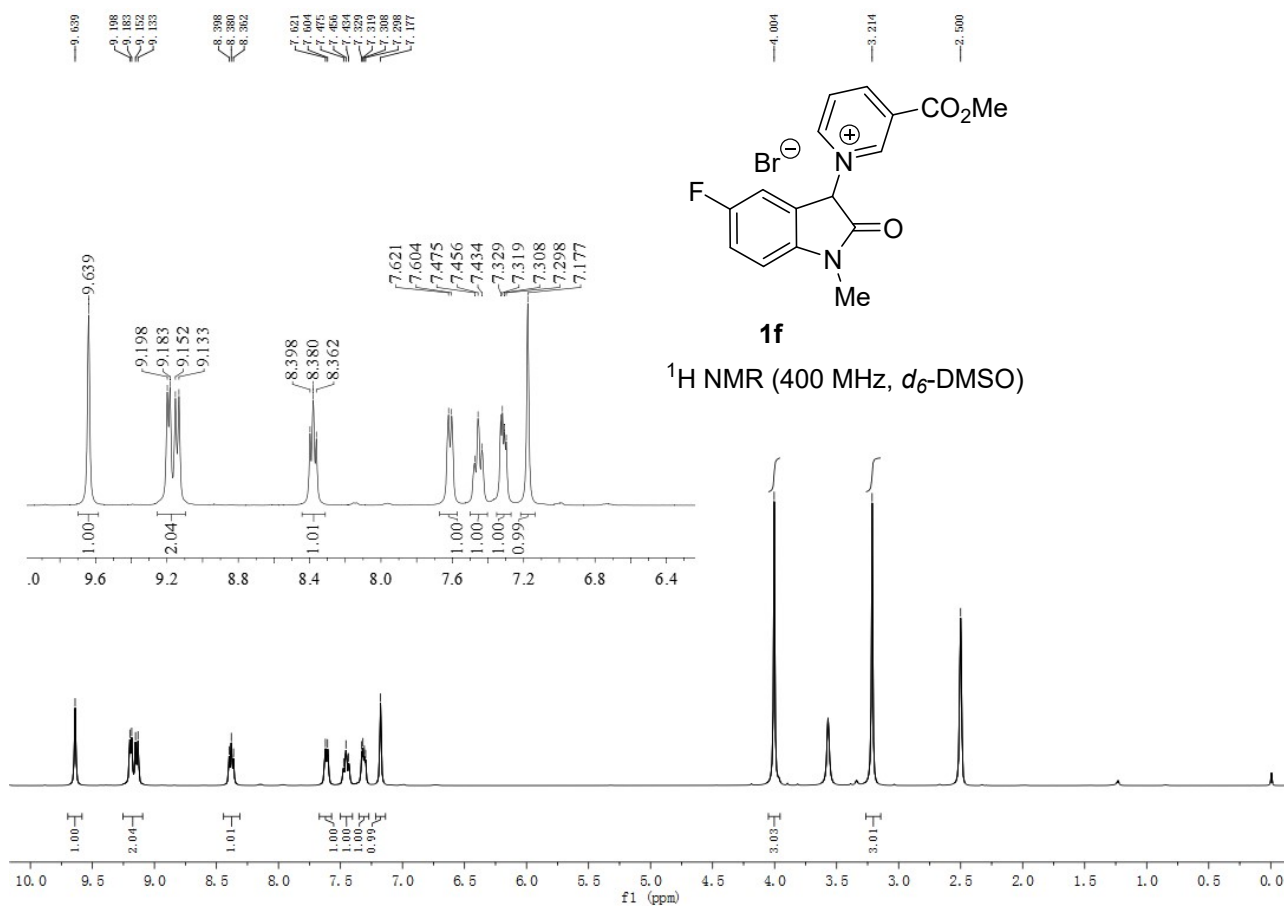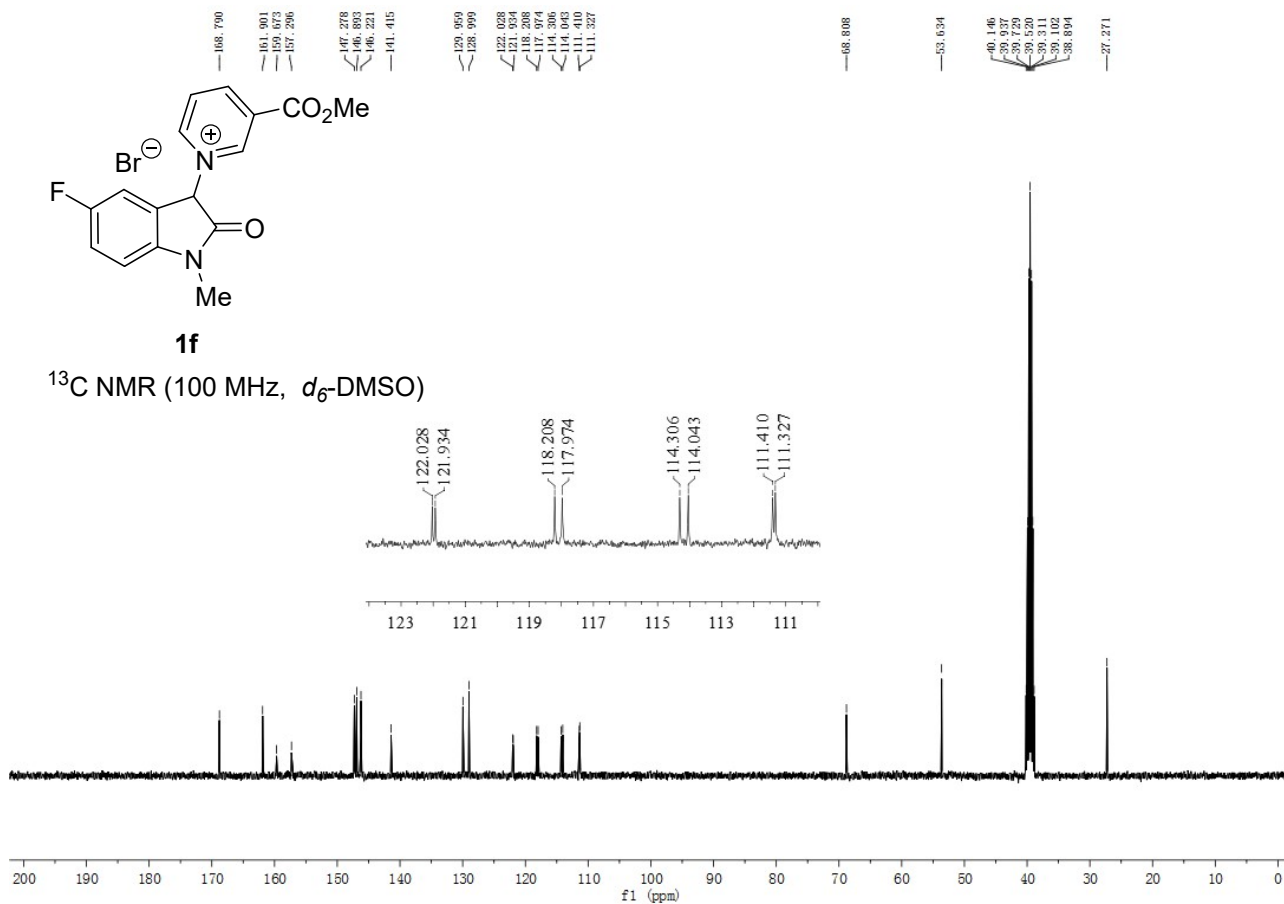

119.383  
119.396  
119.416  
119.427  
119.438

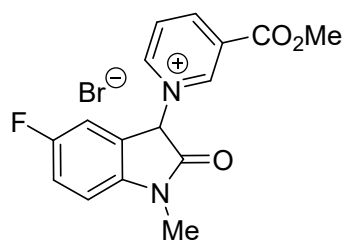

**1f**

$^{19}\text{F}$  NMR (376 MHz,  $d_6$ -DMSO)

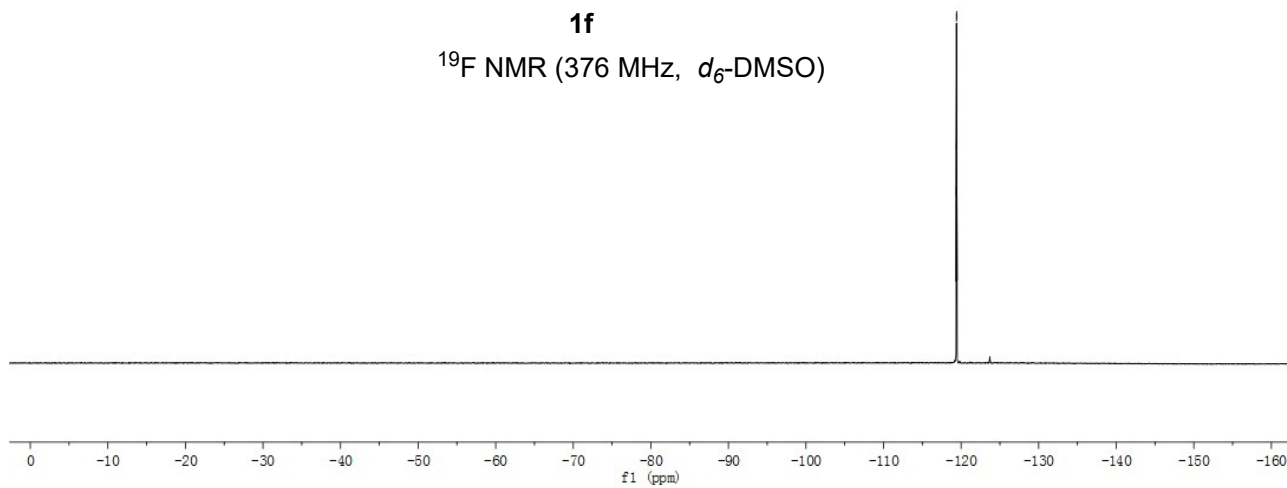

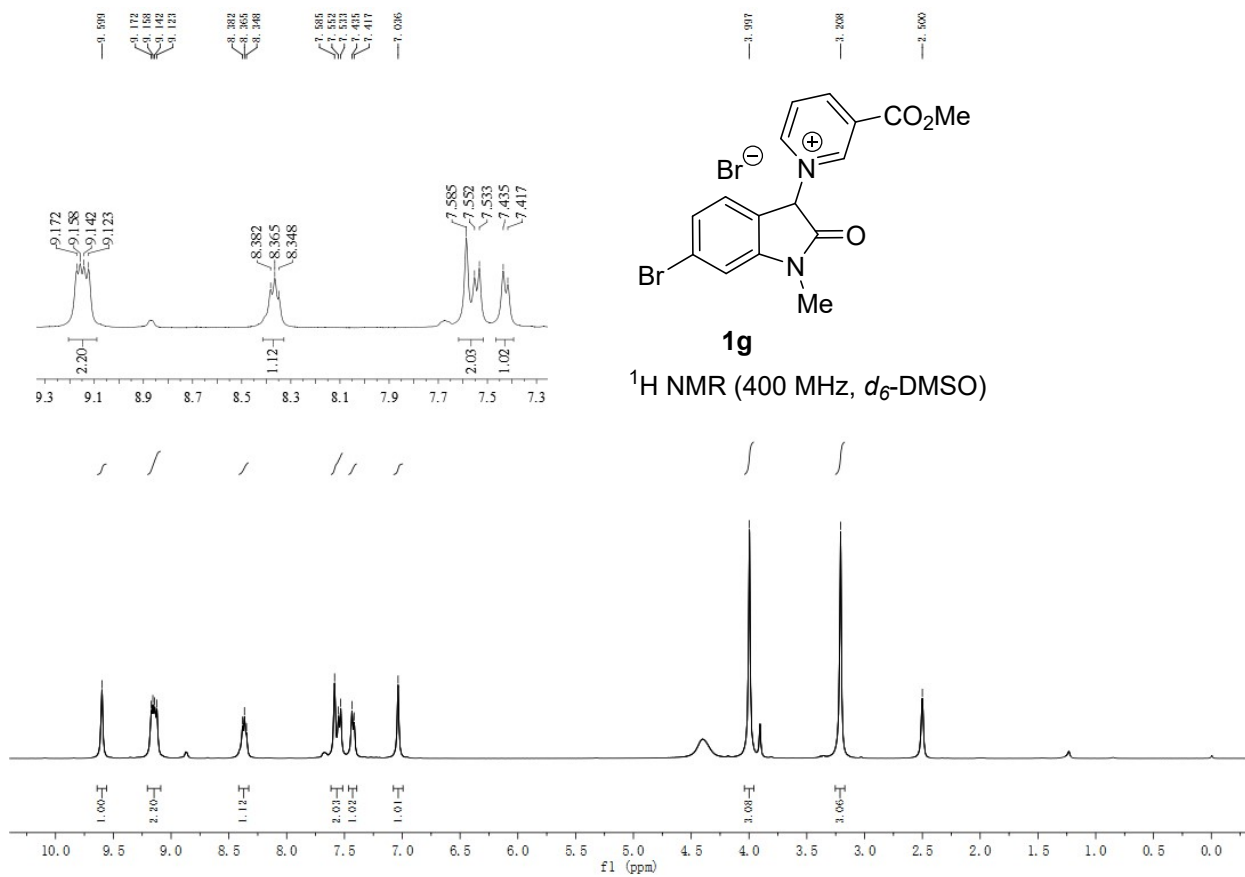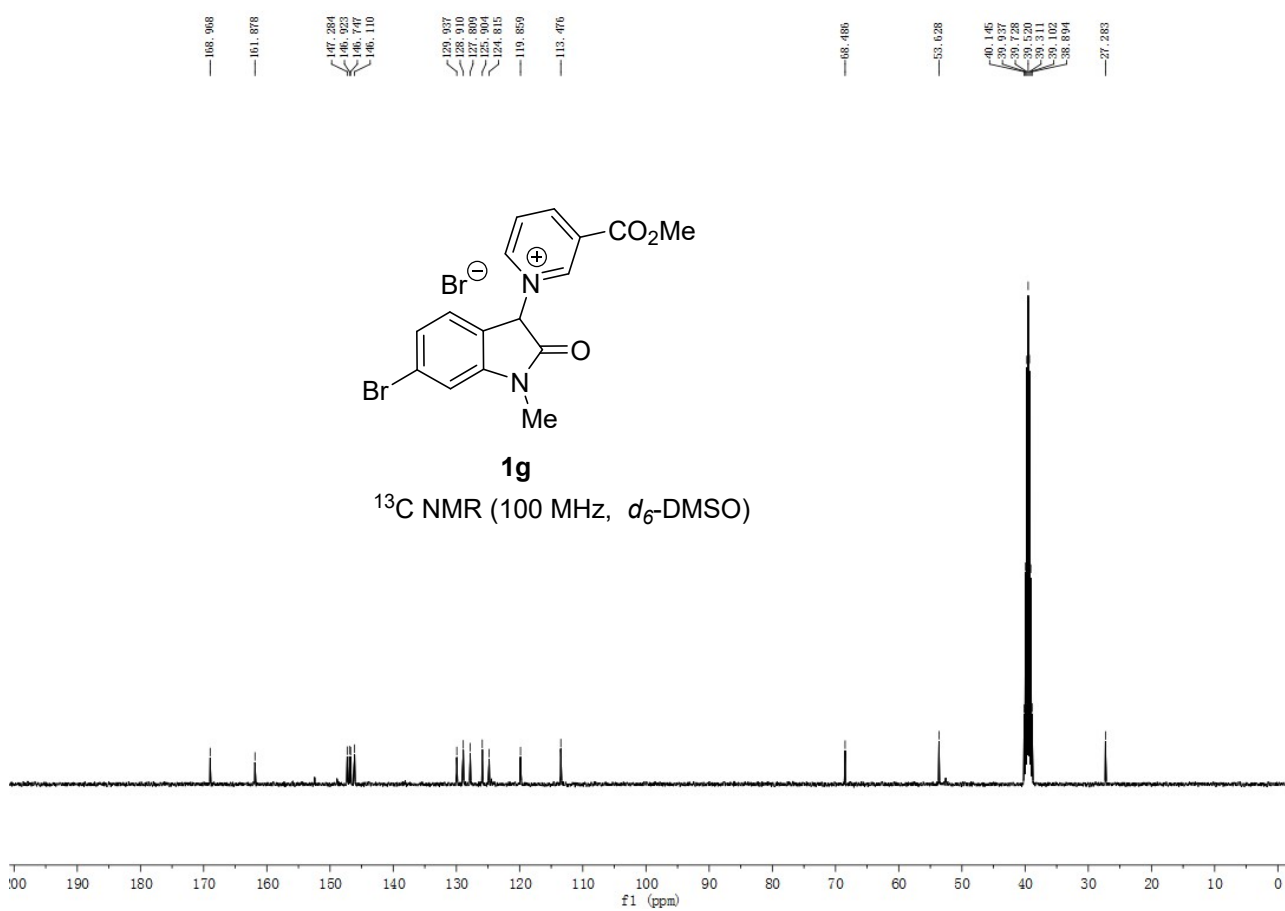

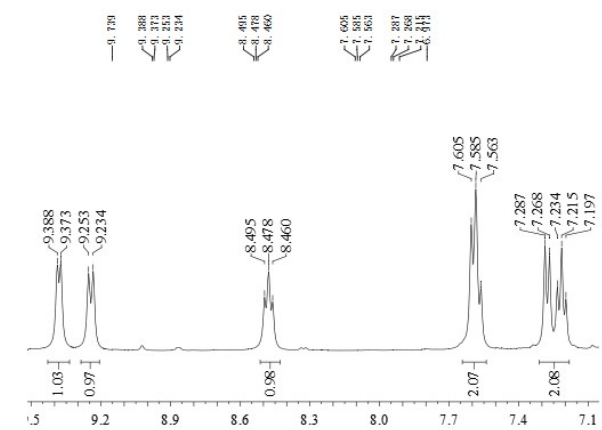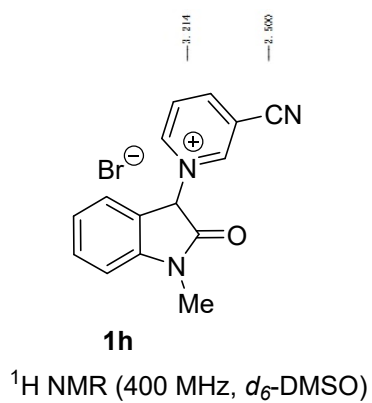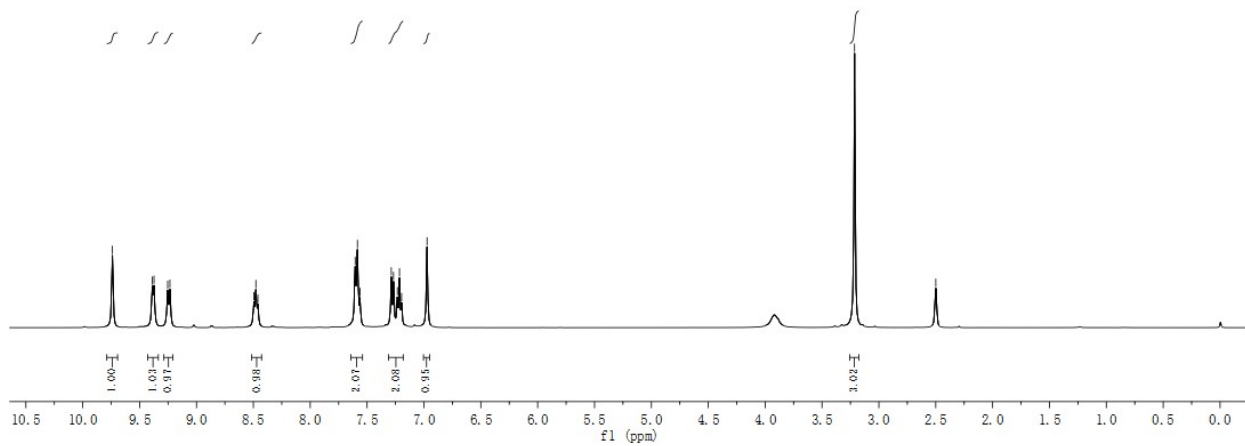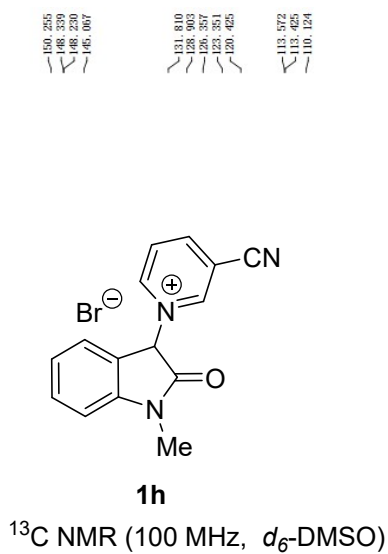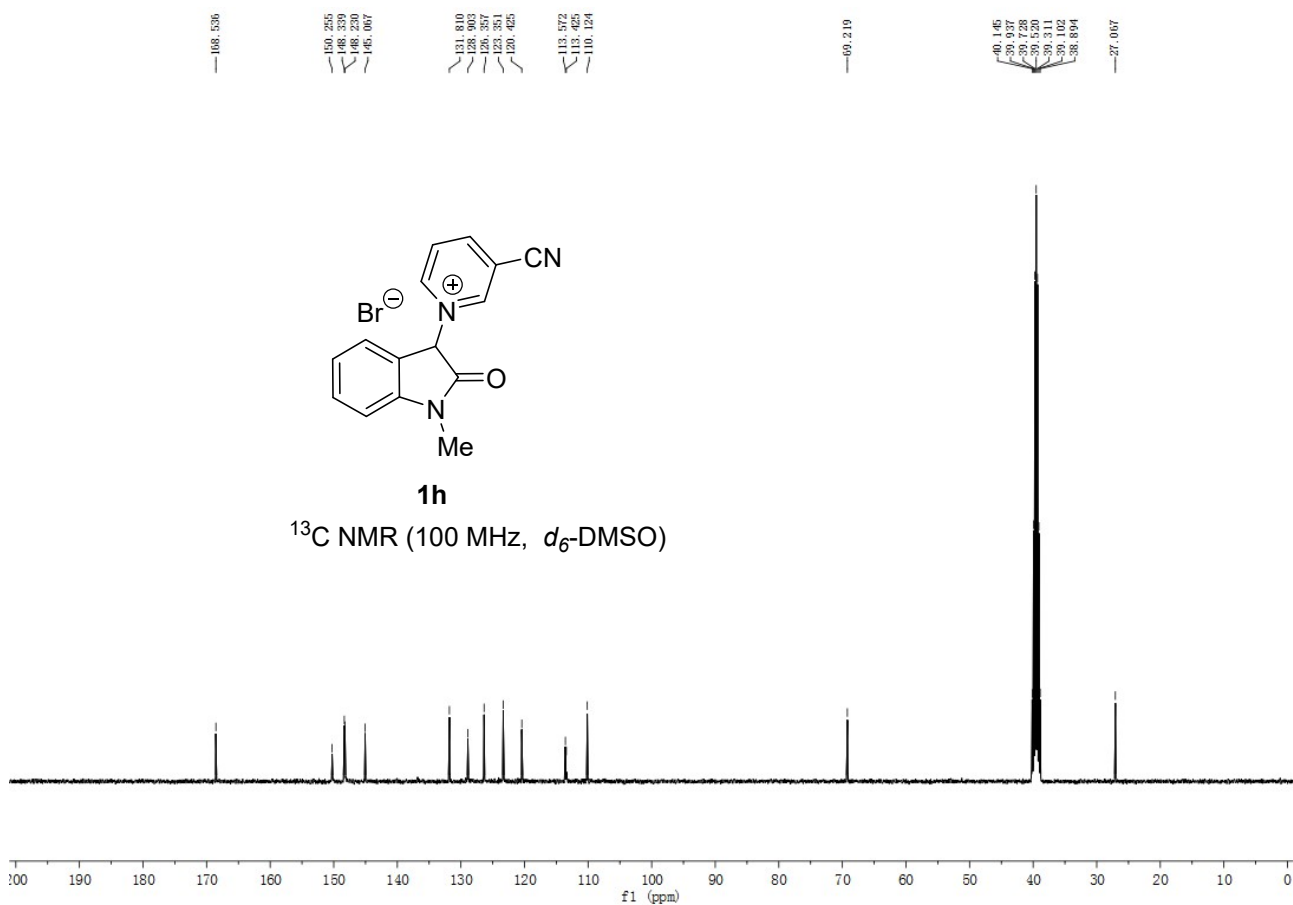

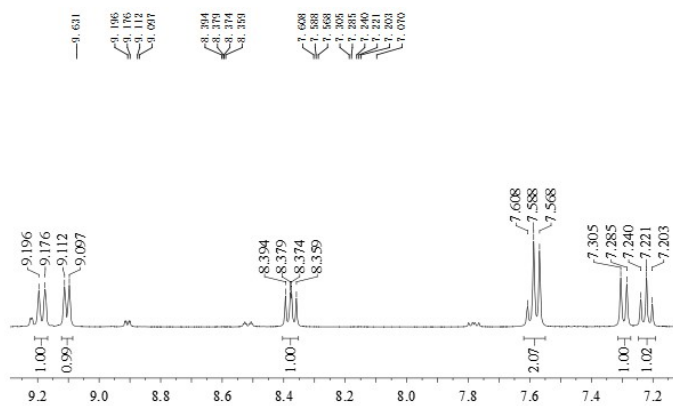

**1i**  
<sup>1</sup>H NMR (400 MHz, *d*<sub>6</sub>-DMSO)

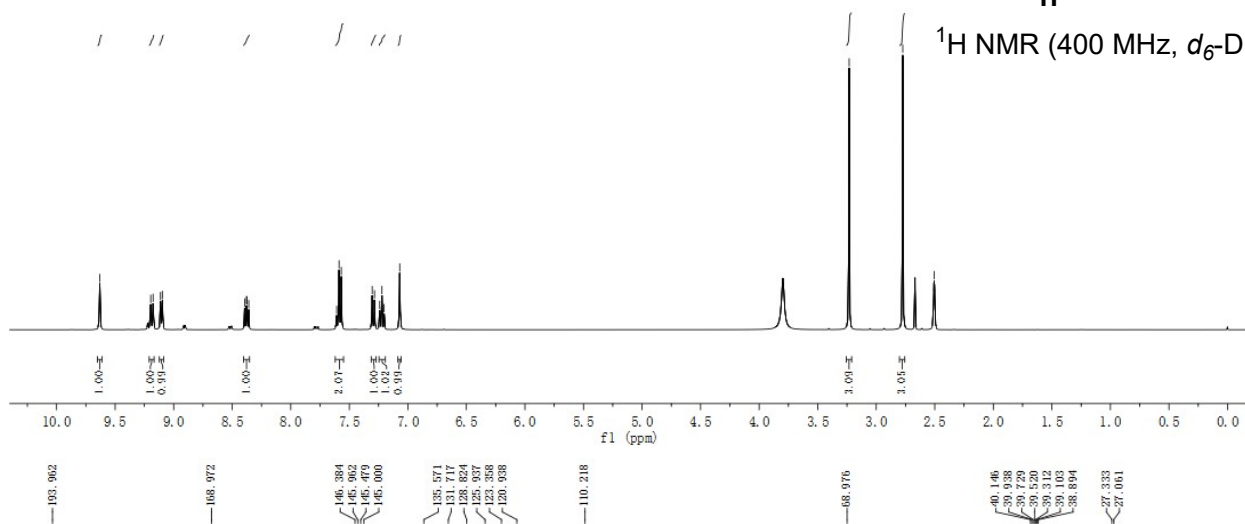

**1i**  
<sup>13</sup>C NMR (100 MHz, *d*<sub>6</sub>-DMSO)

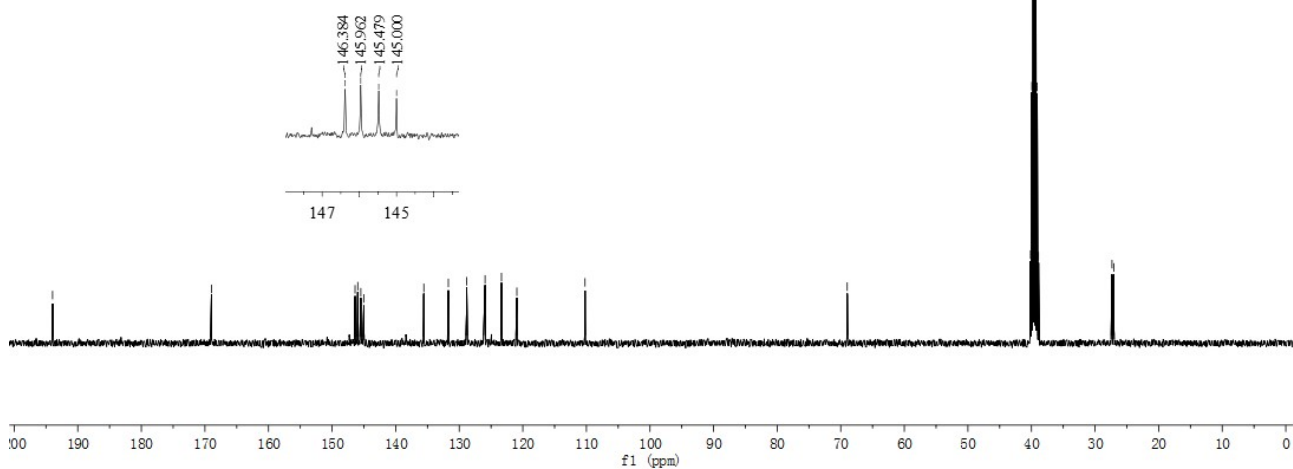

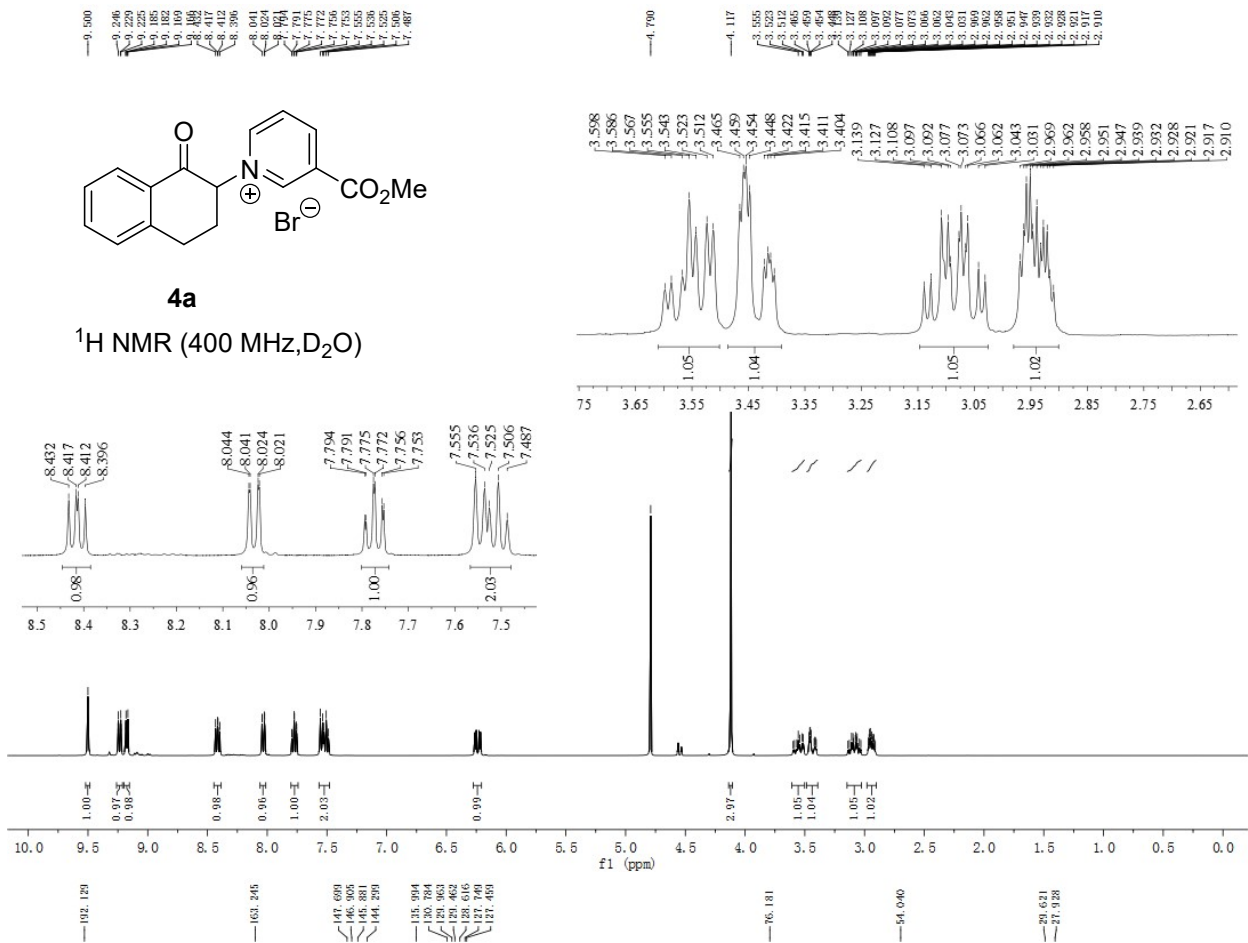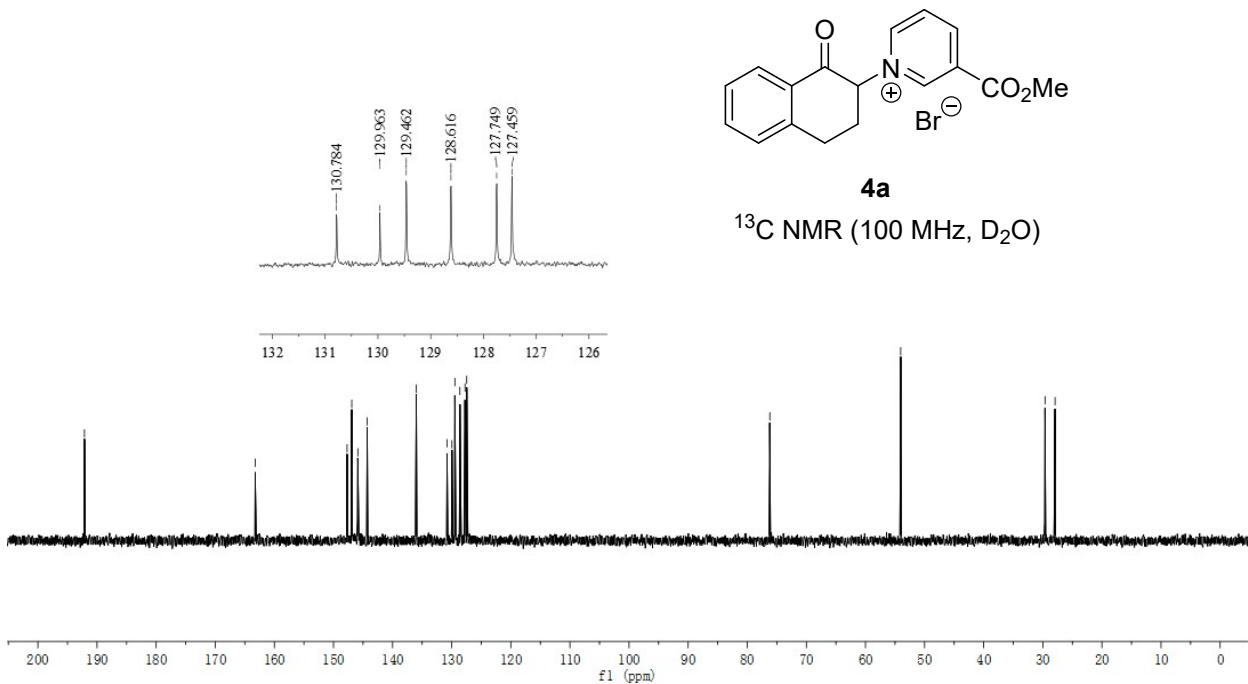



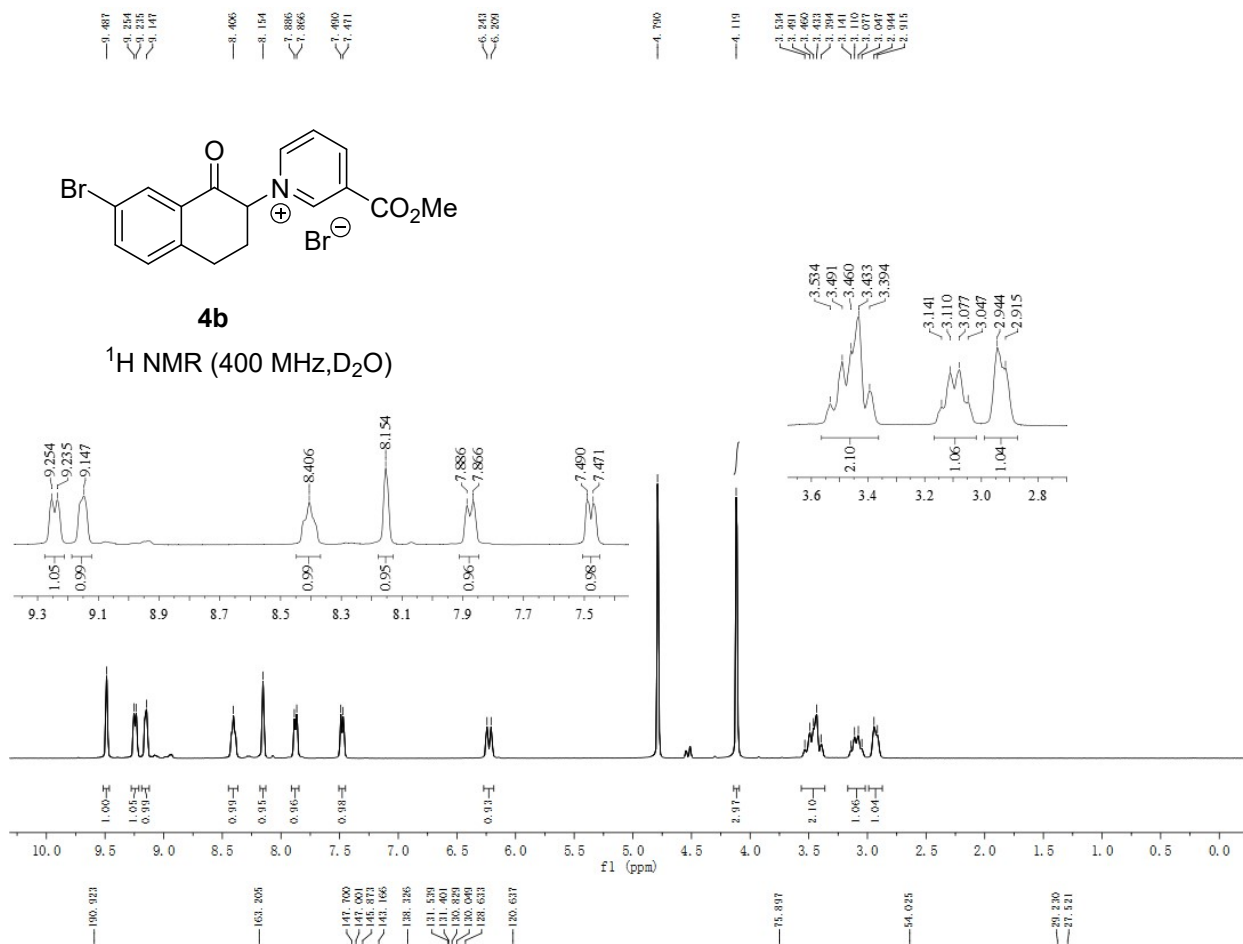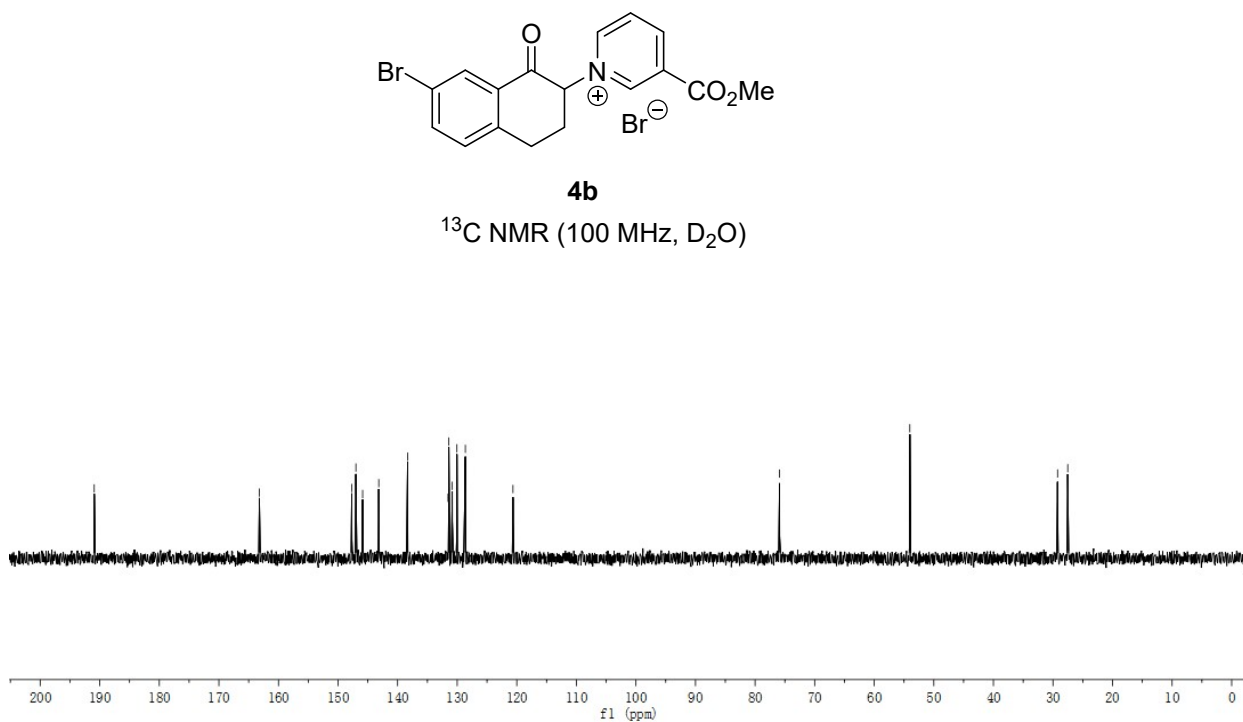

-9.478  
 -9.238  
 -9.218  
 -9.150  
 -9.136  
 -8.408  
 -8.390  
 -8.371  
 -8.029  
 -8.007  
 -7.041  
 -6.142  
 -6.116  
 -6.108  
 -4.790  
 -4.114  
 -3.992  
 -3.528  
 -3.495  
 -3.462  
 -3.403  
 -3.381  
 -3.059  
 -3.026  
 -2.996  
 -2.907

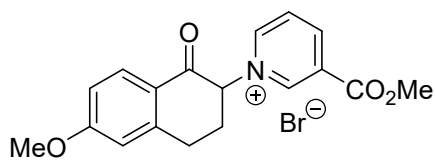

**4c**

<sup>1</sup>H NMR (400 MHz, D<sub>2</sub>O)

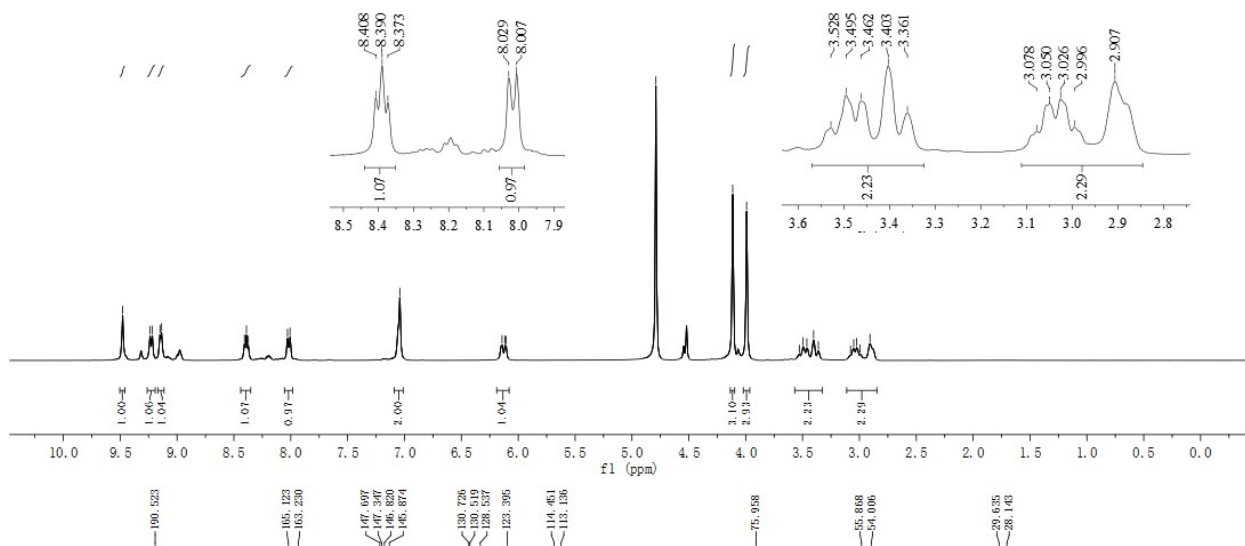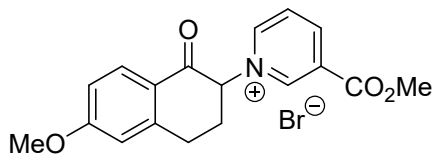

**4c**

<sup>13</sup>C NMR (100 MHz, D<sub>2</sub>O)

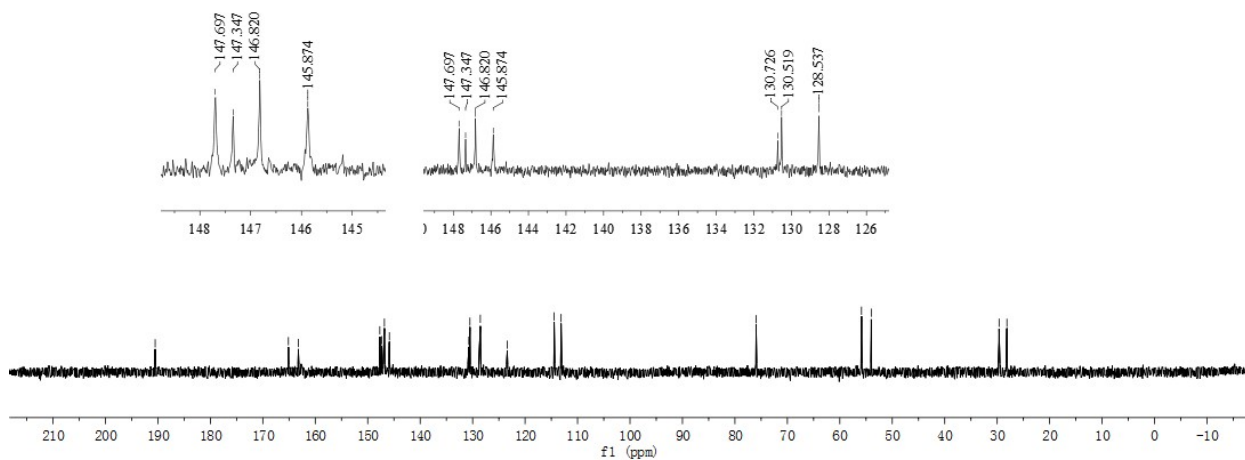

8.437  
 8.423  
 8.414  
 8.443  
 8.428  
 8.423  
 8.407  
 8.034  
 8.026  
 8.016  
 7.793  
 7.775  
 7.759  
 7.756  
 7.590  
 7.574  
 7.529  
 7.510  
 7.481  
 6.372  
 6.365  
 6.237  
 6.225

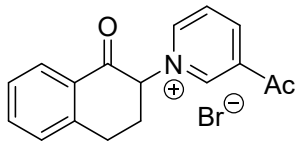

**4d**

<sup>1</sup>H NMR (400 MHz, D<sub>2</sub>O)

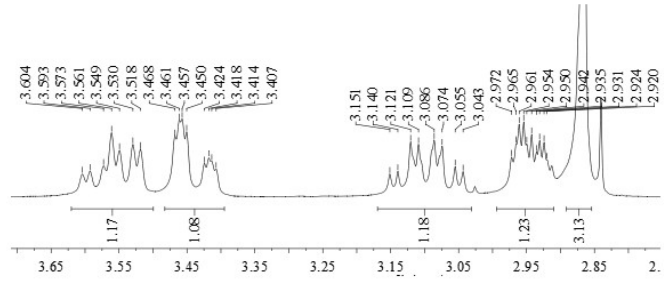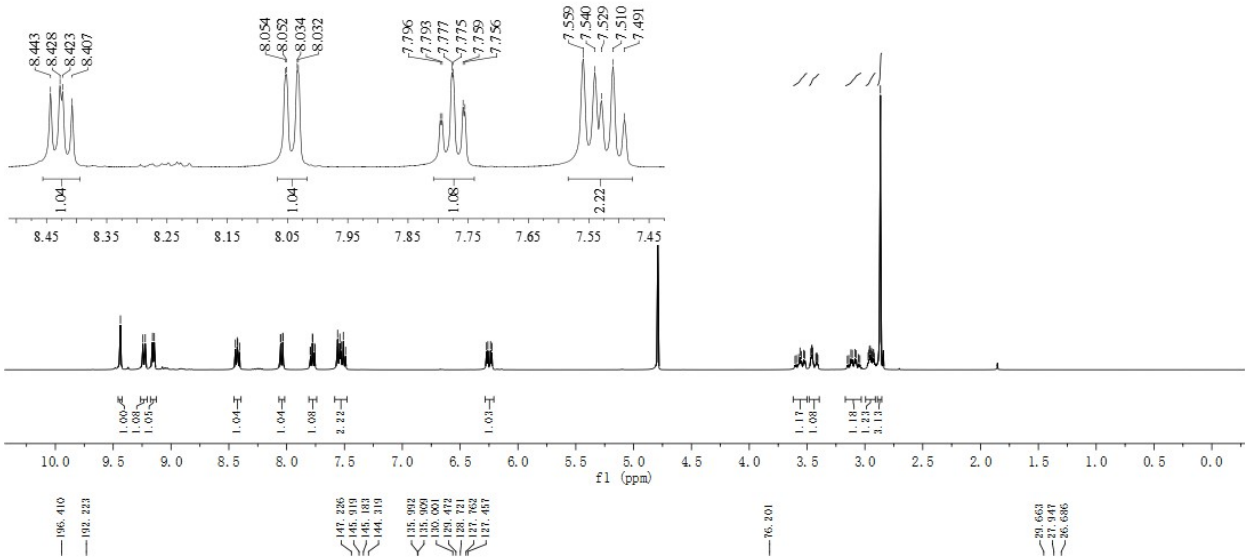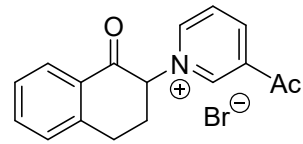

**4d**

<sup>13</sup>C NMR (100 MHz, D<sub>2</sub>O)

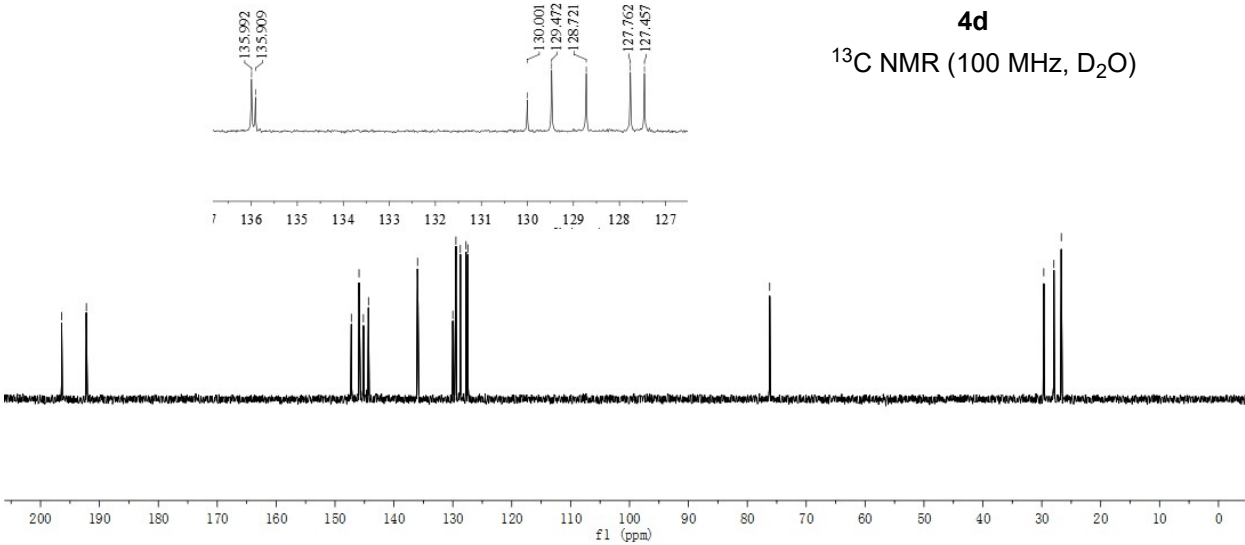

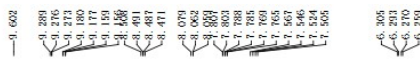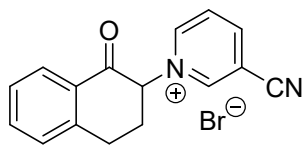

**4e**

<sup>1</sup>H NMR (400 MHz, D<sub>2</sub>O)

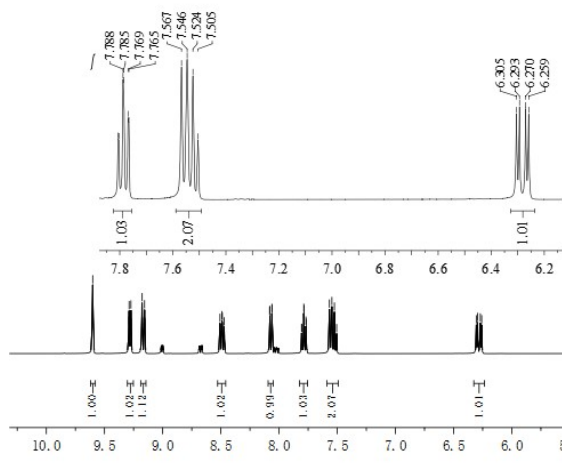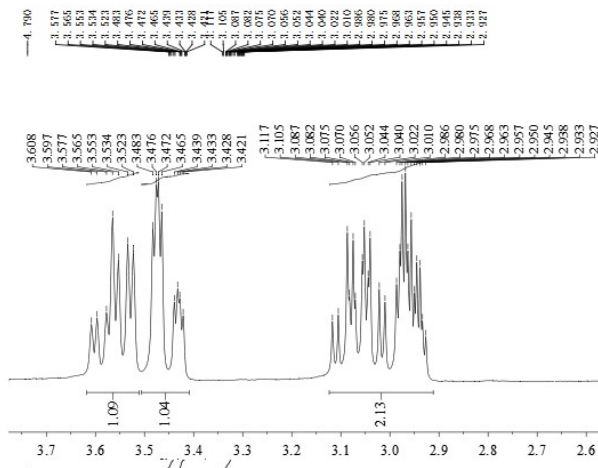

191.545

150.061  
148.538  
148.422  
144.270  
136.071  
129.873  
129.467  
129.014  
127.868  
127.508  
114.134  
113.304

76.525

29.470  
27.863

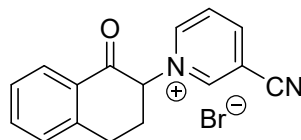

**4e**

<sup>13</sup>C NMR (100 MHz, D<sub>2</sub>O)

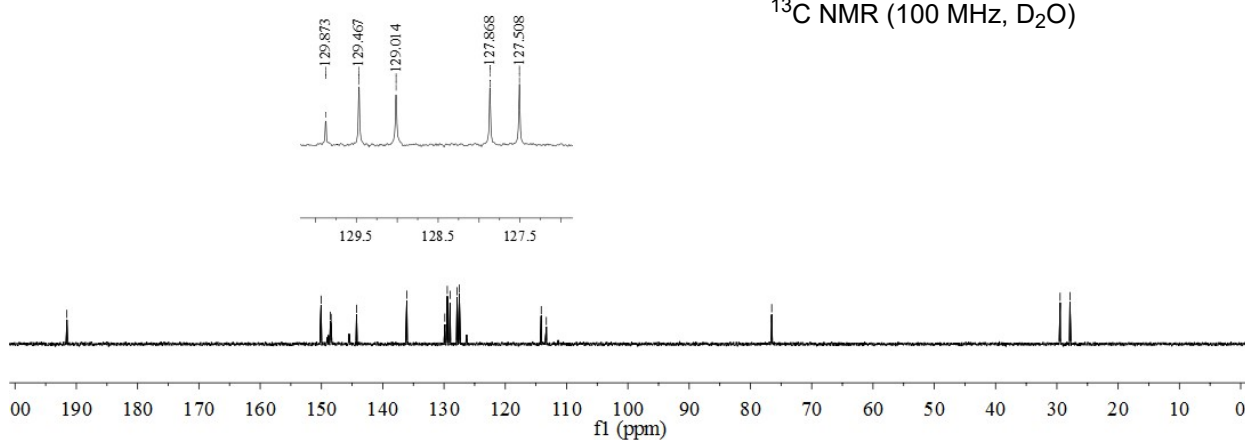

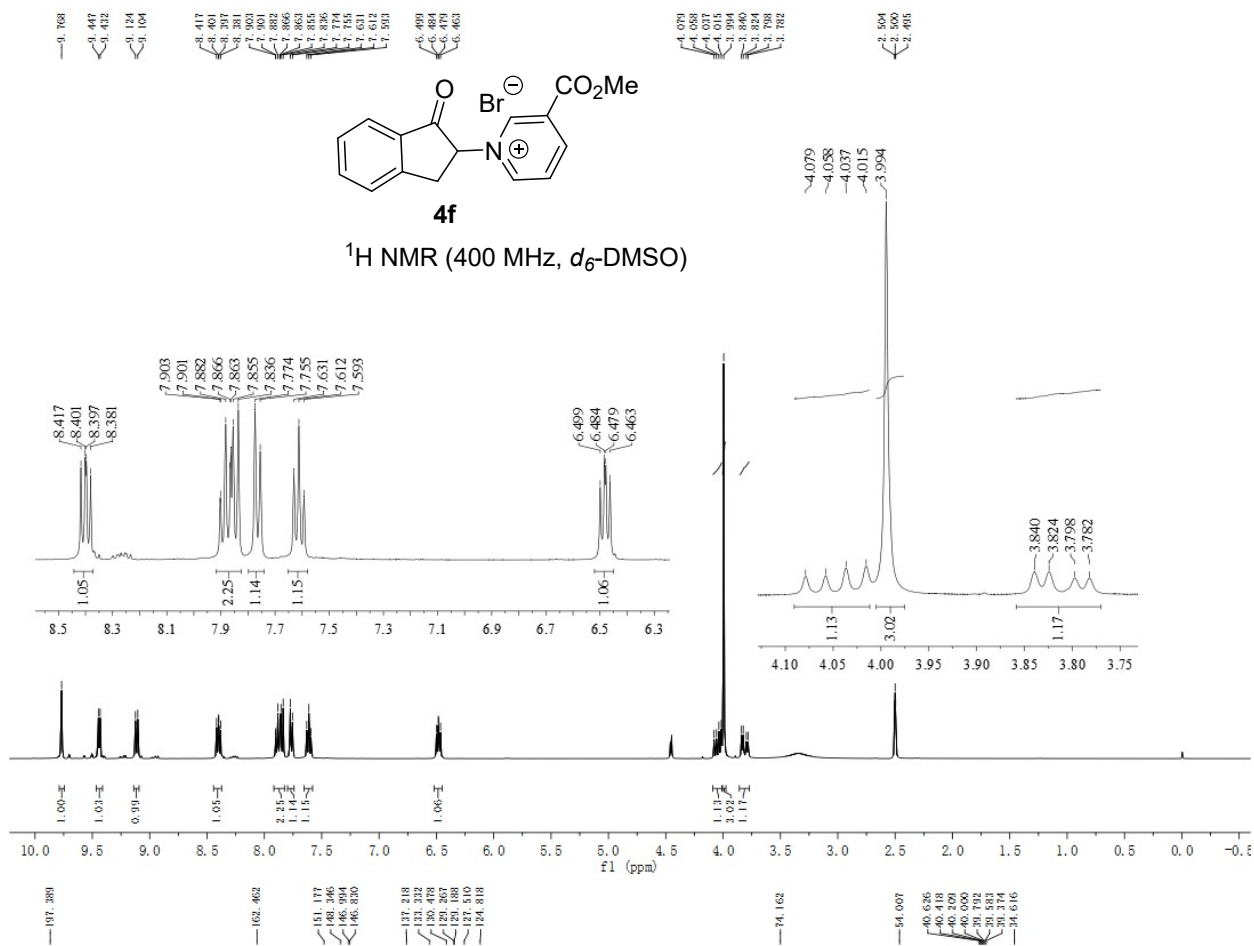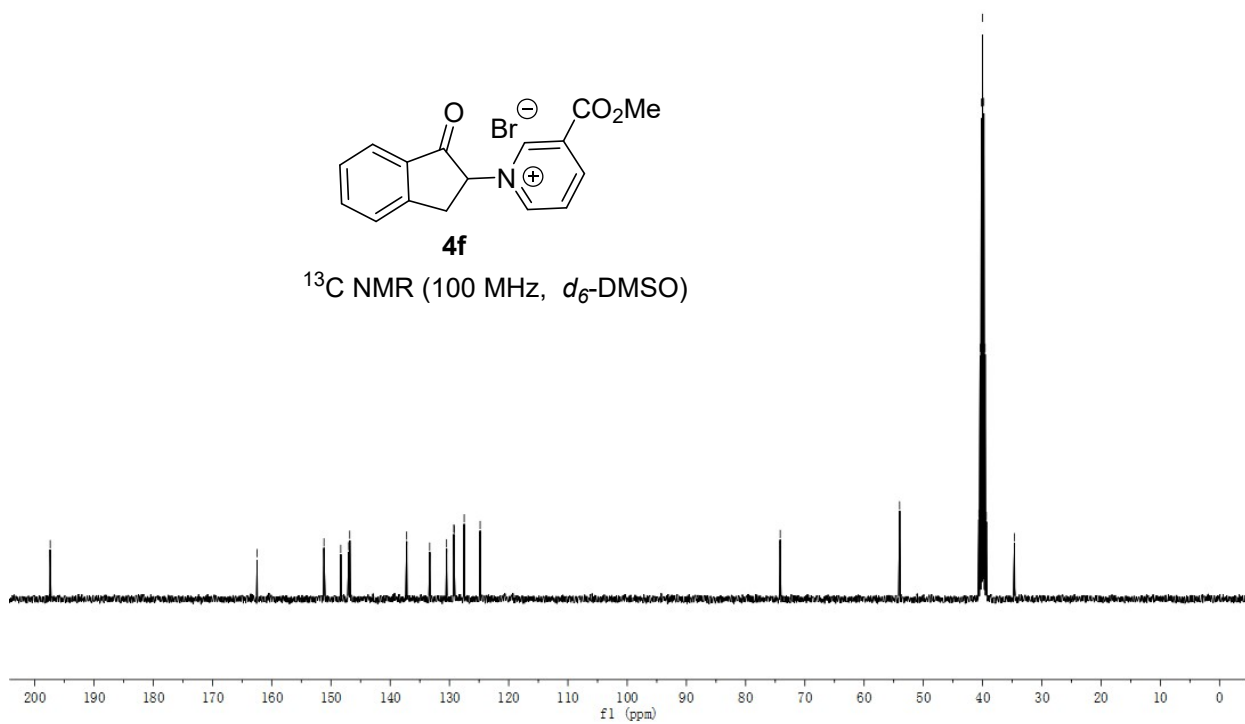

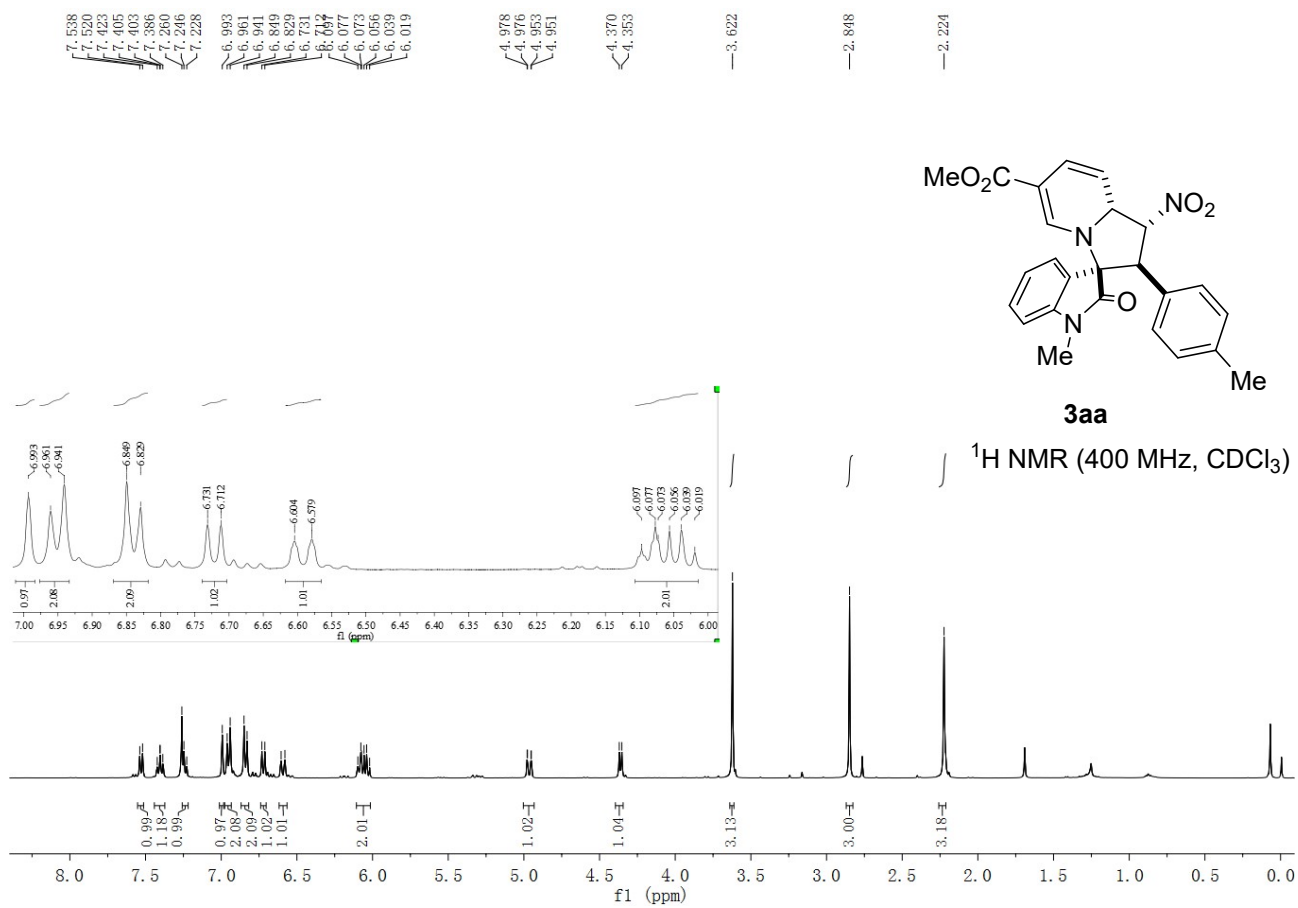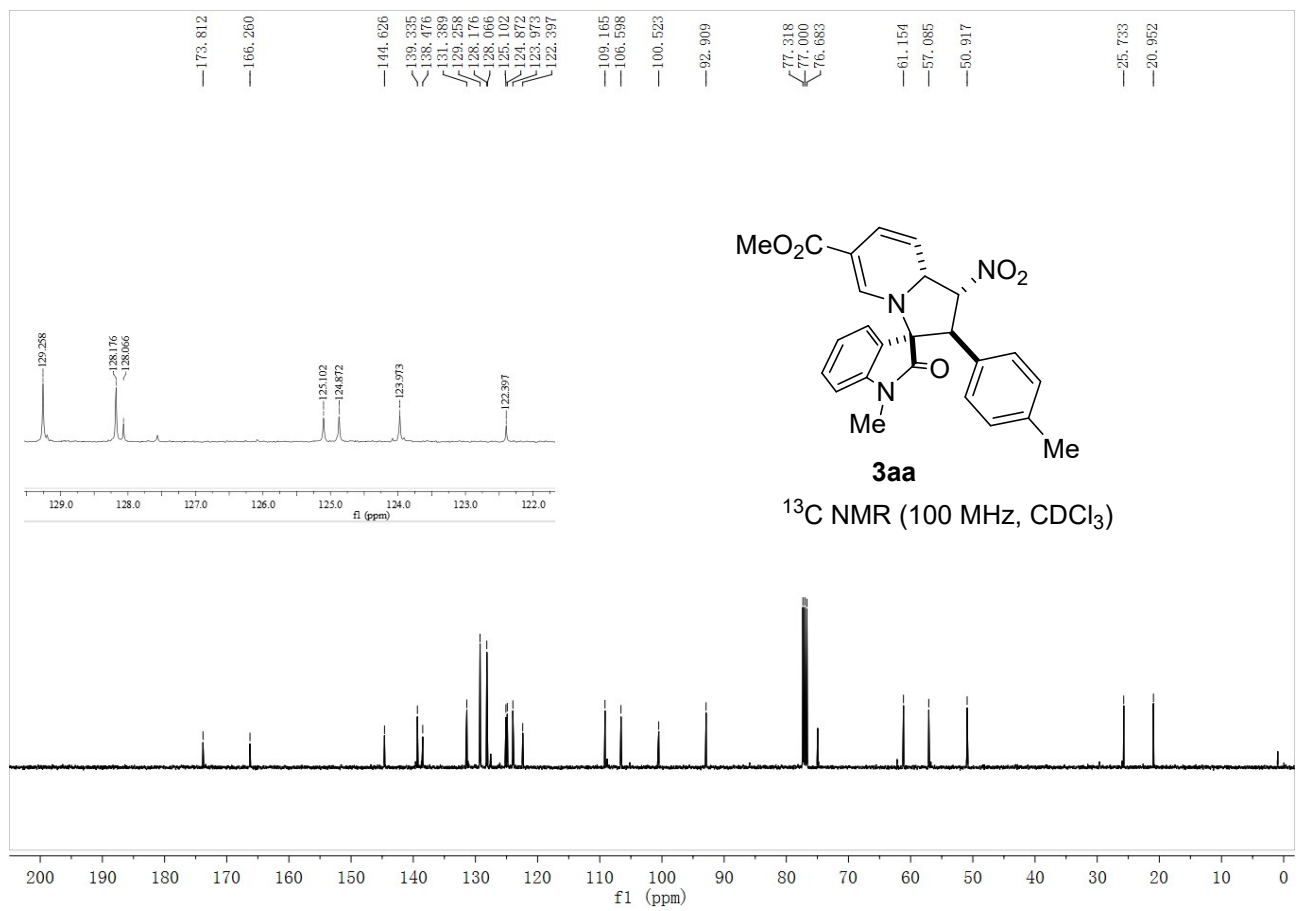

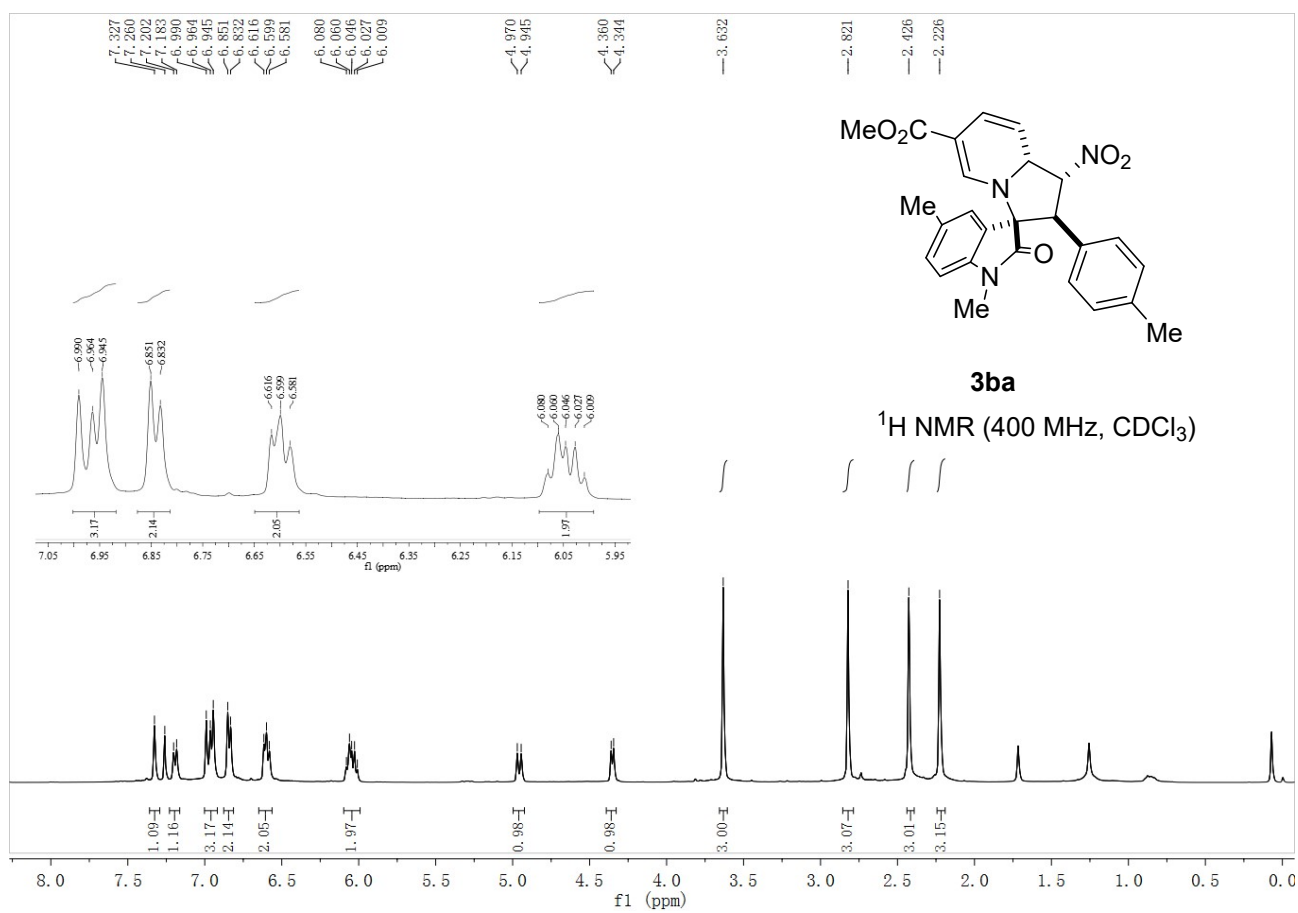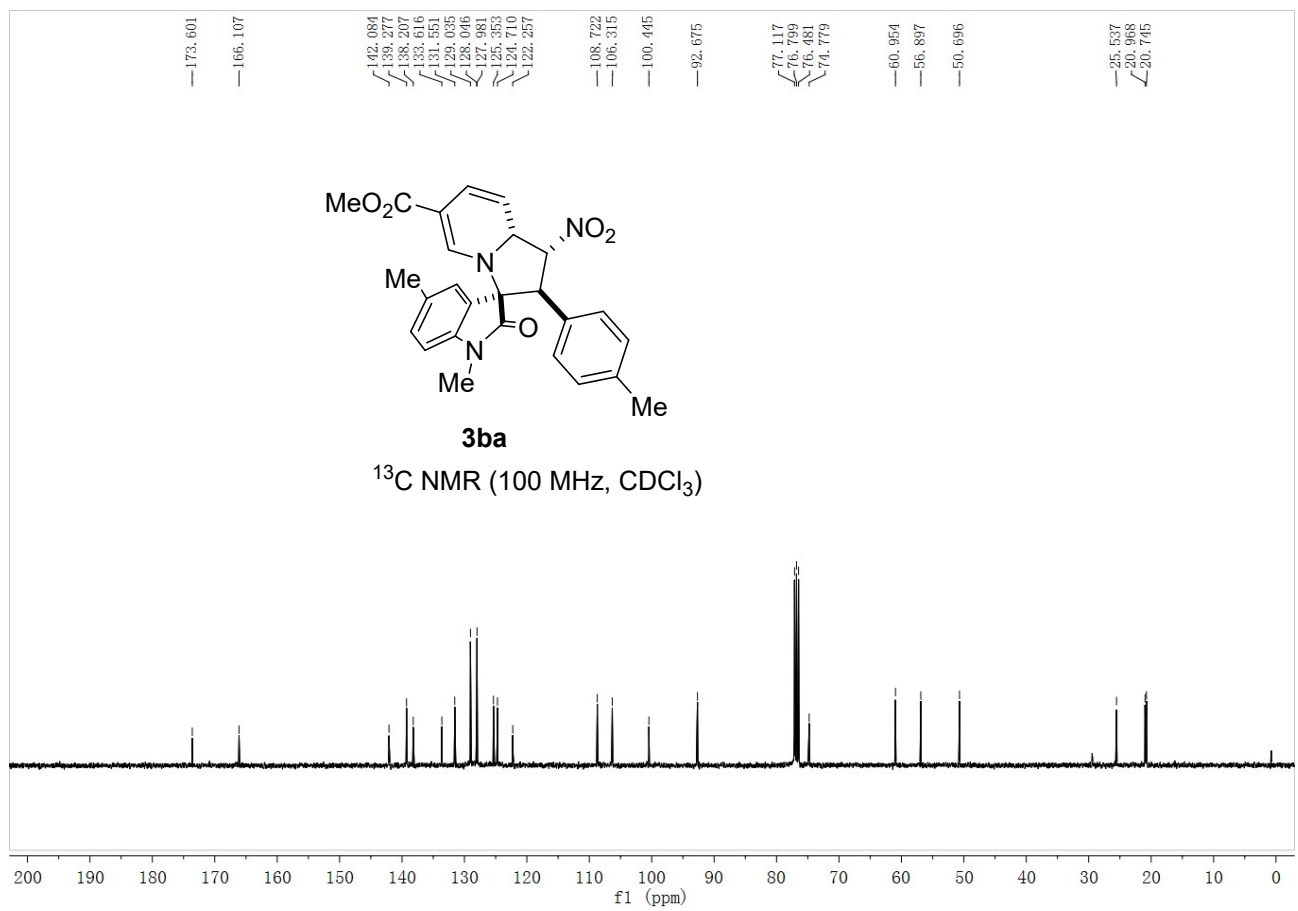

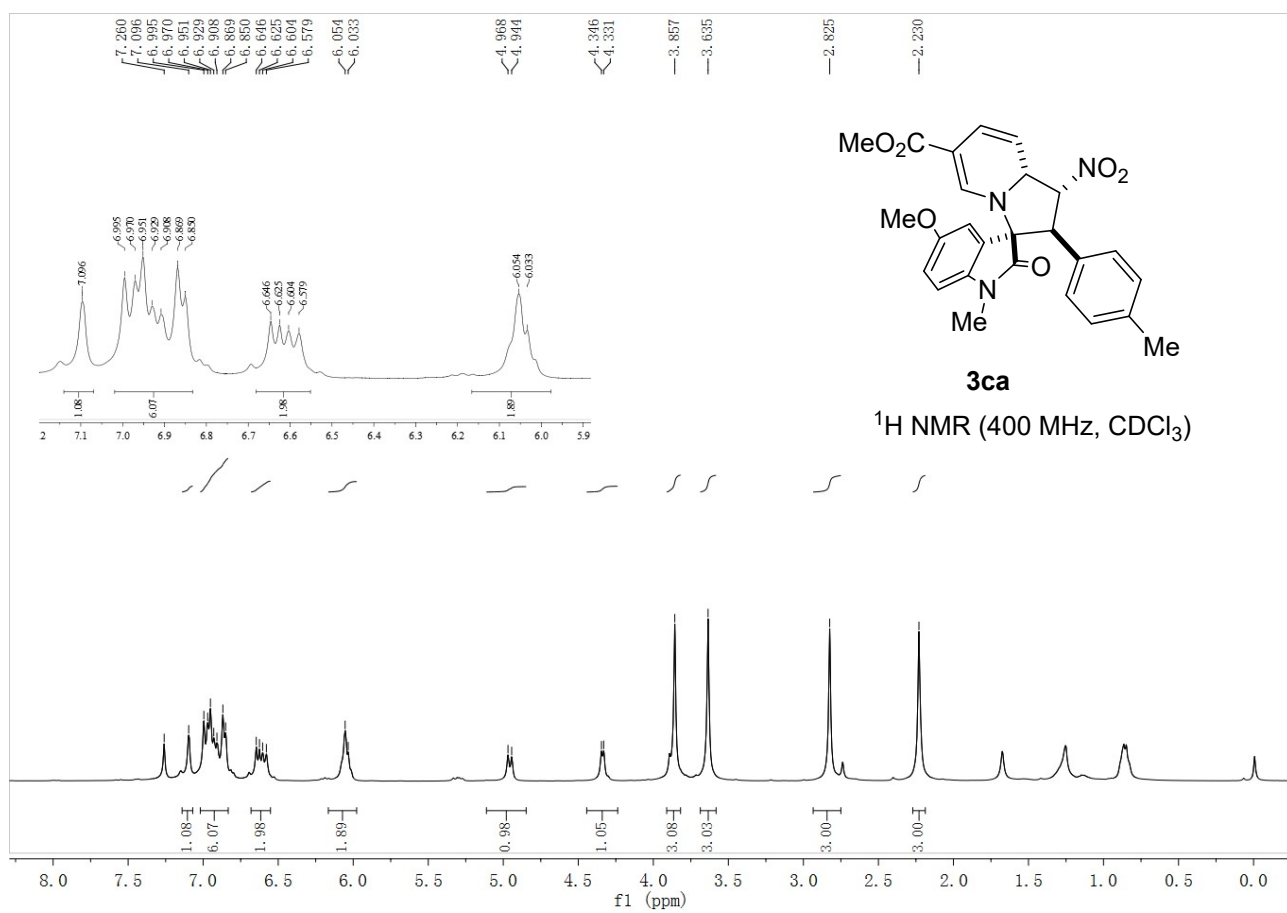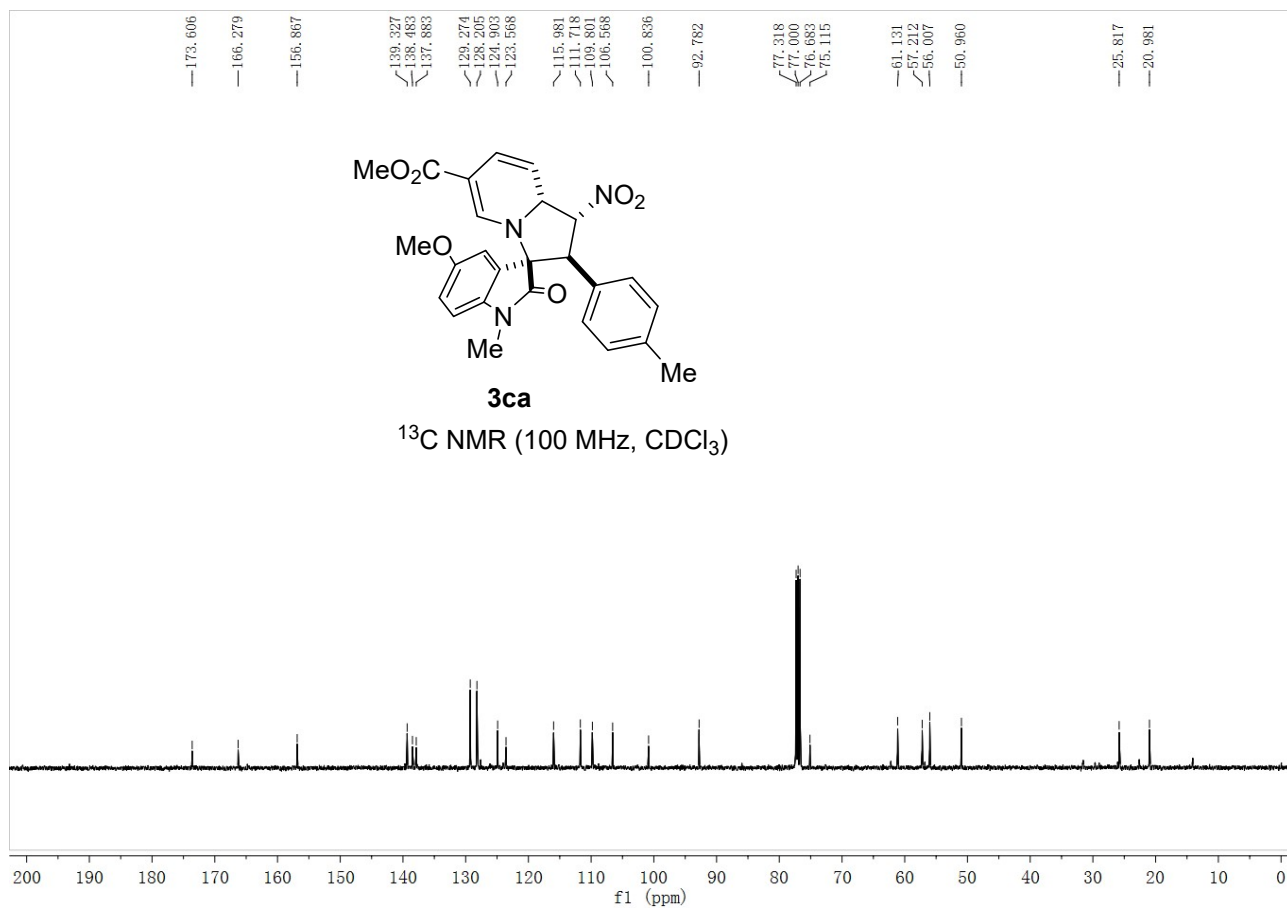





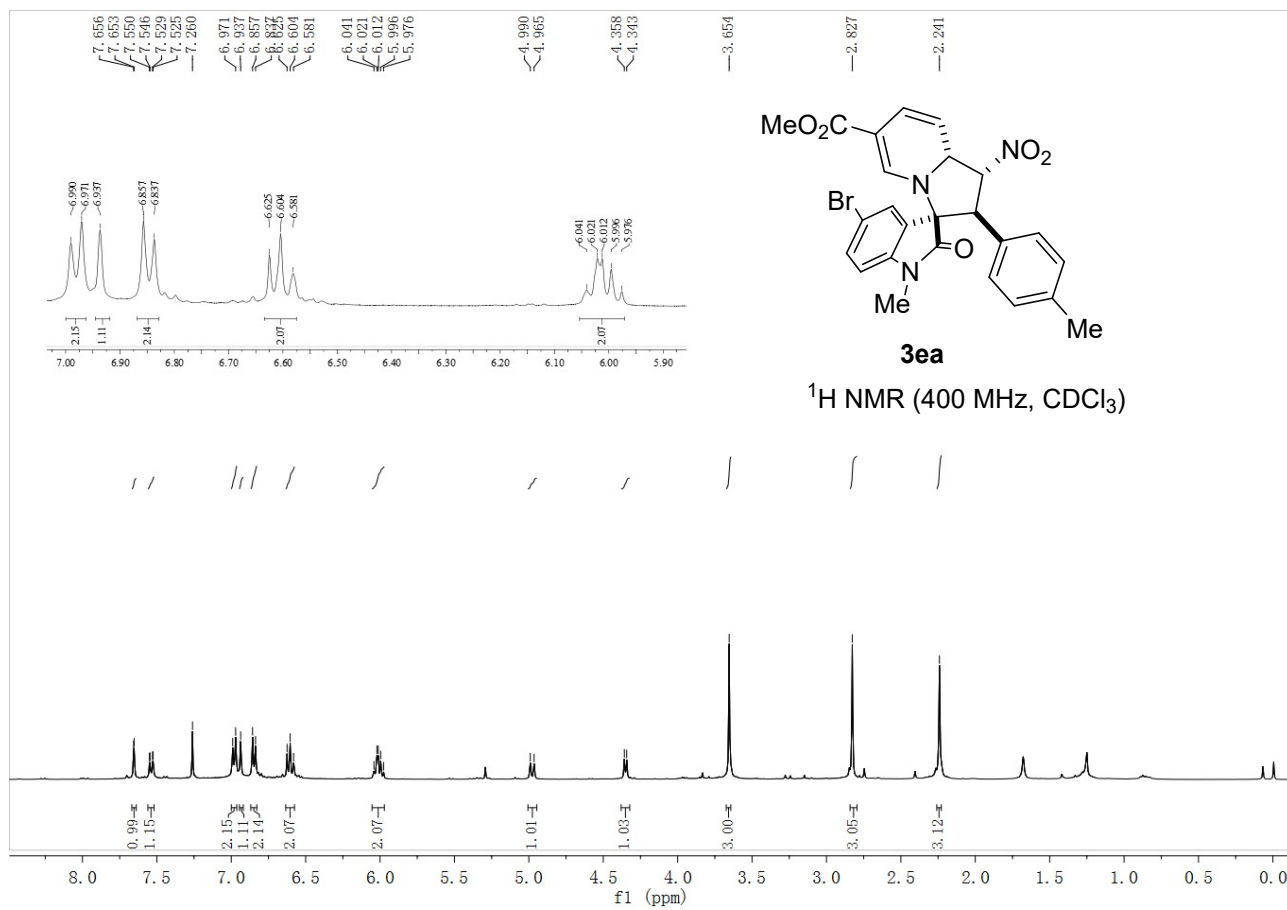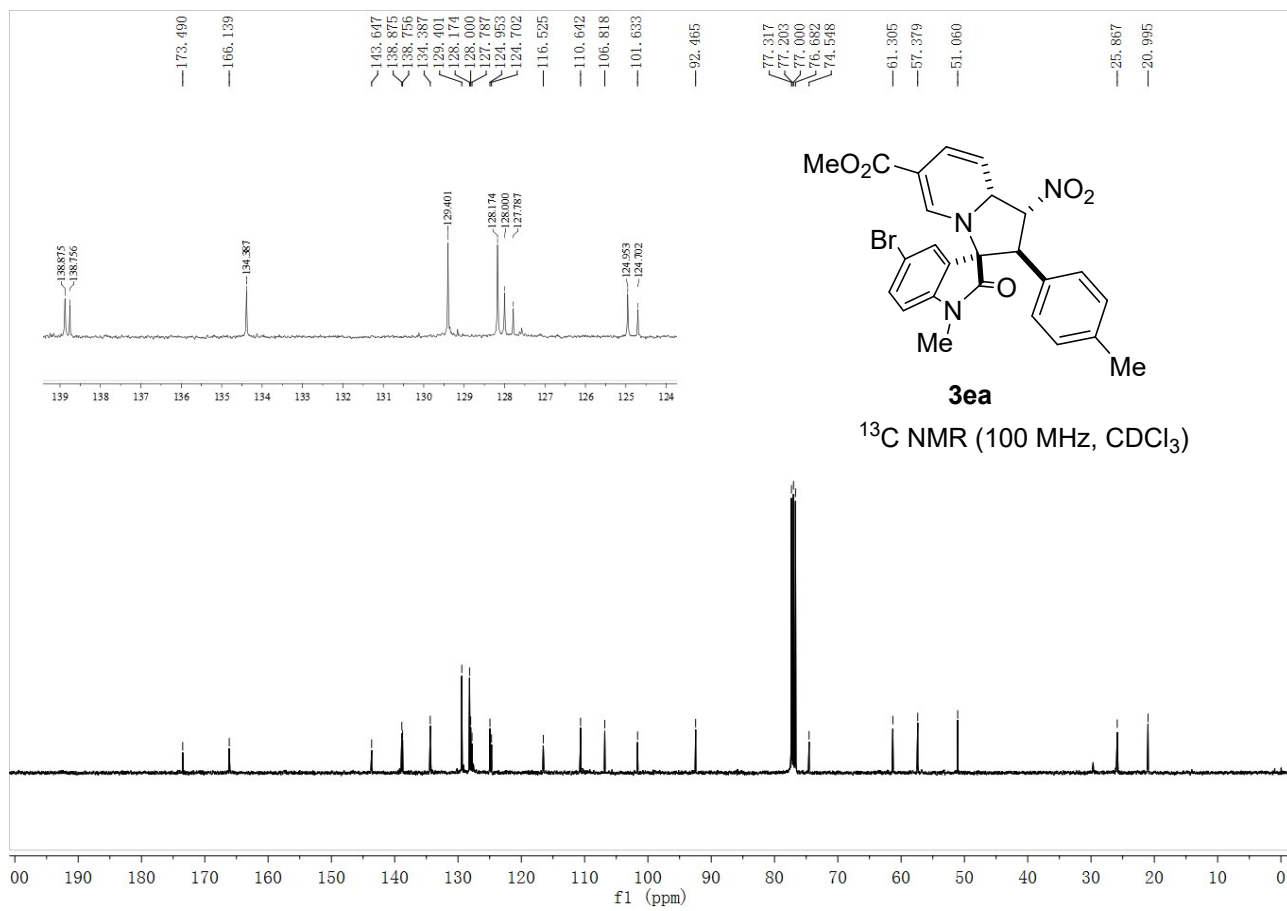

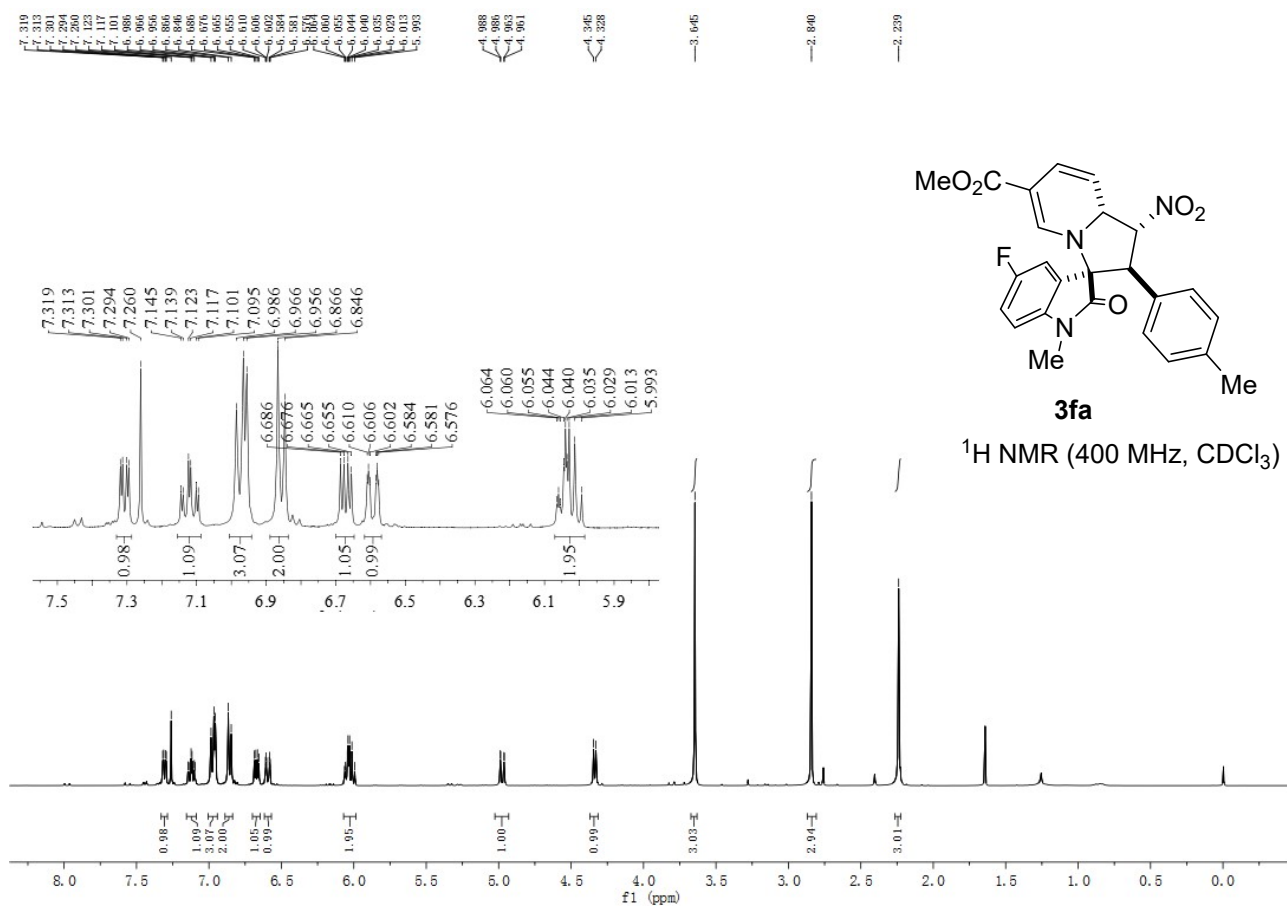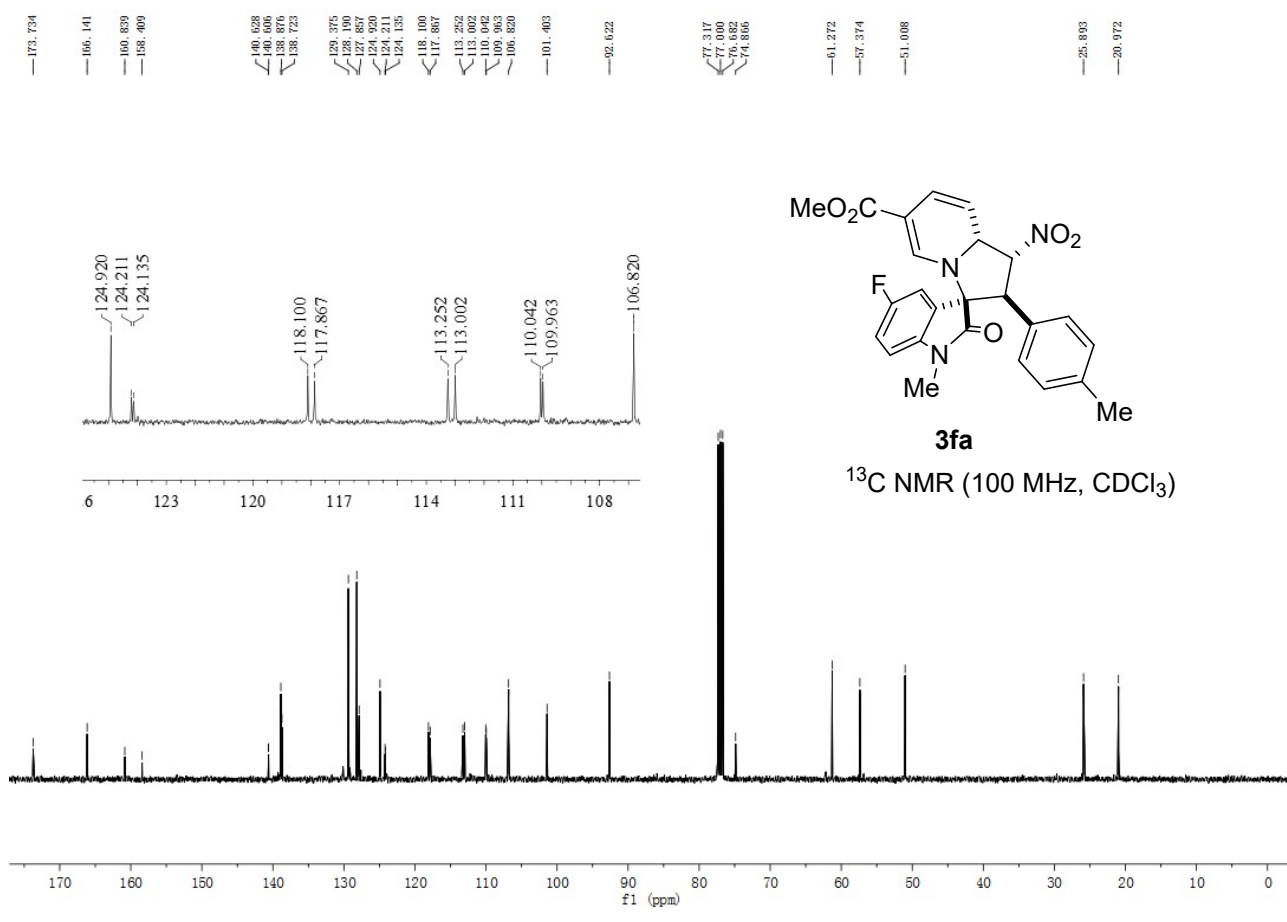

117.068  
117.067  
117.100  
117.129  
117.140

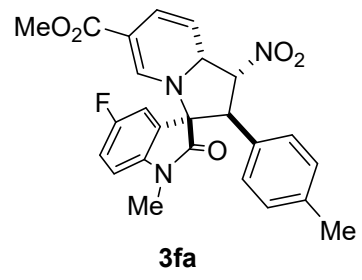

**3fa**  
<sup>19</sup>F NMR (376 MHz, CDCl<sub>3</sub>)

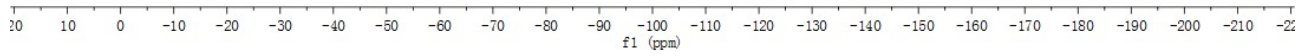

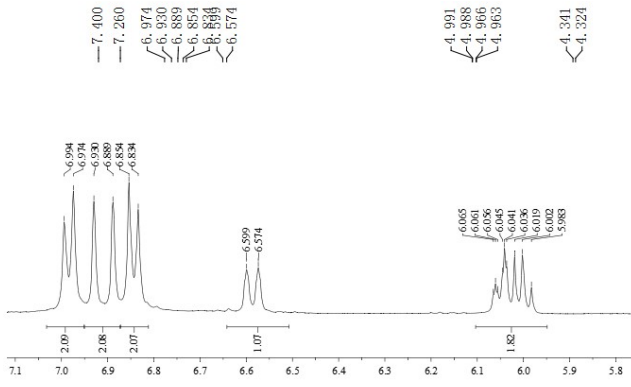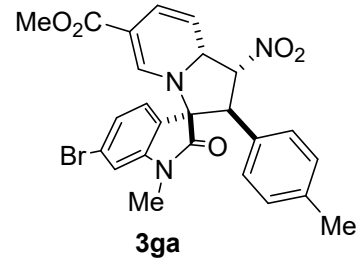

**<sup>1</sup>H NMR (400 MHz, CDCl<sub>3</sub>)**

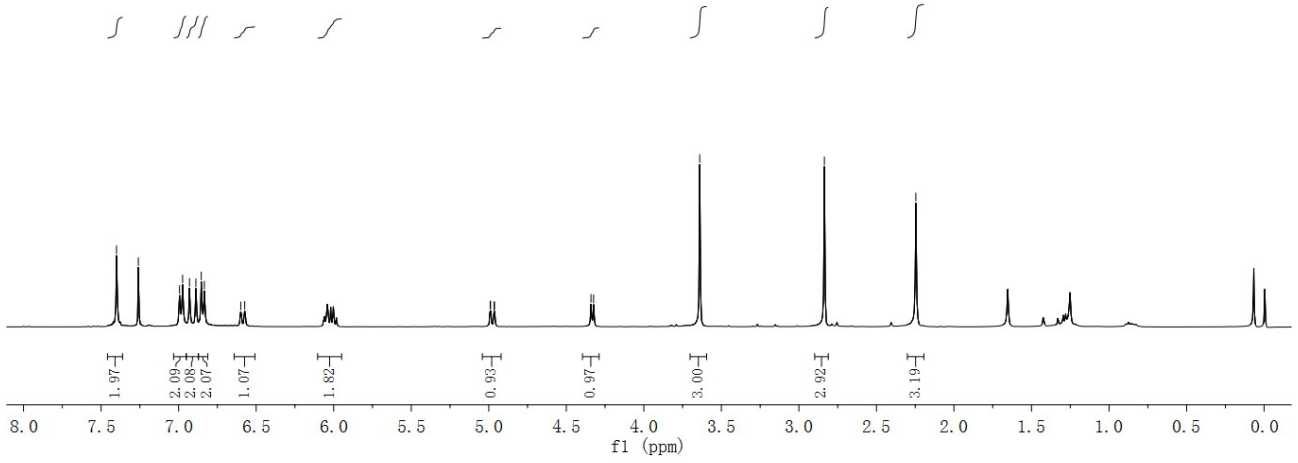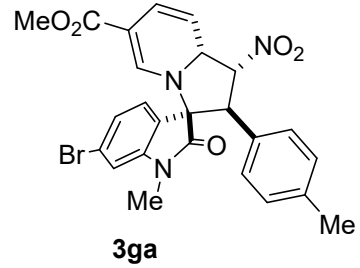

**<sup>13</sup>C NMR (100 MHz, CDCl<sub>3</sub>)**

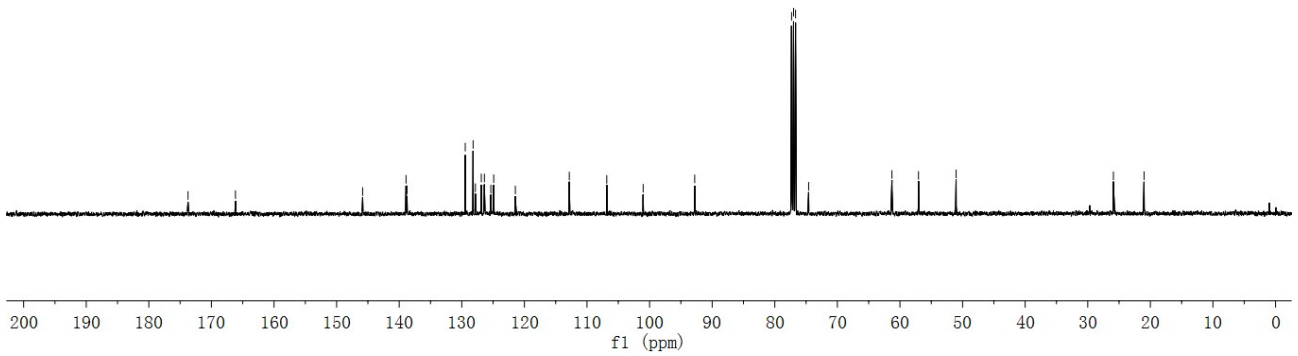

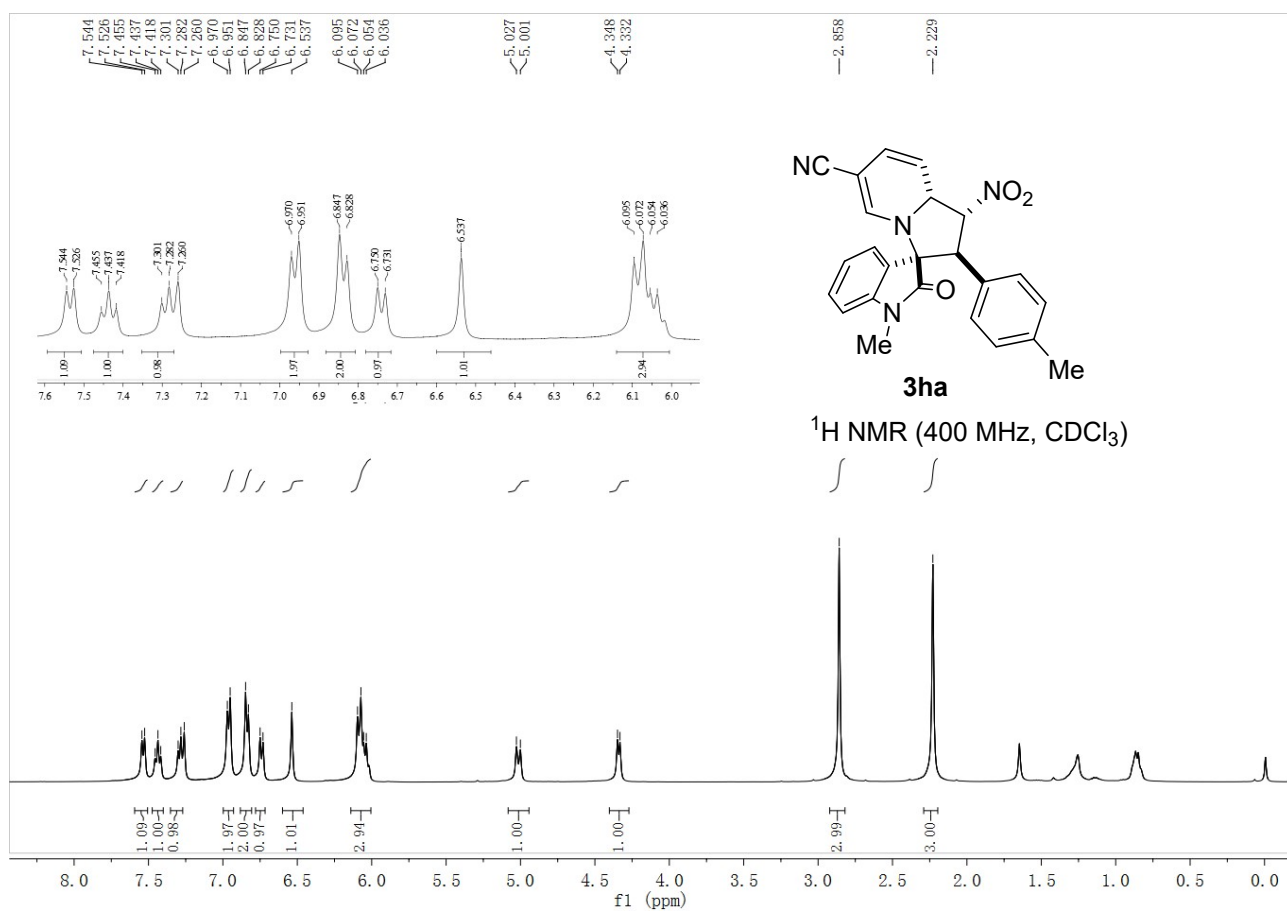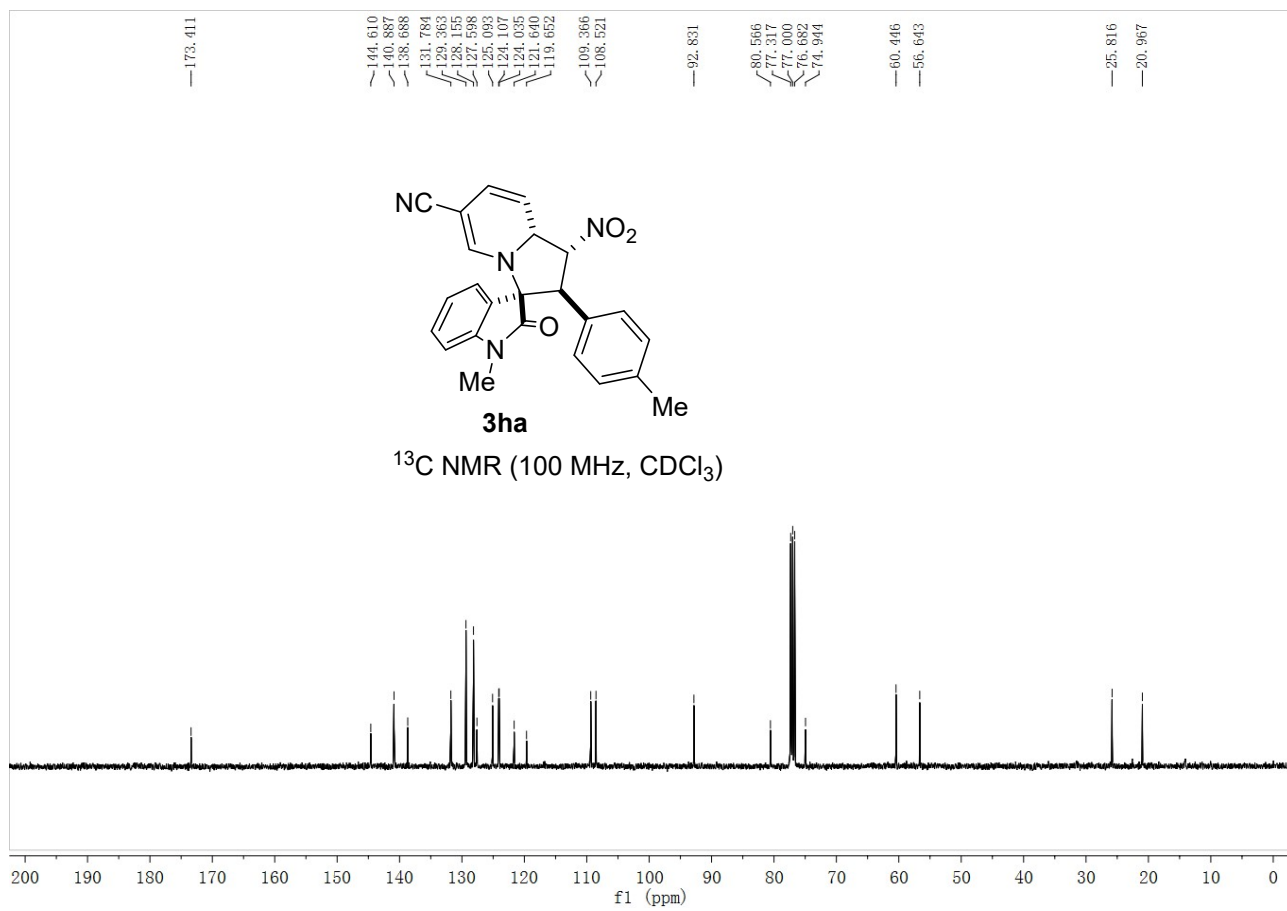

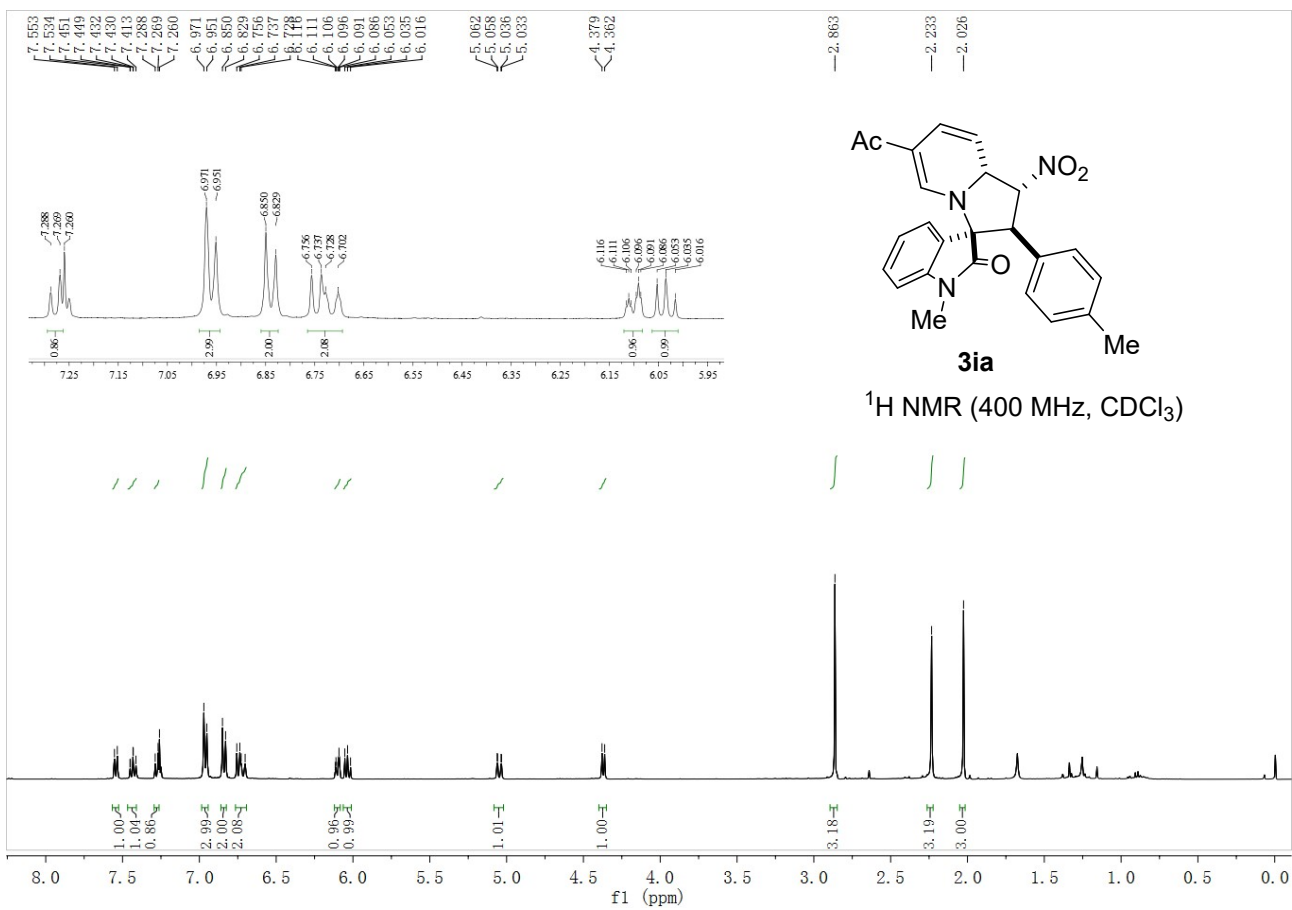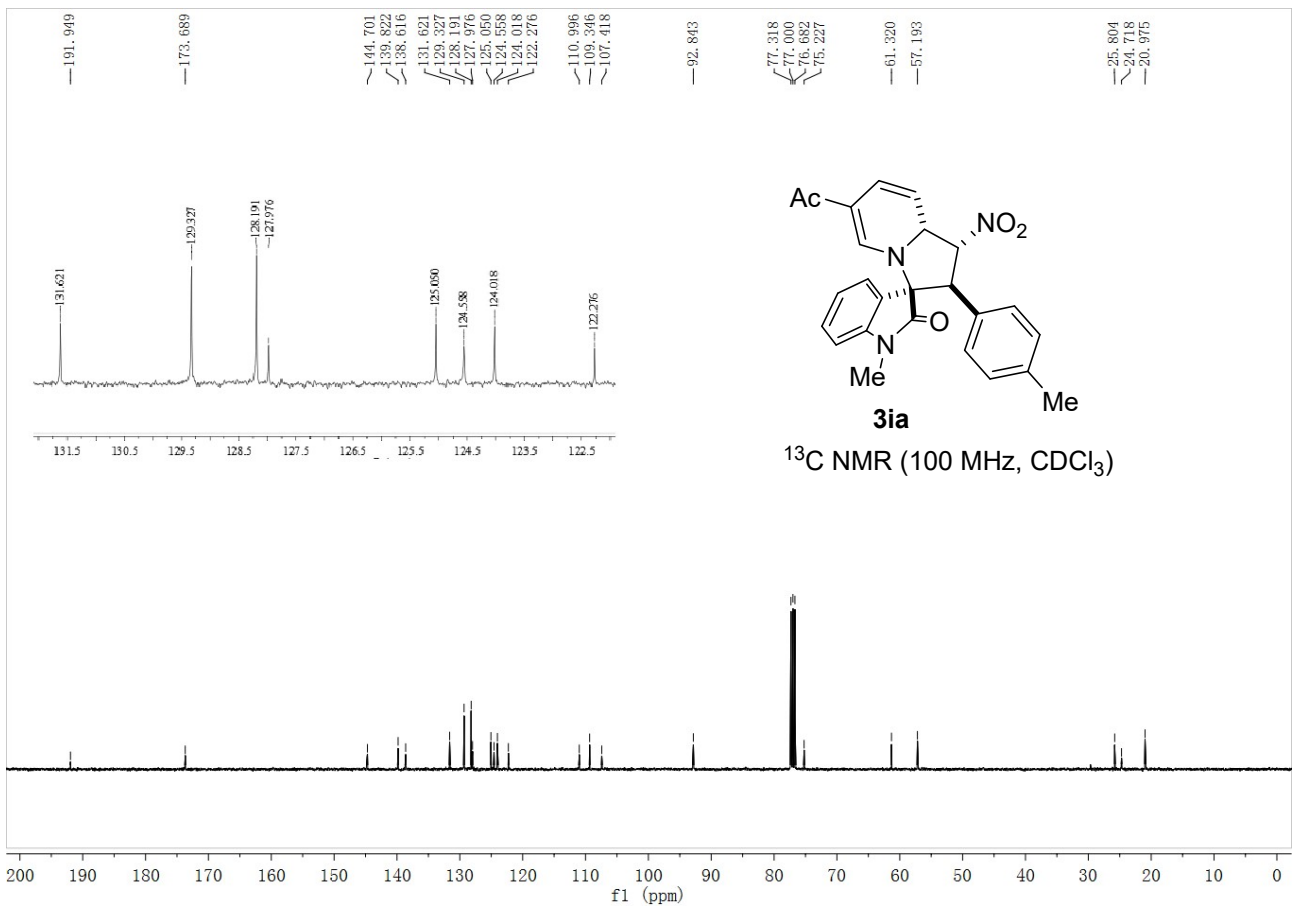

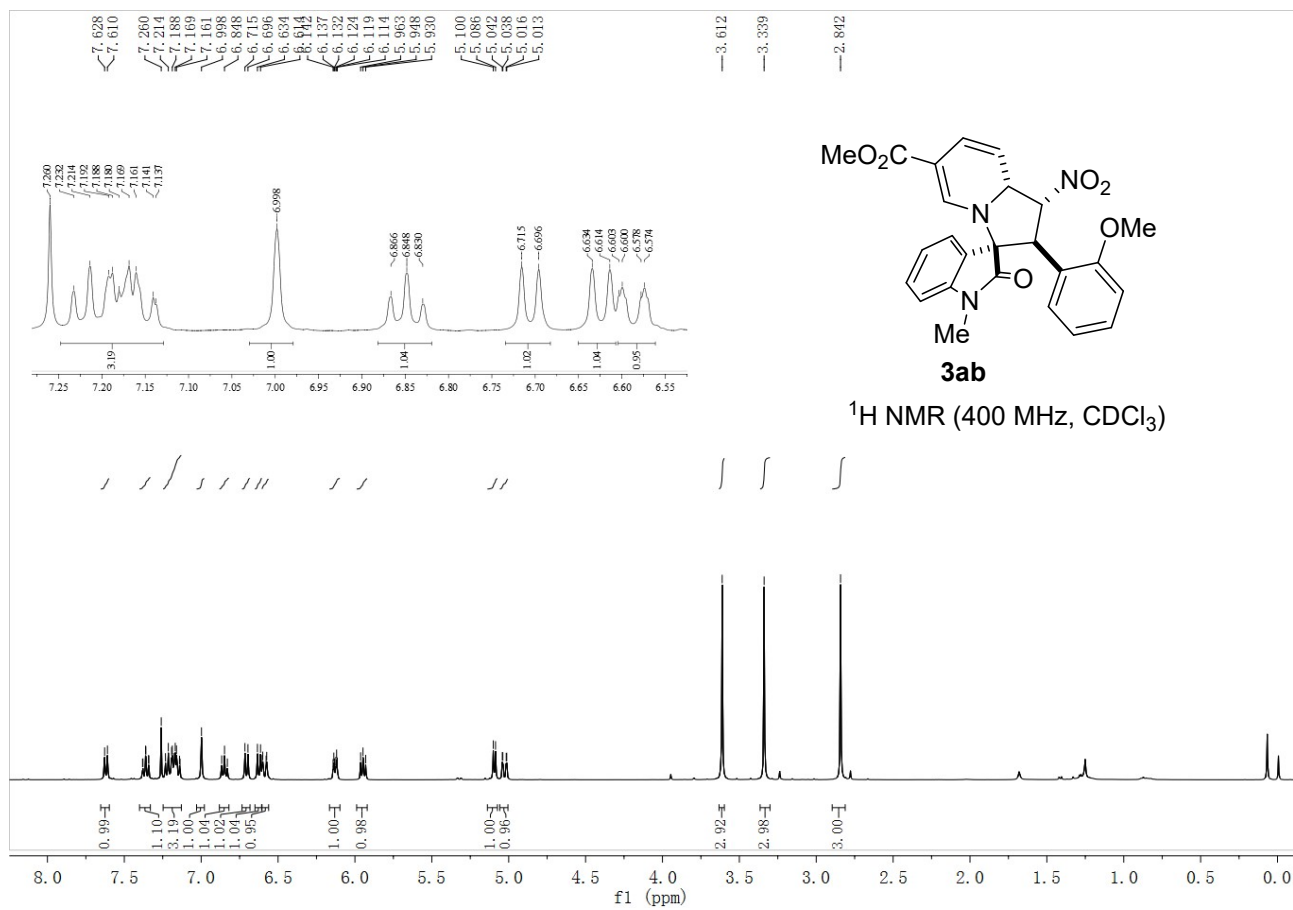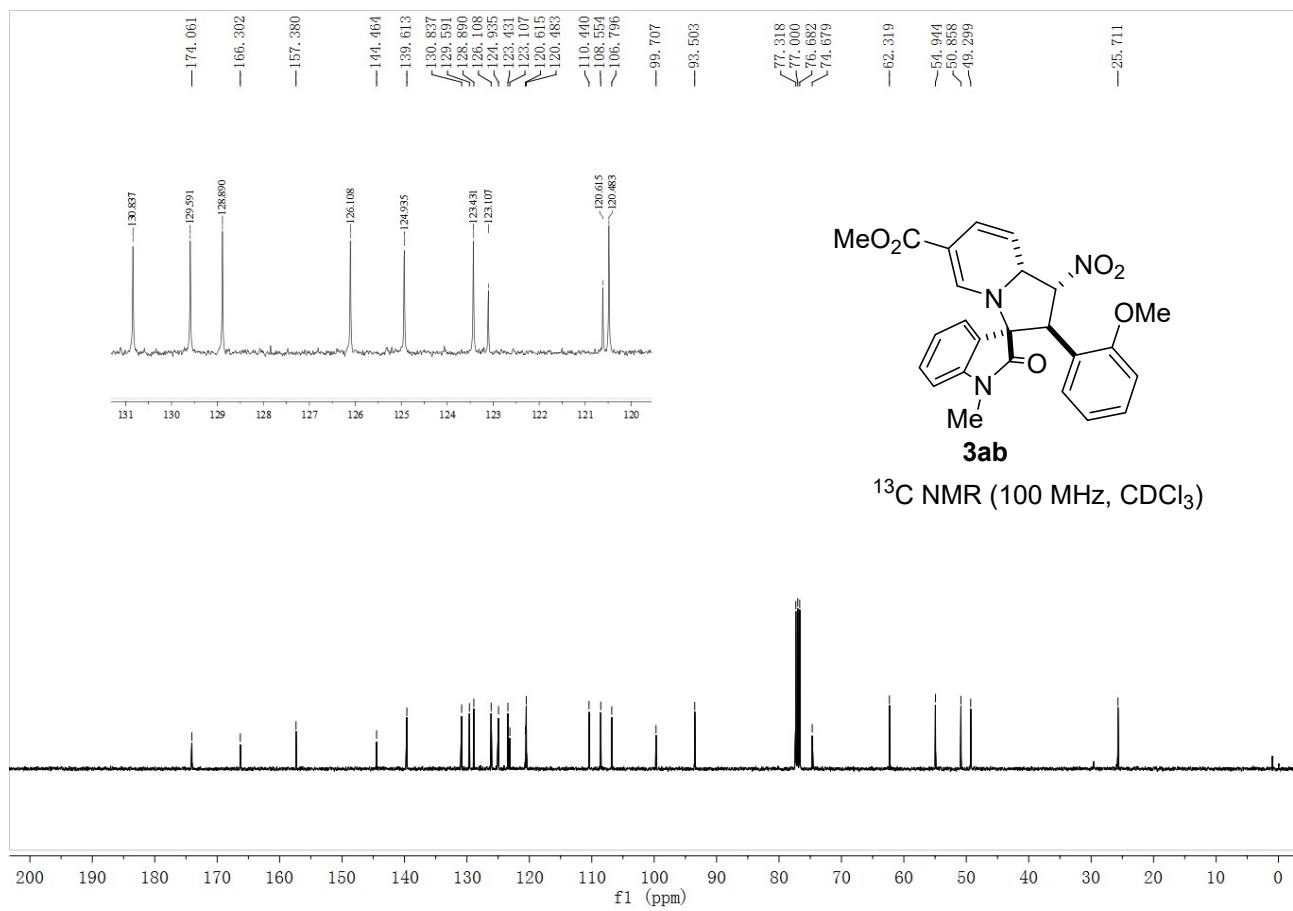



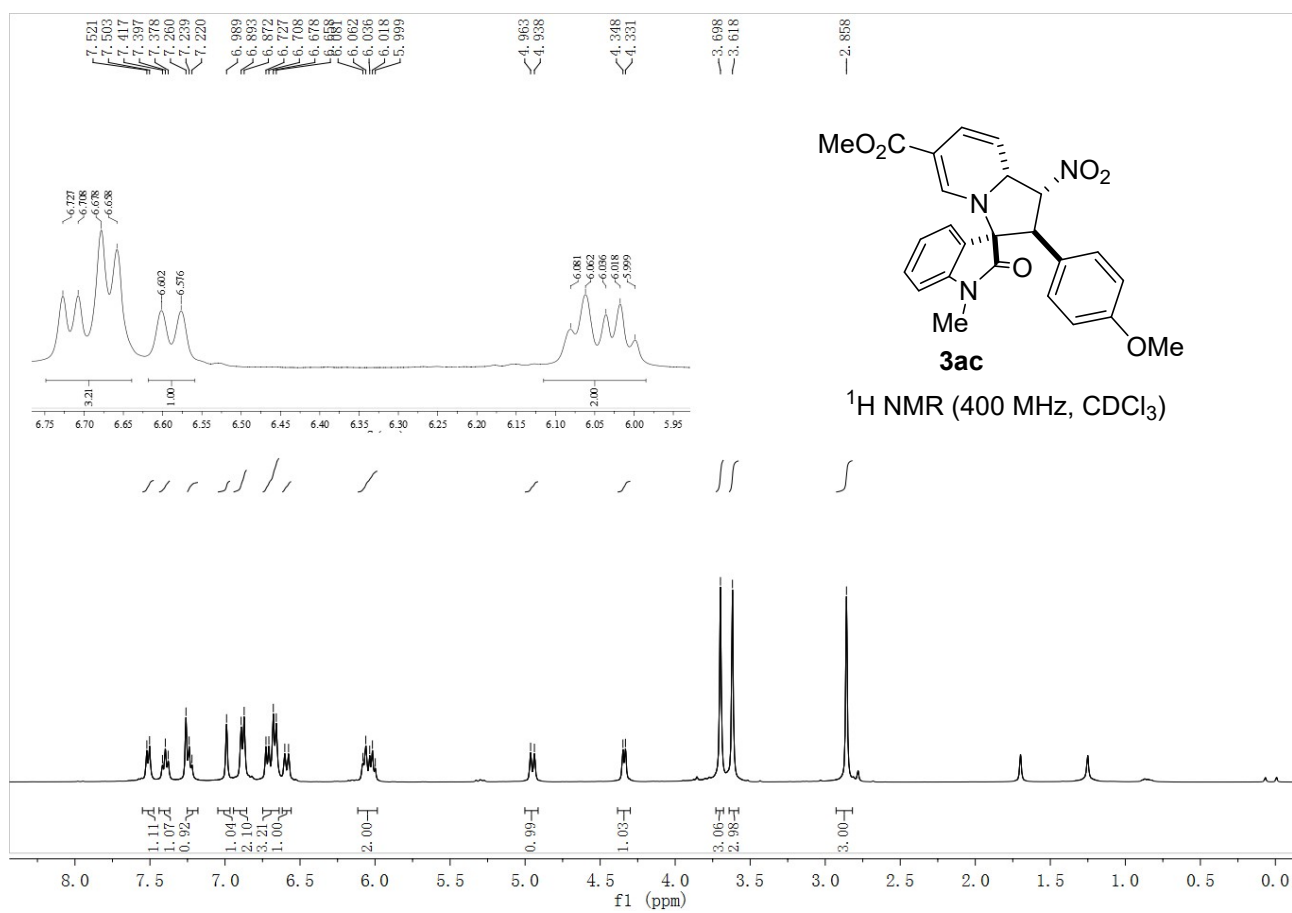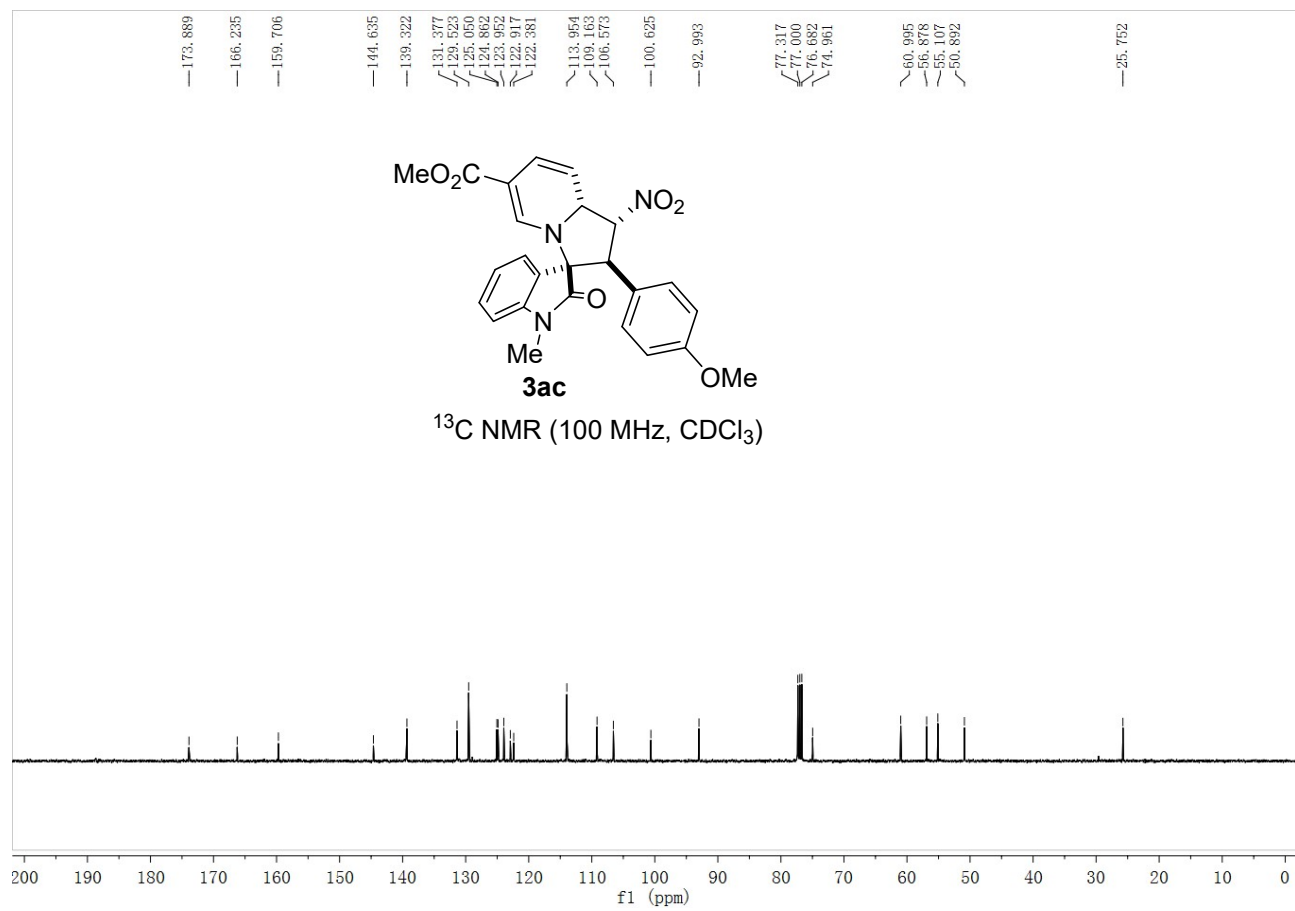

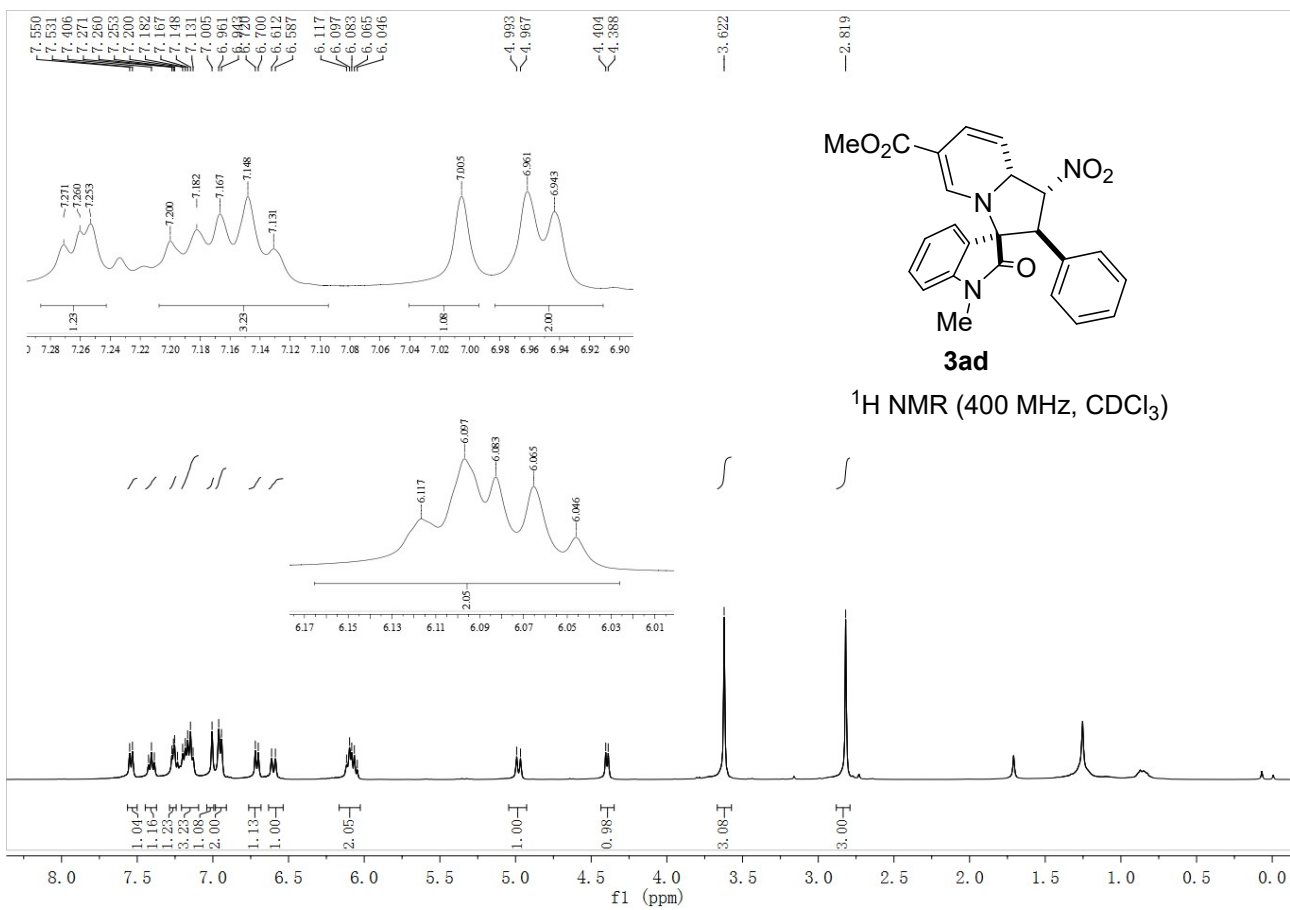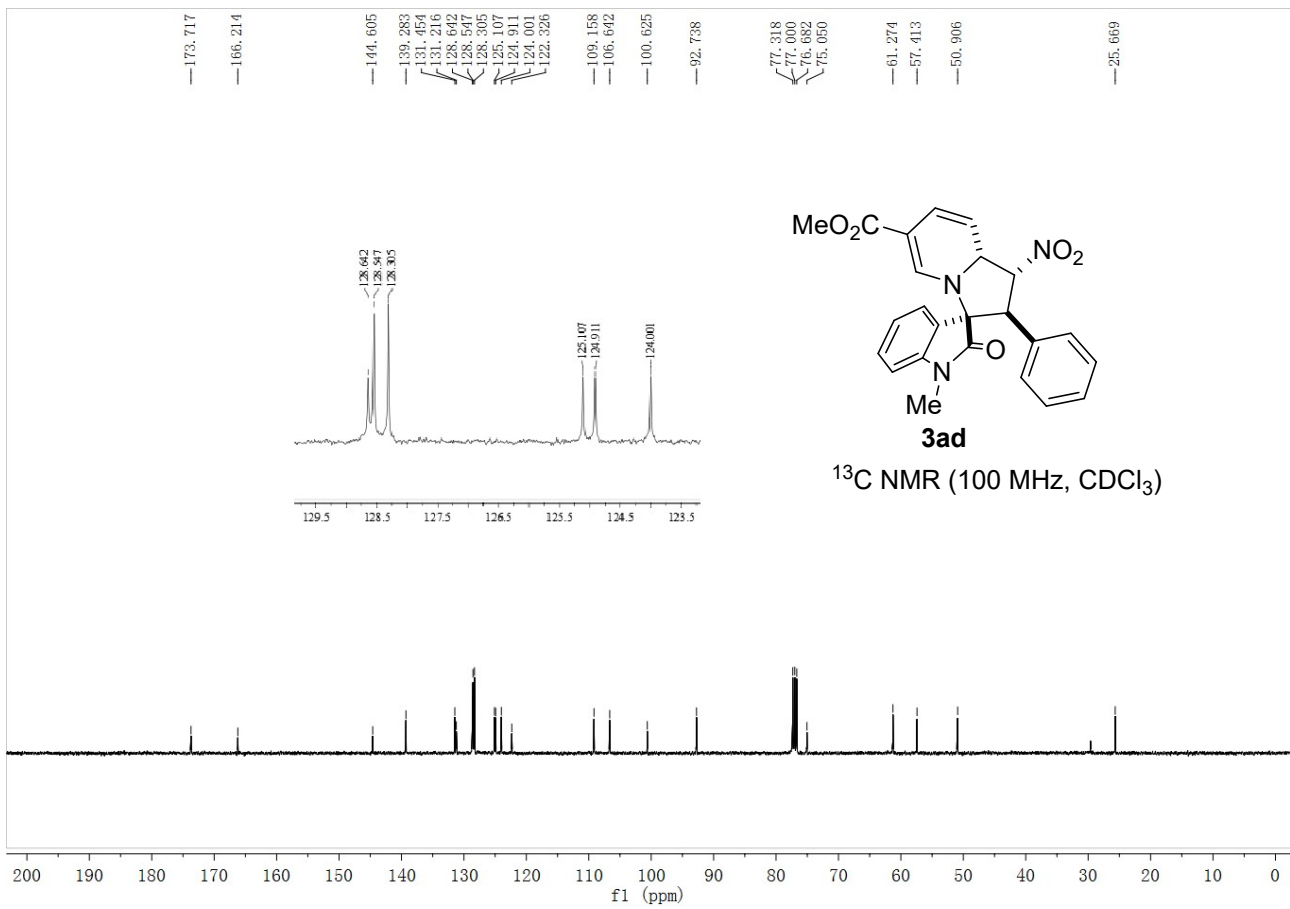

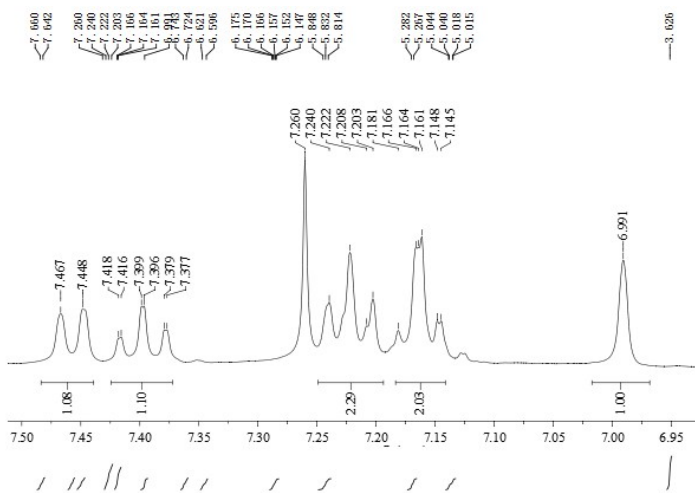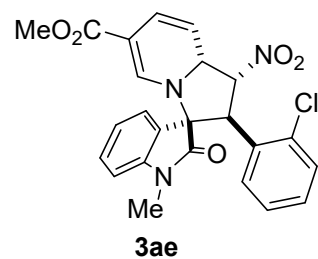

<sup>1</sup>H NMR (400 MHz, CDCl<sub>3</sub>)

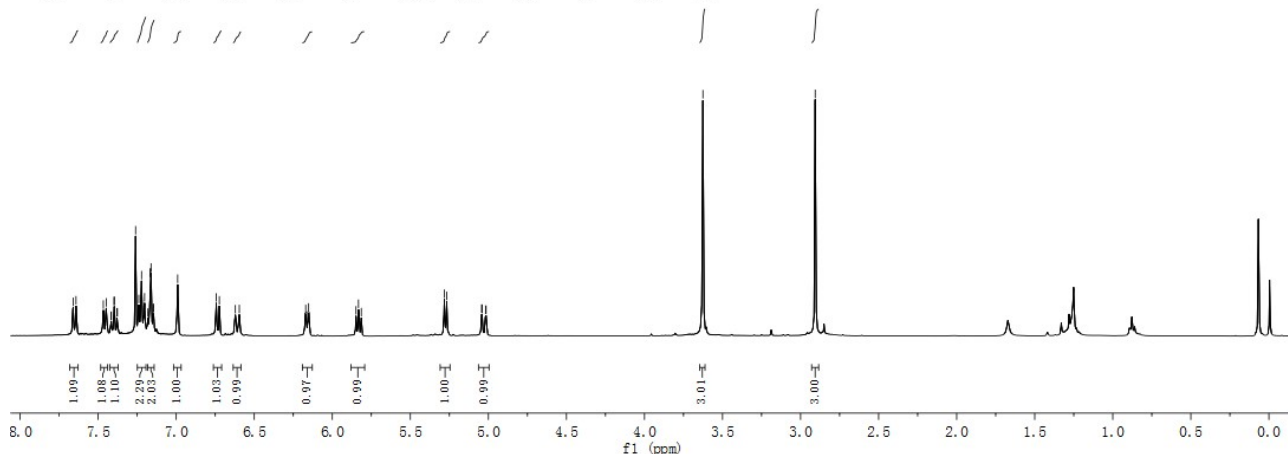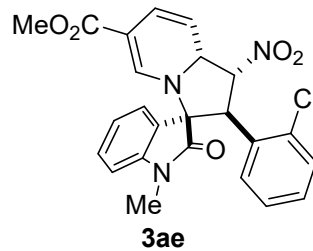

<sup>13</sup>C NMR (100 MHz, CDCl<sub>3</sub>)

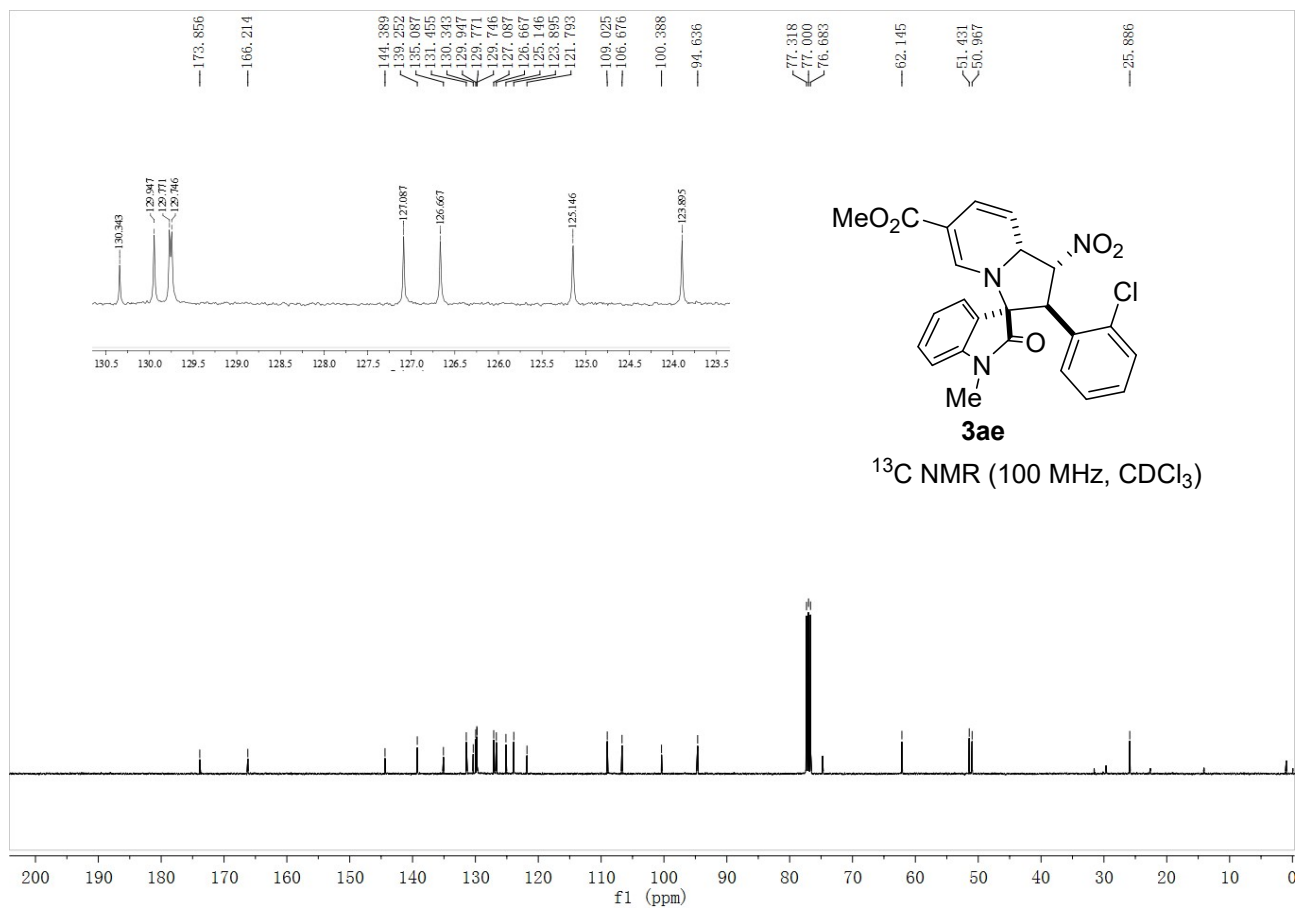

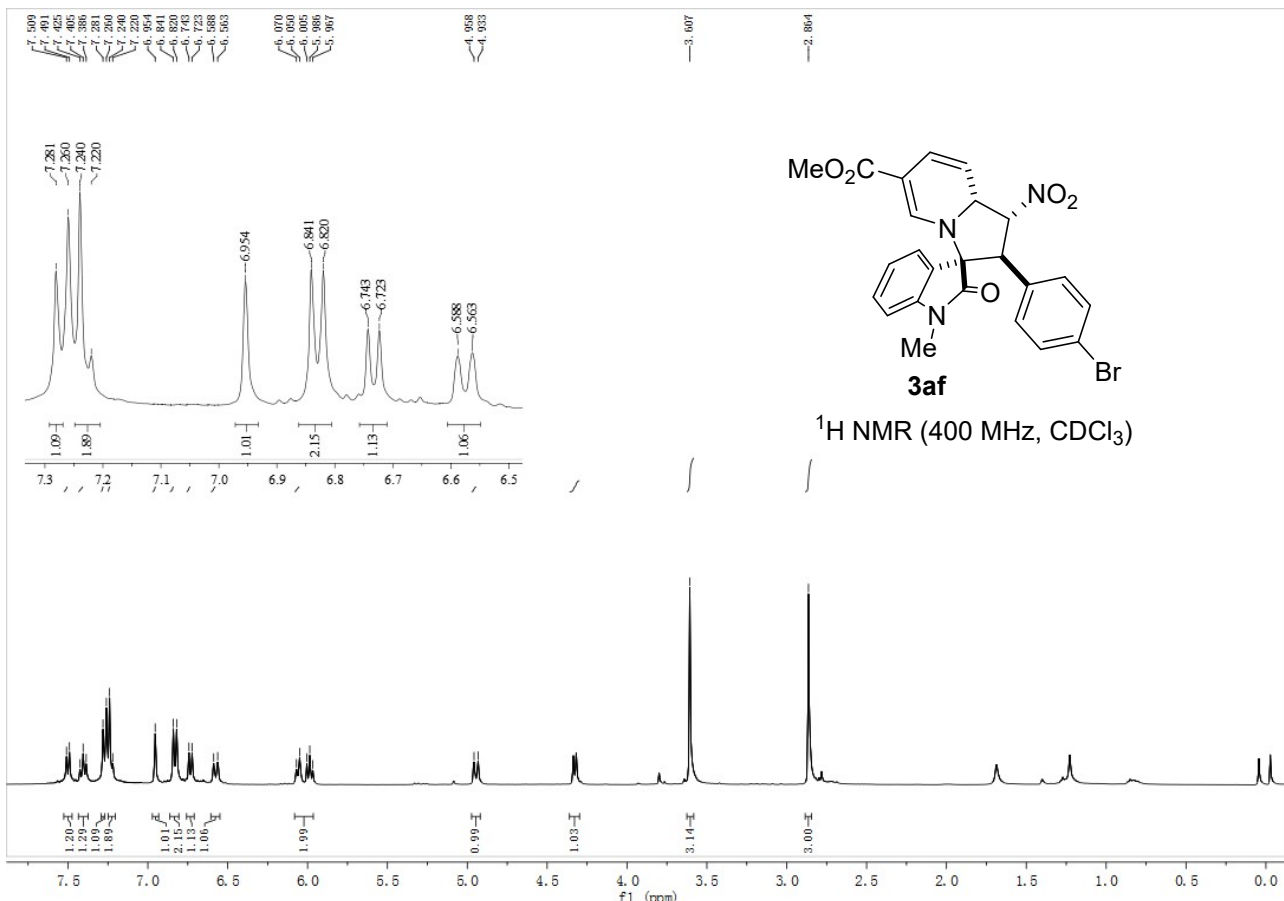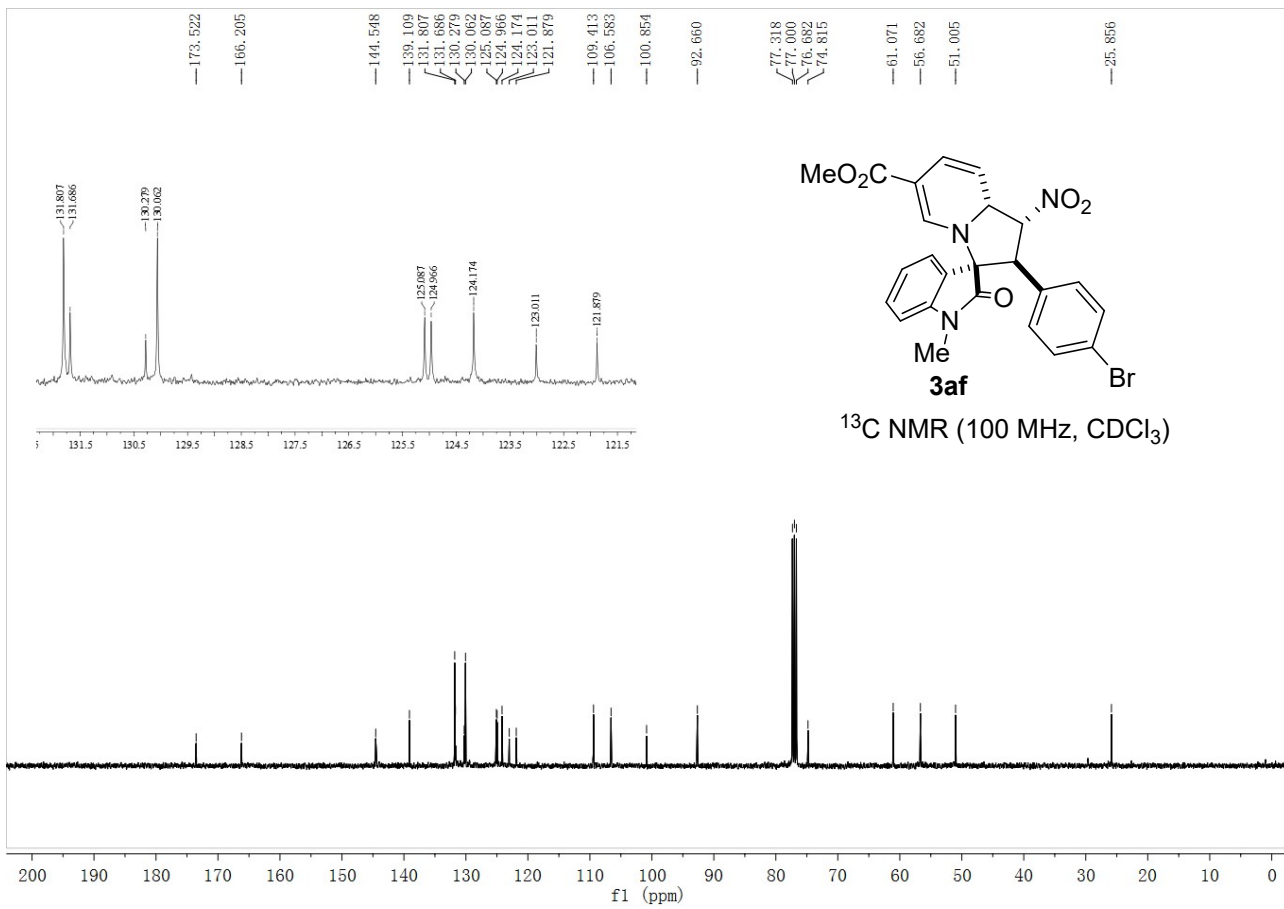

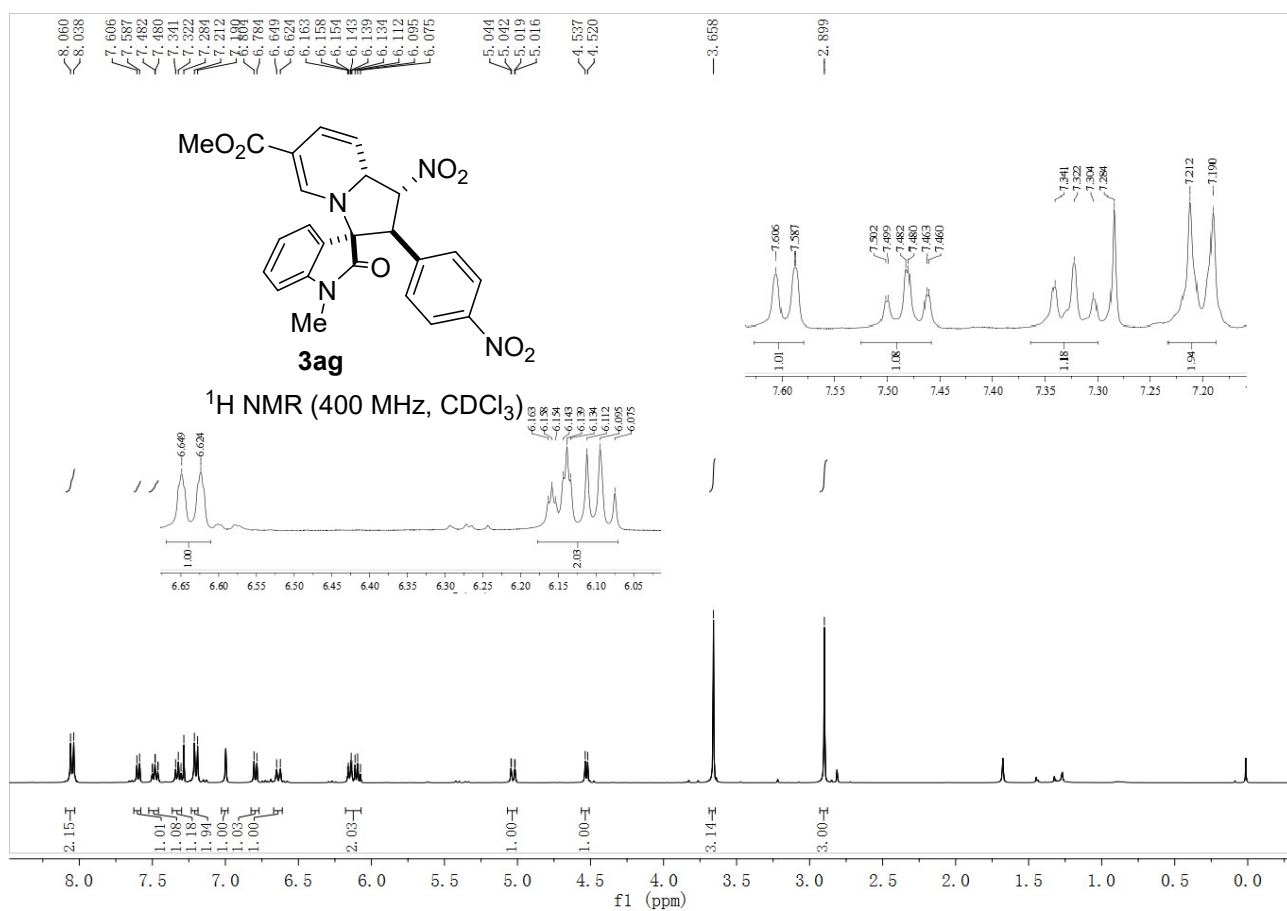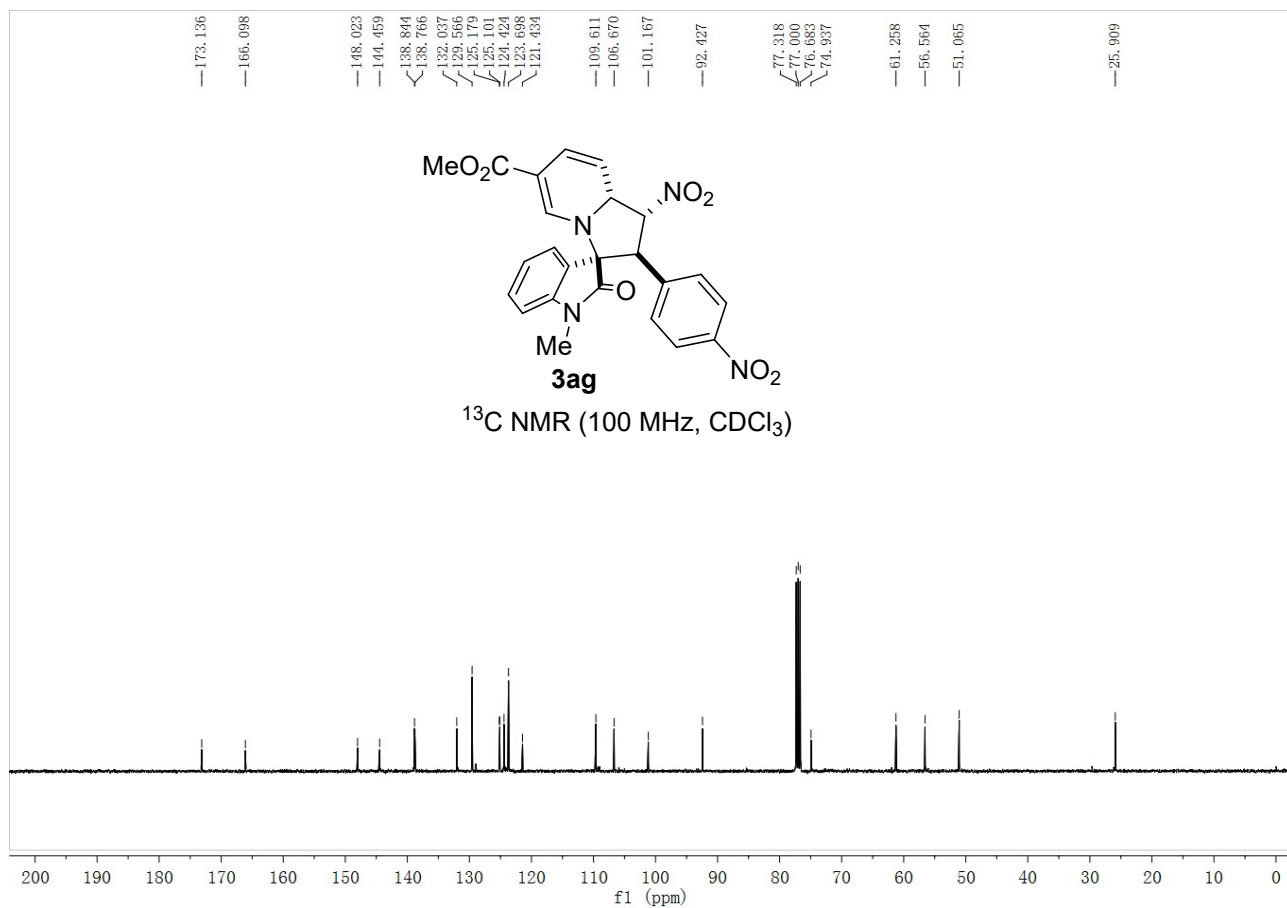

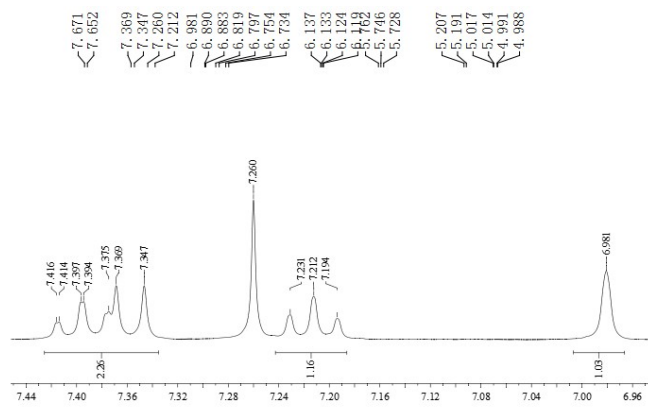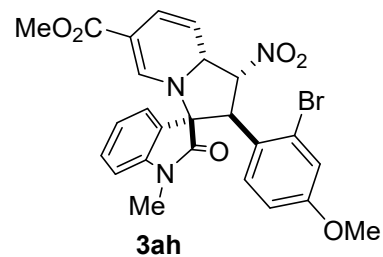

$^1\text{H}$  NMR (400 MHz,  $\text{CDCl}_3$ )

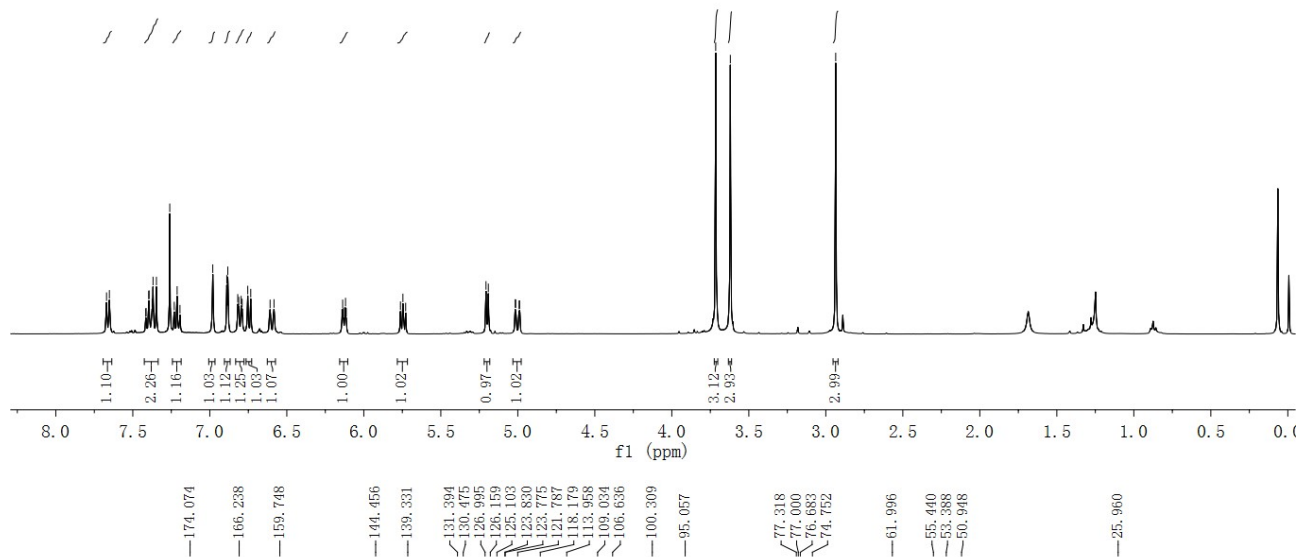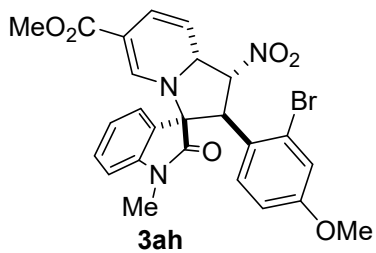

$^{13}\text{C}$  NMR (100 MHz,  $\text{CDCl}_3$ )

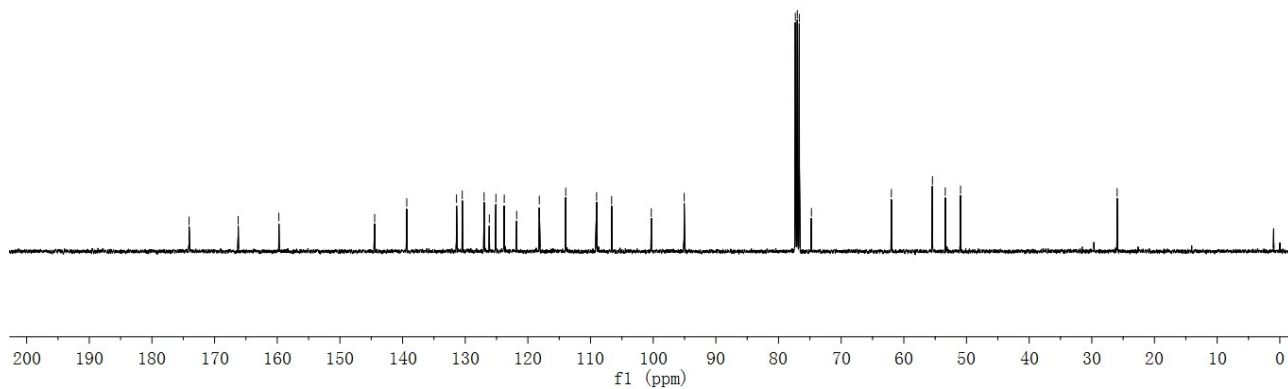

7.528  
7.510  
7.289  
7.181  
7.168  
7.160  
7.156  
6.735  
6.584  
6.571  
6.570  
6.576  
6.559  
6.553  
6.549  
6.544  
6.859  
6.842  
6.848  
6.283  
5.021  
5.017  
4.995  
4.991  
4.904  
3.607  
3.070  
1.735

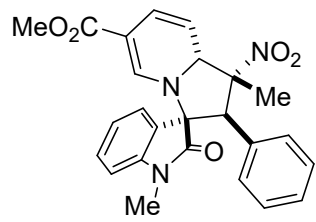

**3ai**

<sup>1</sup>H NMR (400 MHz, CDCl<sub>3</sub>)

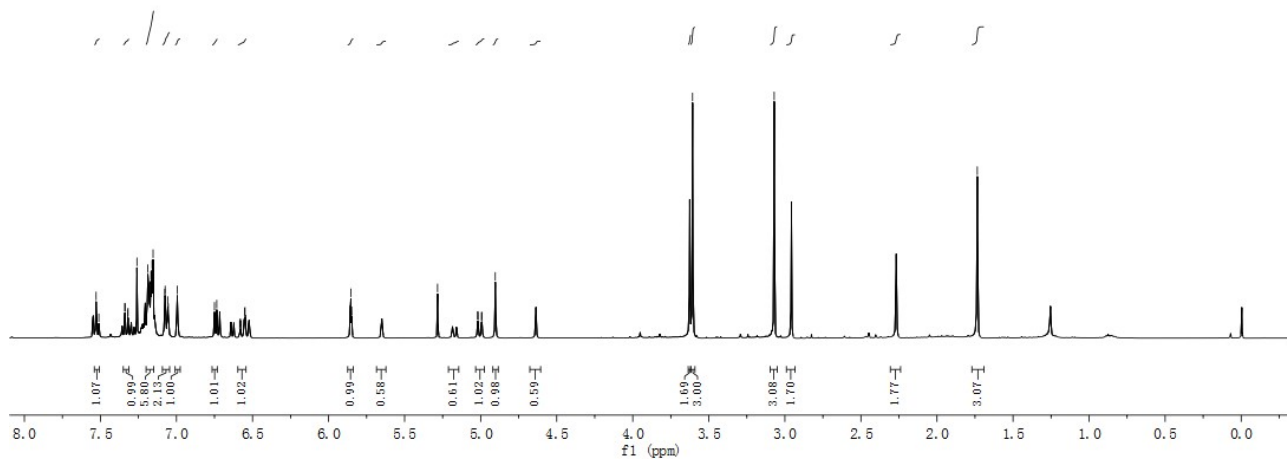

174.847  
171.341  
166.319  
166.044  
144.346  
141.130  
141.023  
131.258  
131.314  
131.071  
130.664  
130.585  
130.539  
128.509  
128.433  
125.069  
124.931  
124.800  
124.190  
122.881  
122.673  
107.976  
107.612  
101.942  
100.560  
99.307  
94.259  
77.318  
77.000  
76.682  
73.655  
69.258  
67.743  
63.924  
61.487  
50.925  
50.846  
25.455  
25.035  
21.276  
16.655

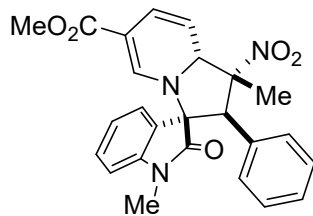

**3ai**

<sup>13</sup>C NMR (100 MHz, CDCl<sub>3</sub>)

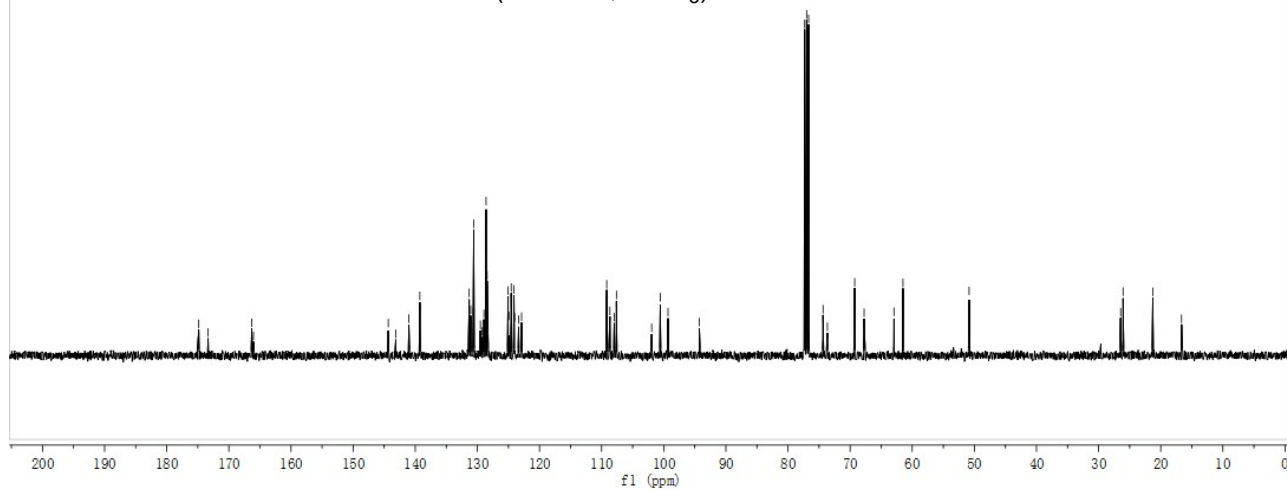

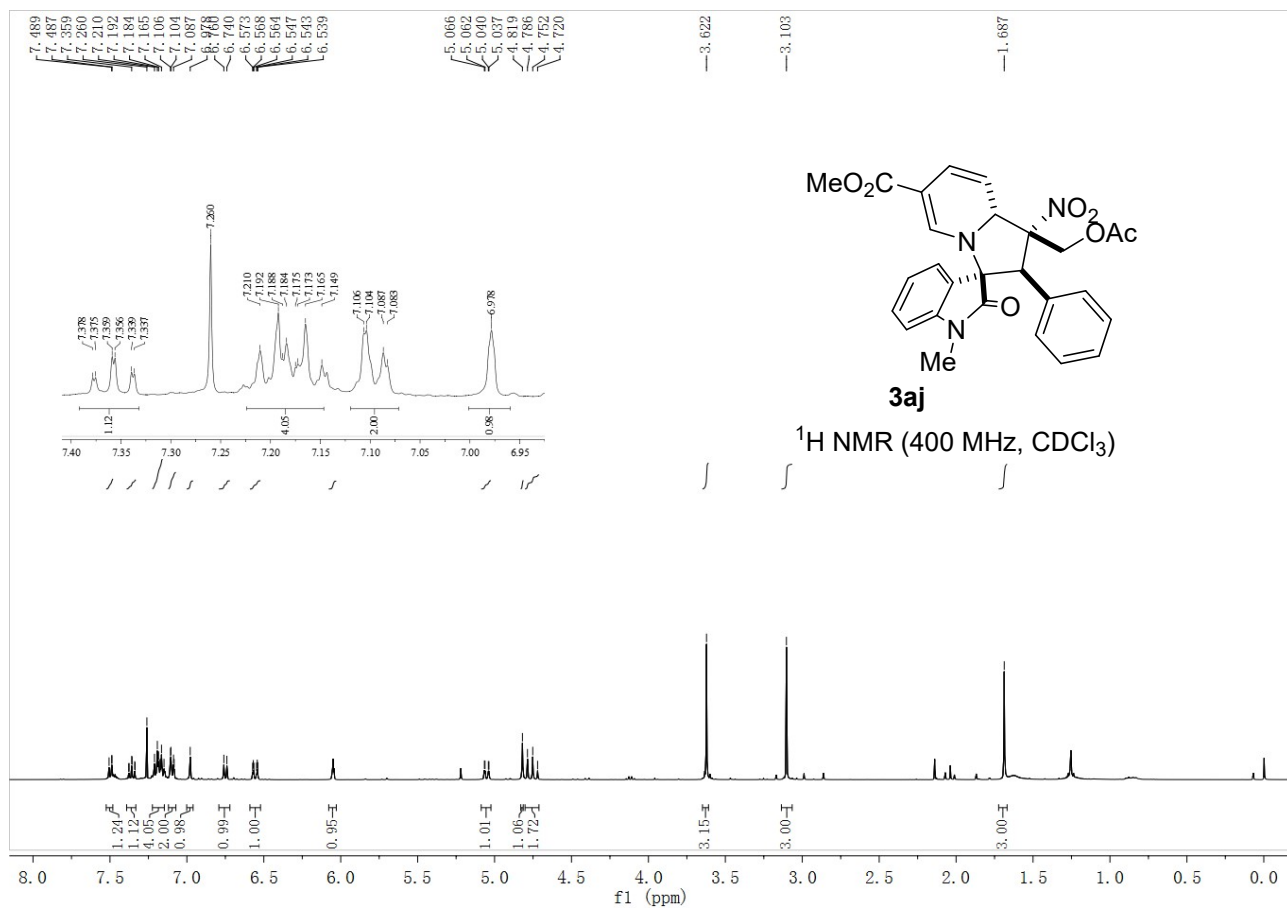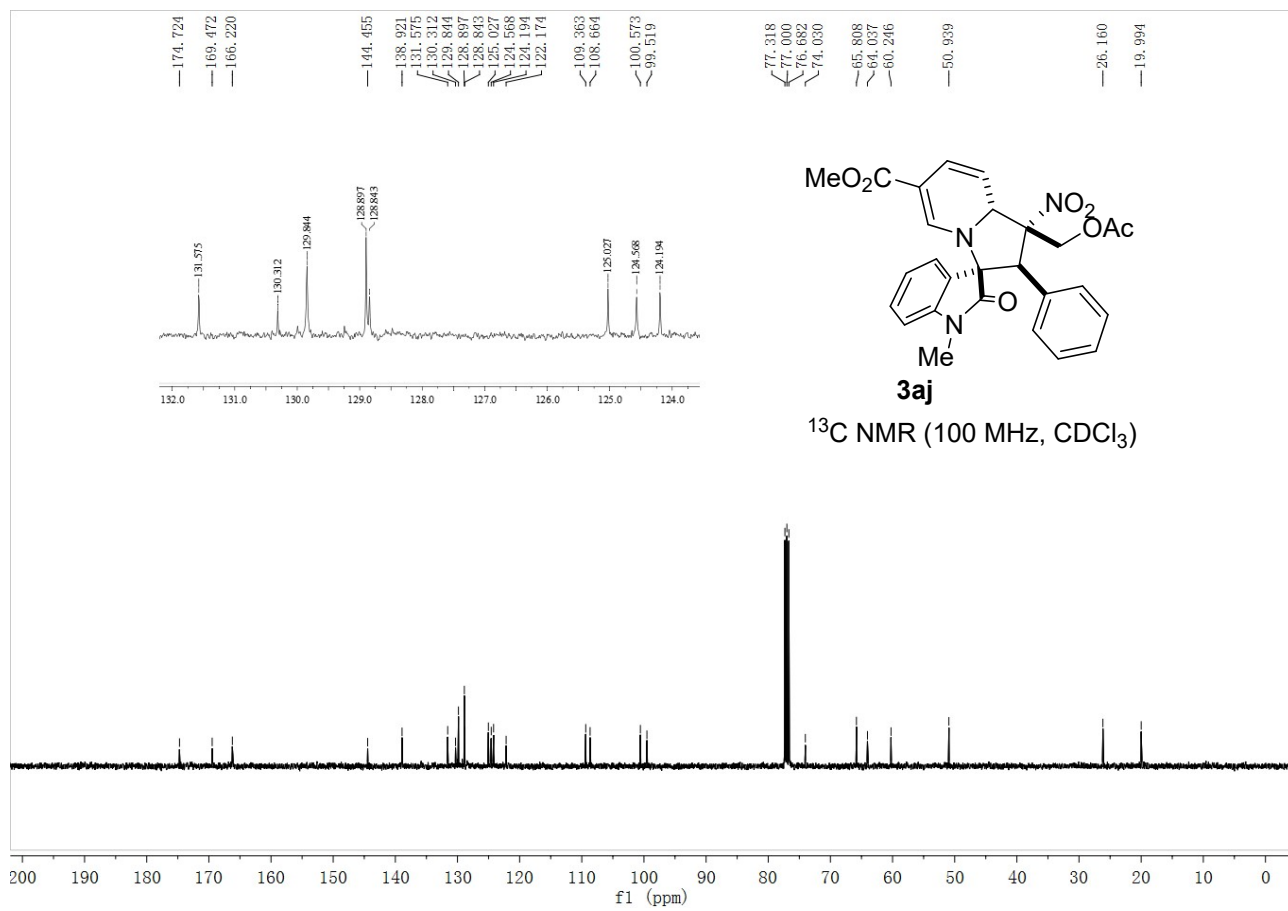



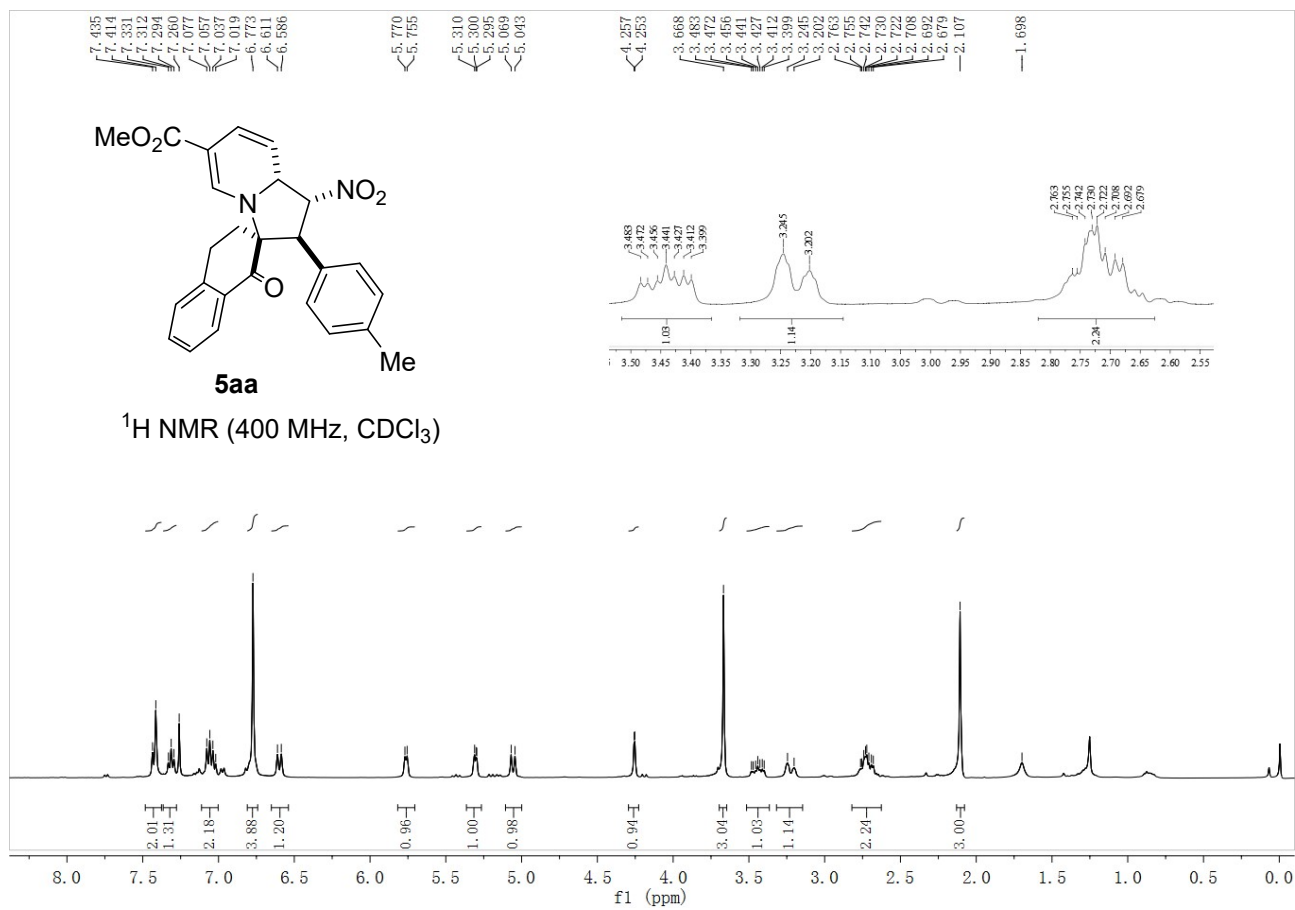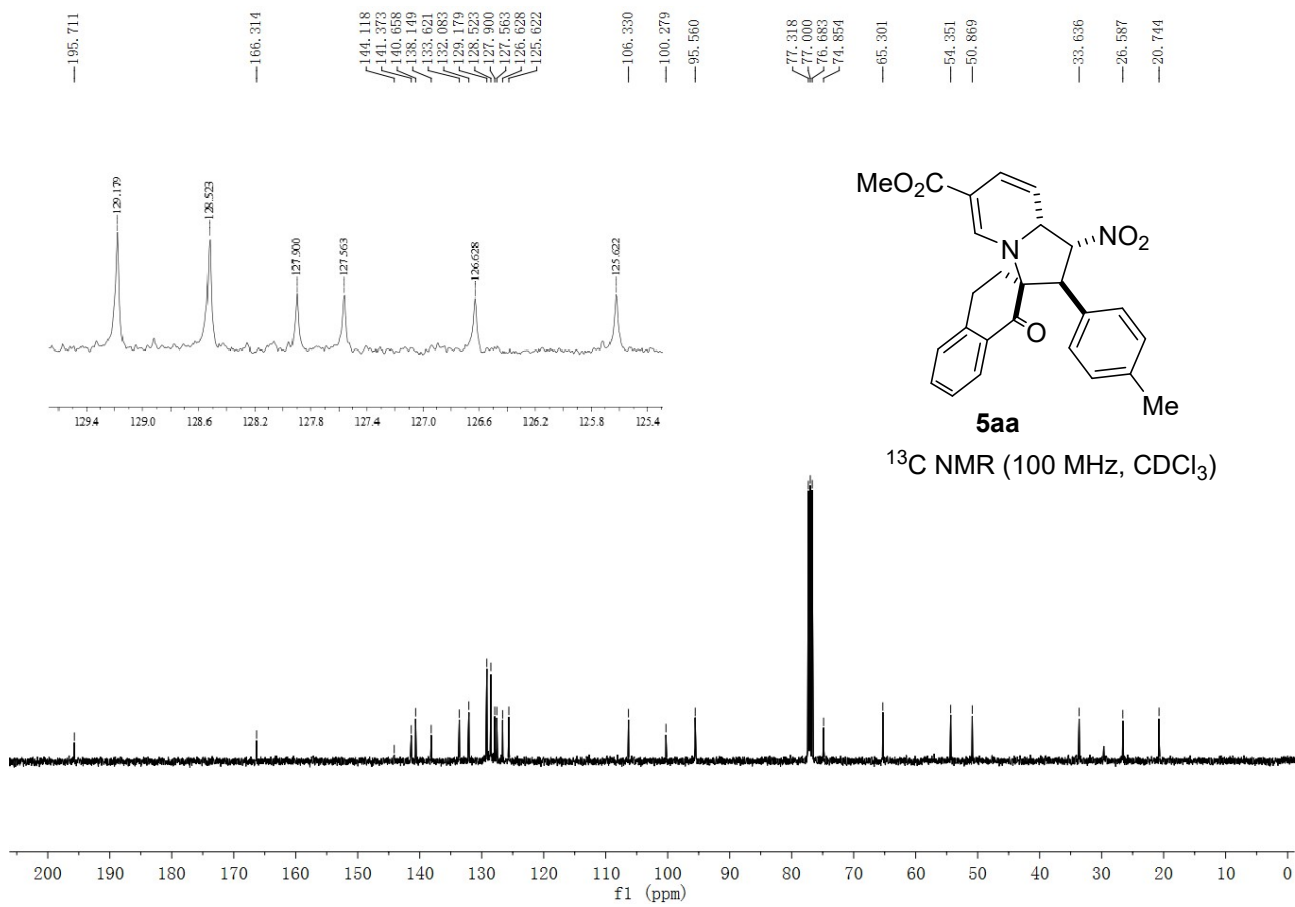

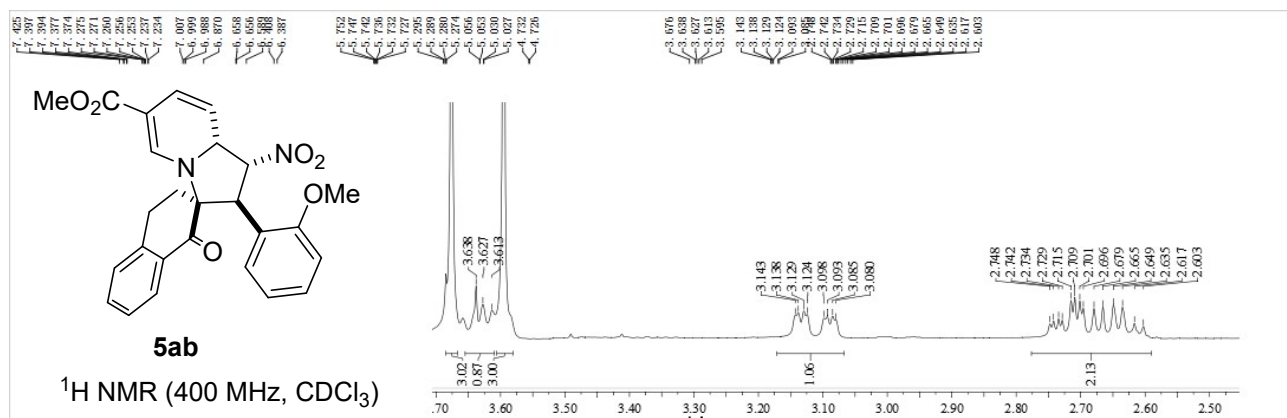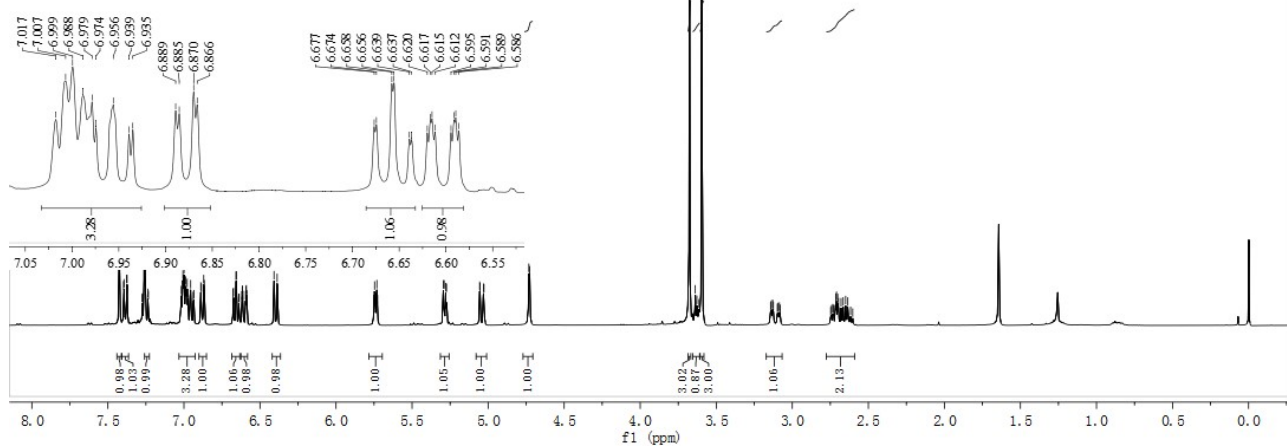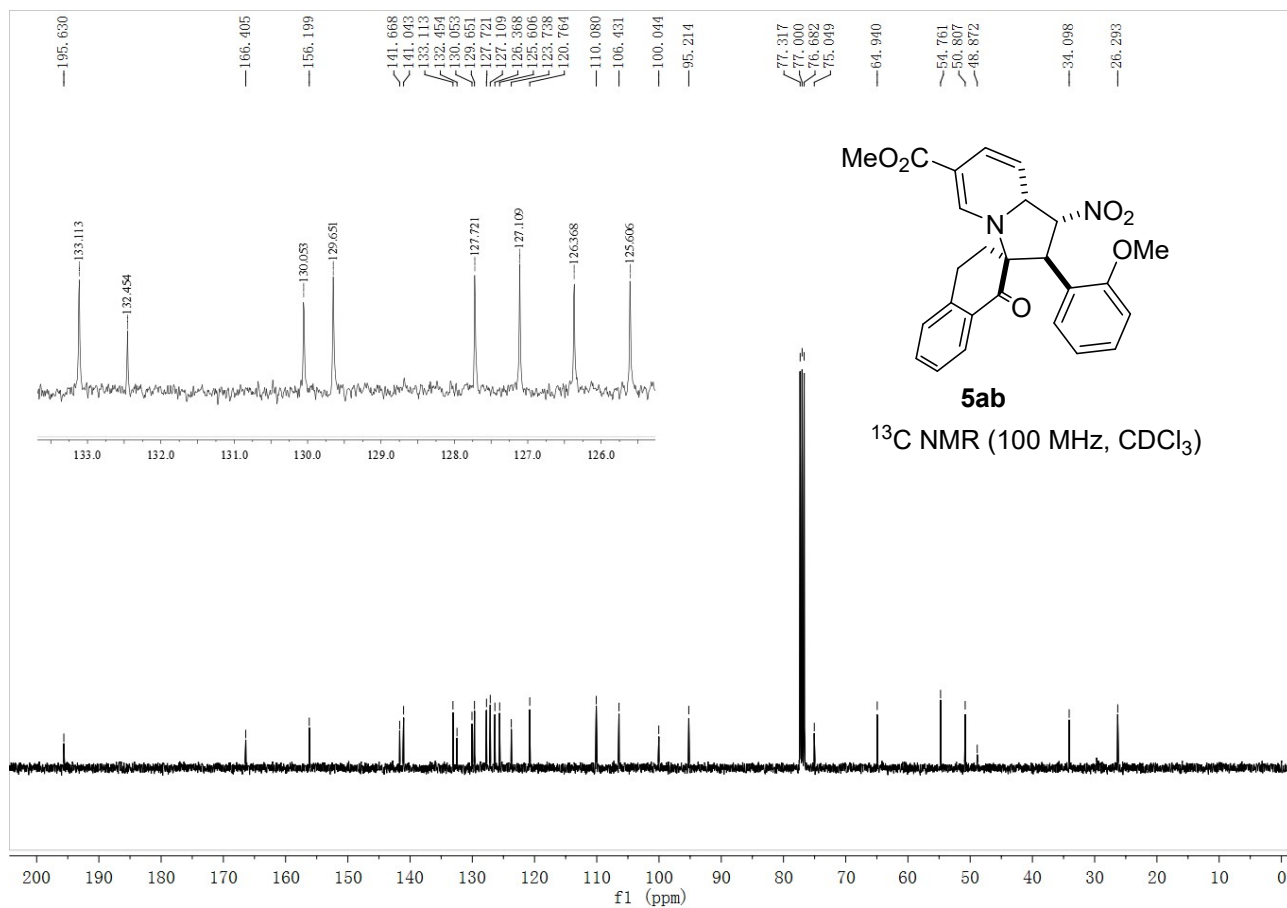

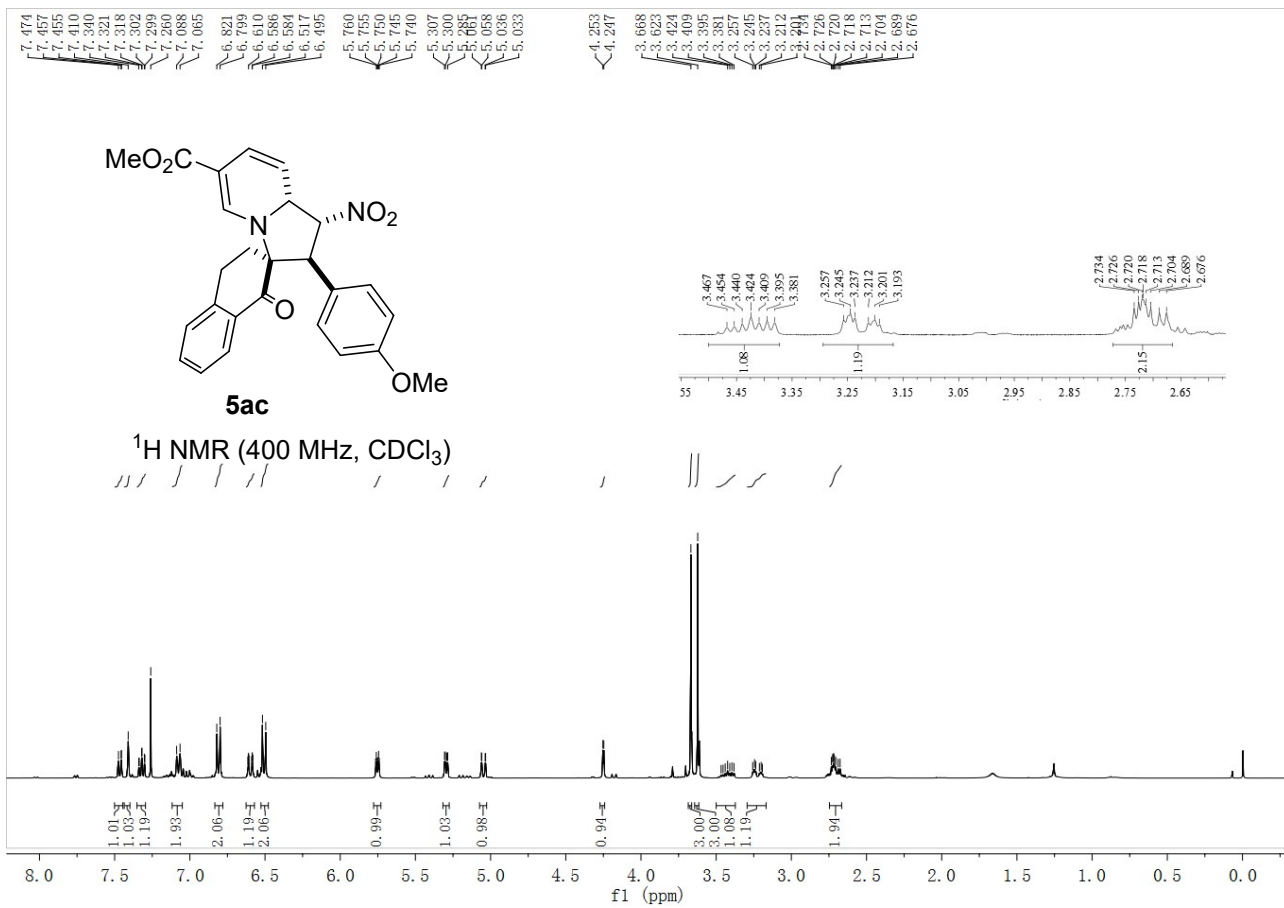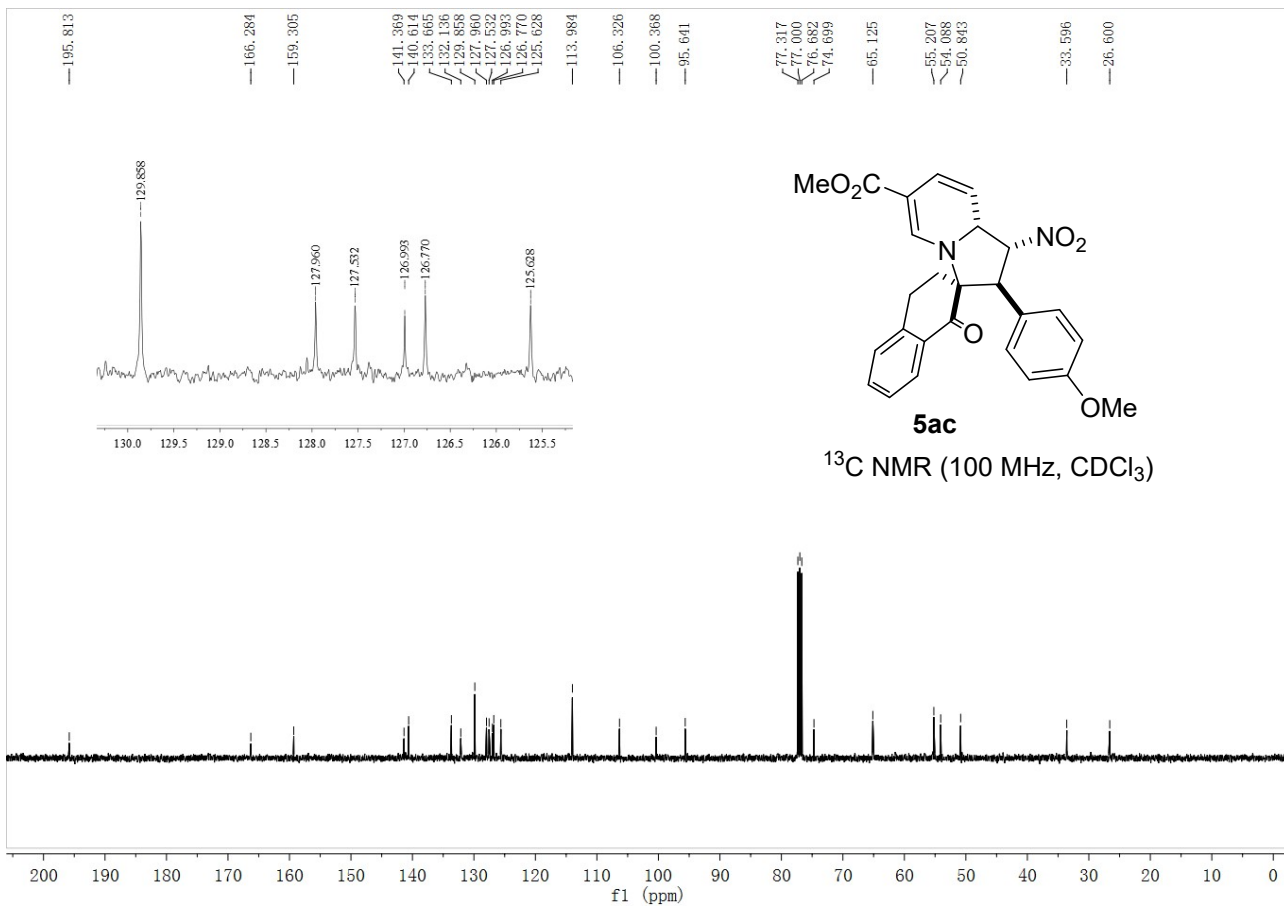

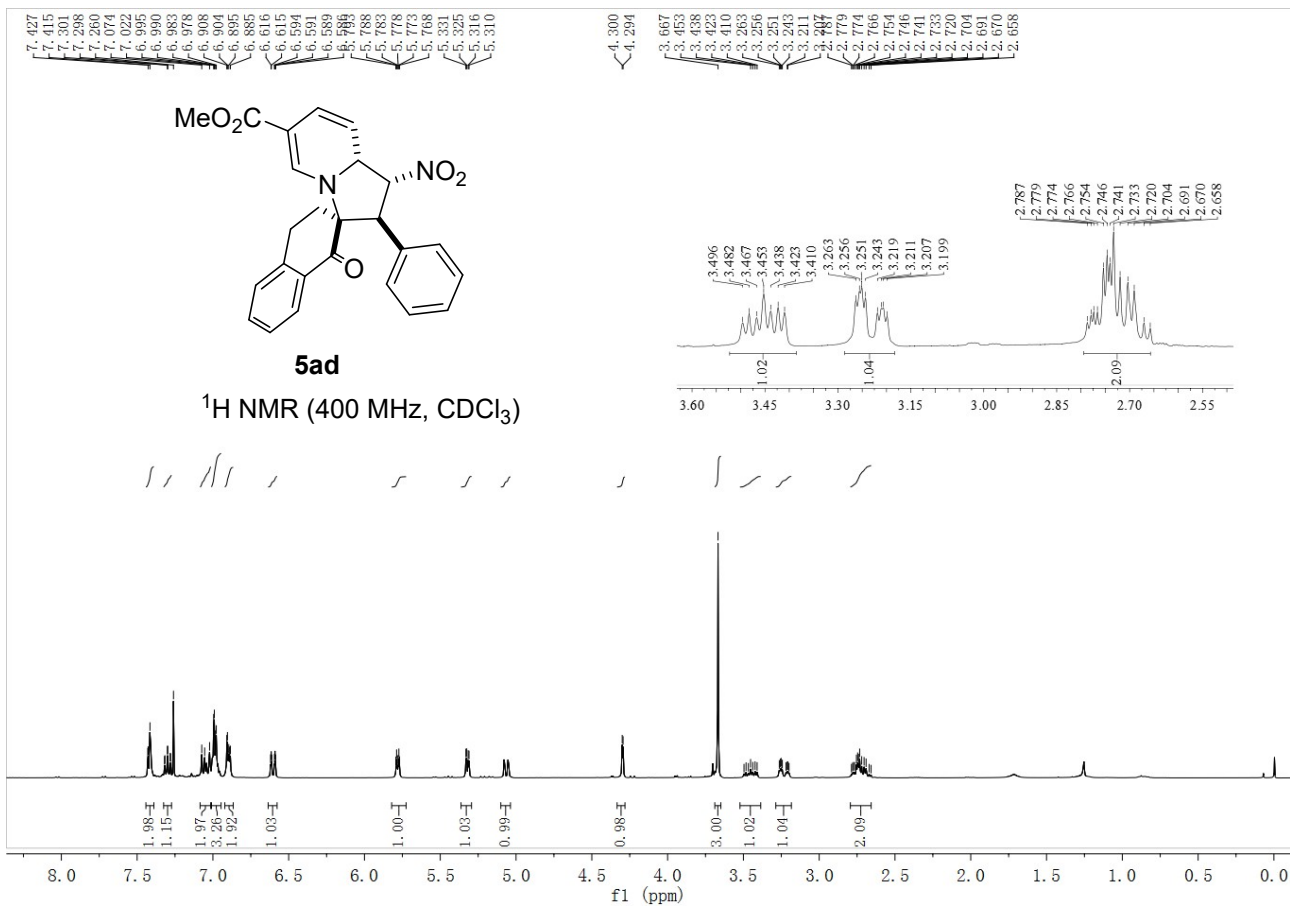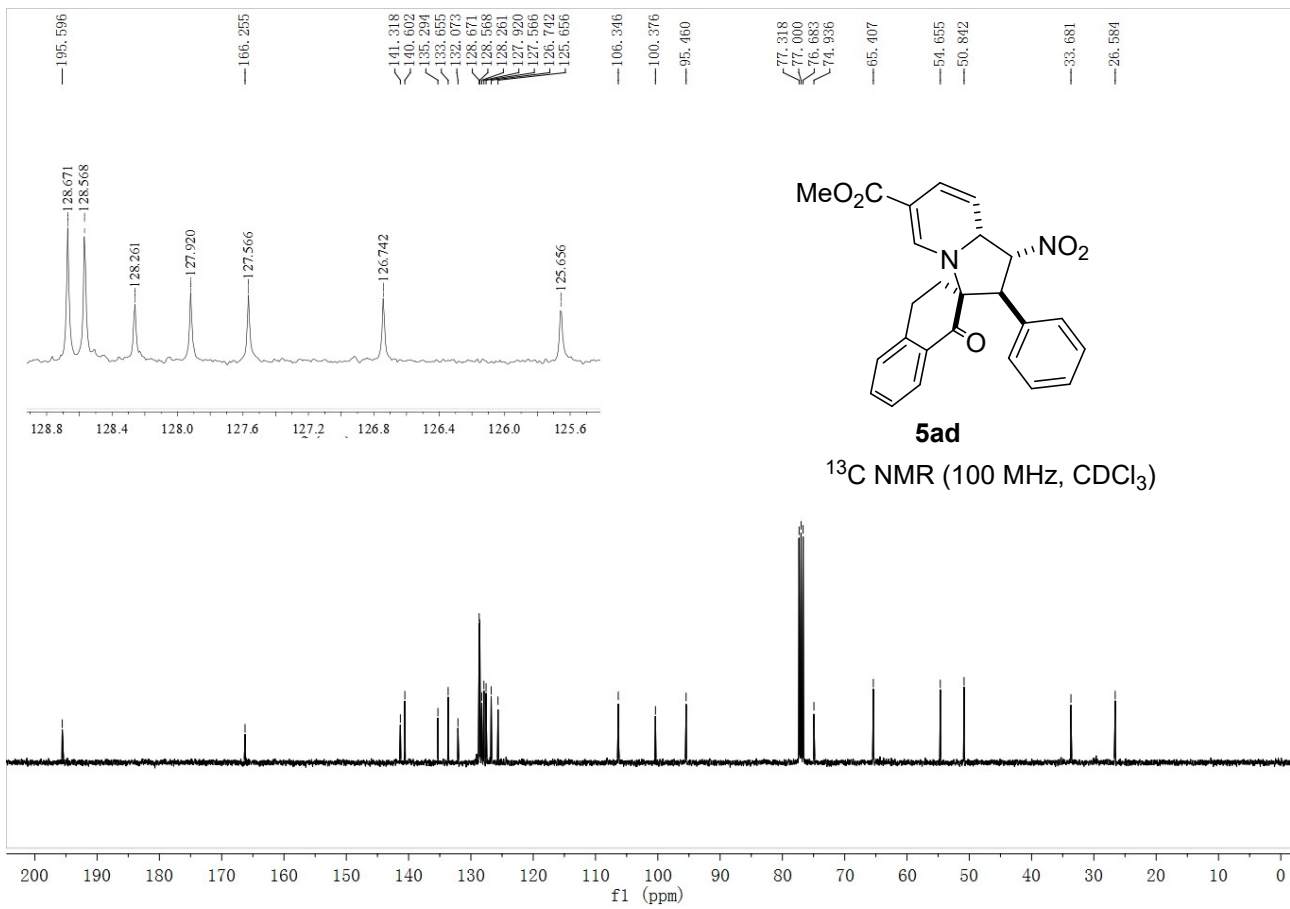

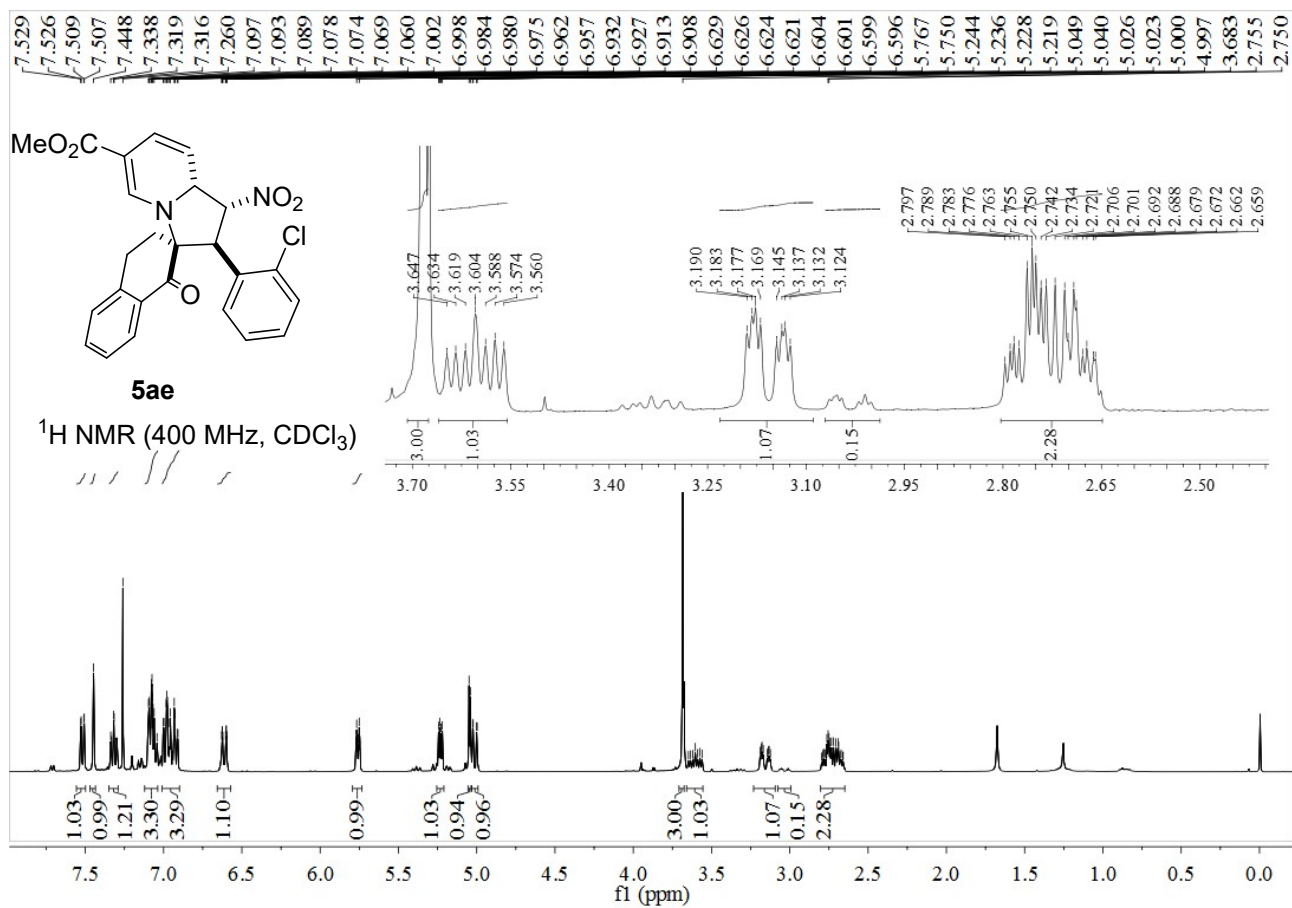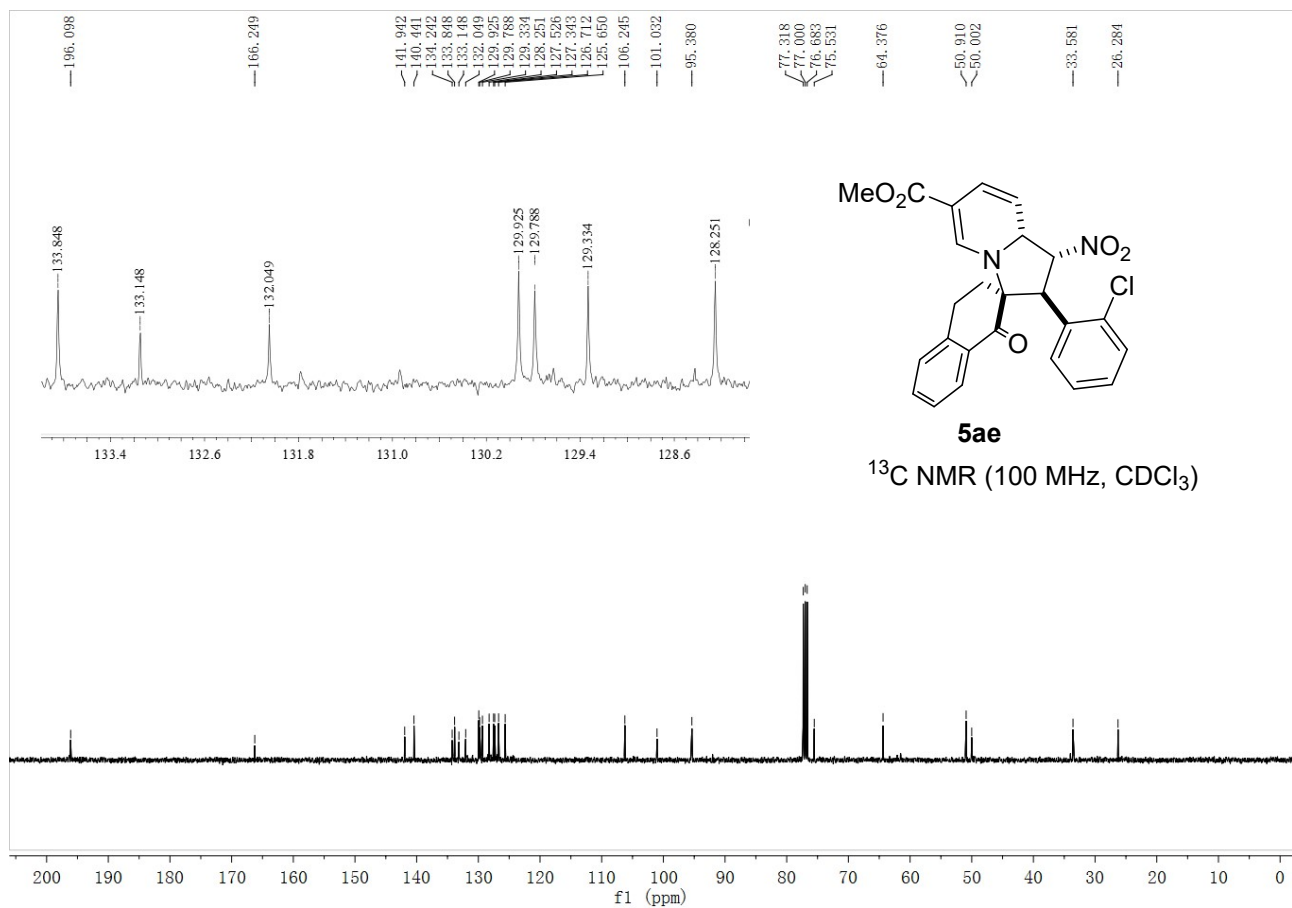

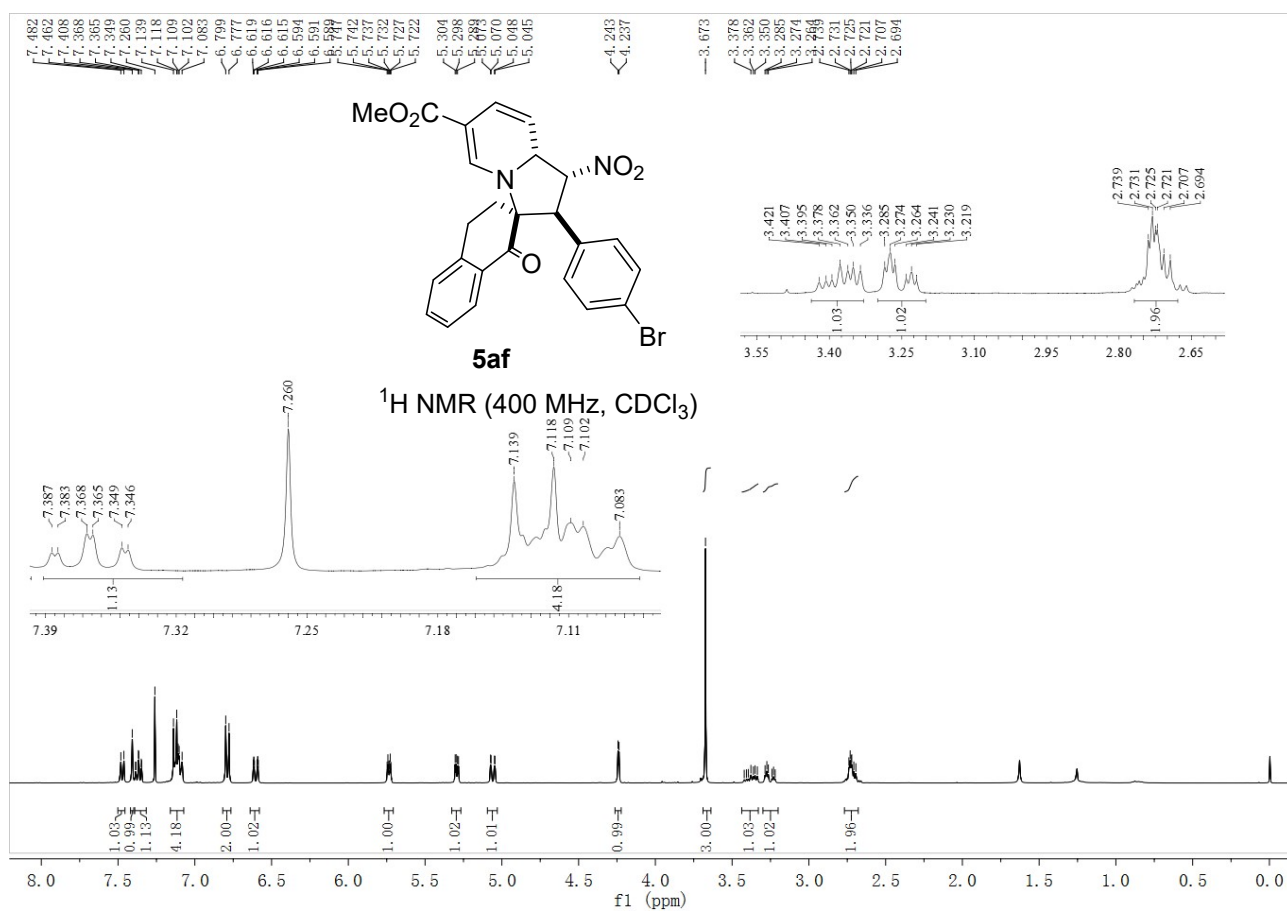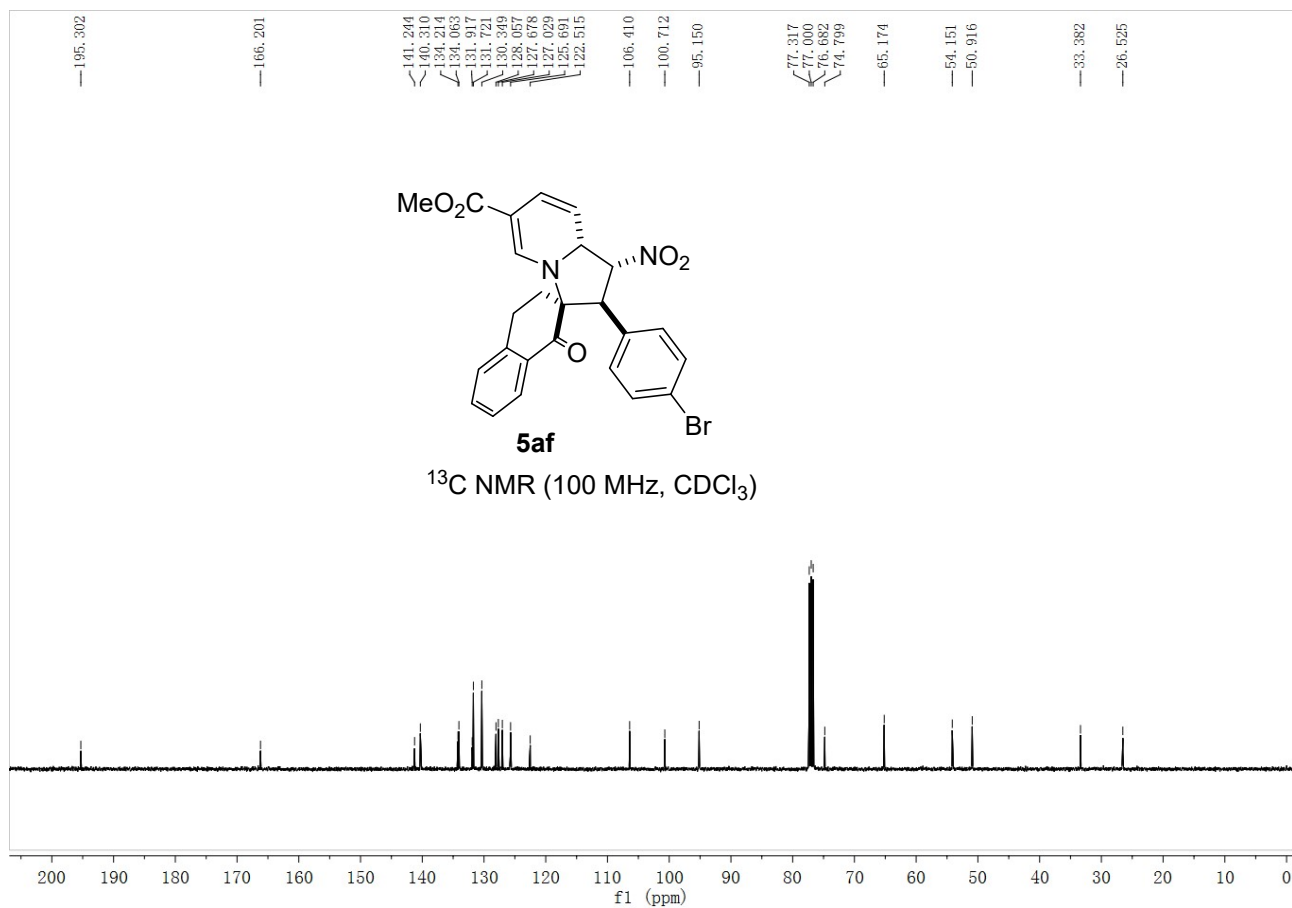

7.444  
7.424  
7.404  
7.372  
7.280  
6.970  
6.949  
6.821  
6.801  
6.728  
6.708  
6.683  
6.588  
5.734  
5.720  
5.296  
5.285  
5.090  
5.064

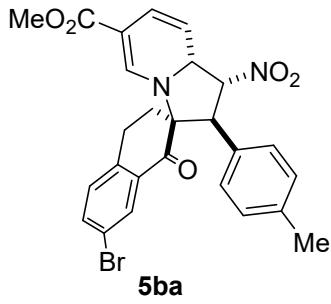

<sup>1</sup>H NMR (400 MHz, CDCl<sub>3</sub>)

4.241  
3.675  
3.380  
3.366  
3.349  
3.337  
3.218  
3.178  
2.767  
2.760  
2.739  
2.698  
2.685  
2.668  
2.655  
2.636  
2.623

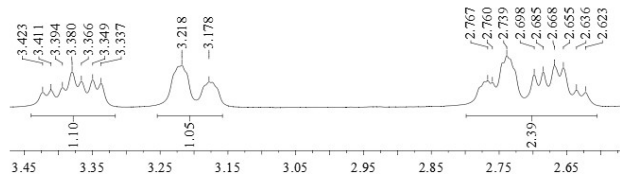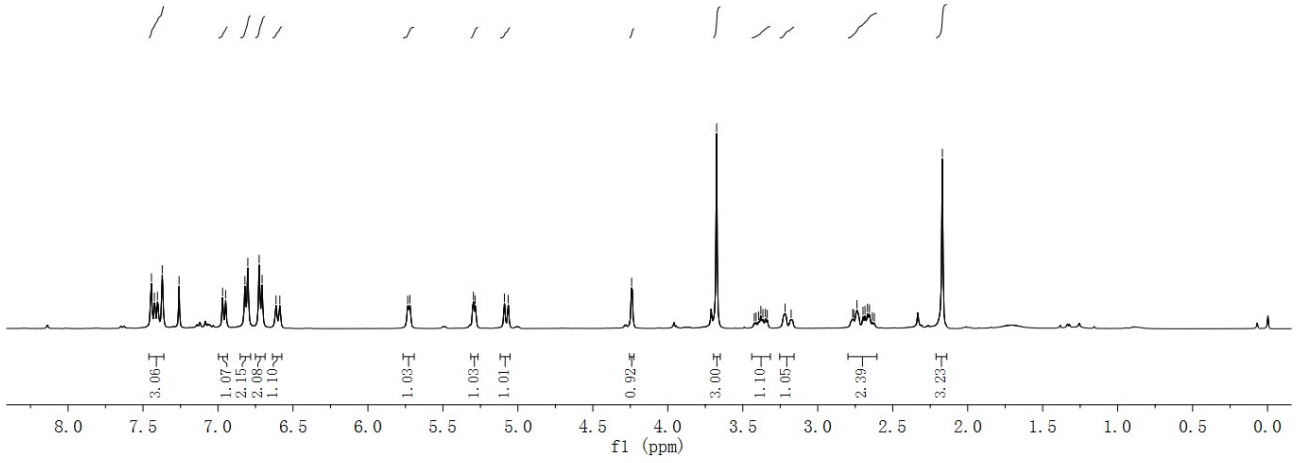

194.726  
166.235  
140.434  
139.913  
138.668  
136.170  
133.719  
131.677  
131.127  
129.600  
129.318  
128.480  
128.480  
125.684  
120.696  
106.479  
100.592  
95.319  
77.317  
77.000  
76.682  
74.830  
65.484  
54.077  
50.903  
33.231  
26.241  
20.801

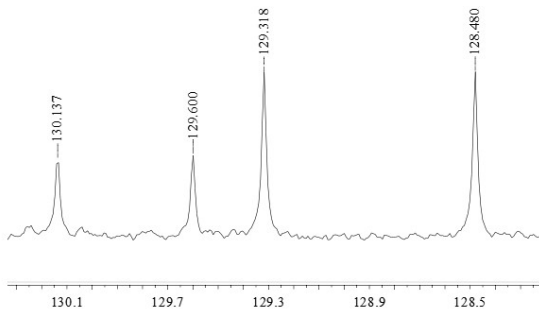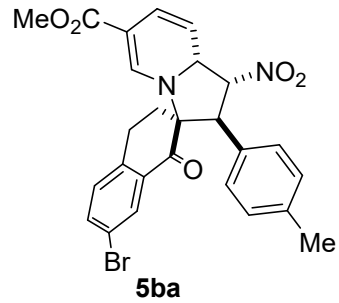

<sup>13</sup>C NMR (100 MHz, CDCl<sub>3</sub>)

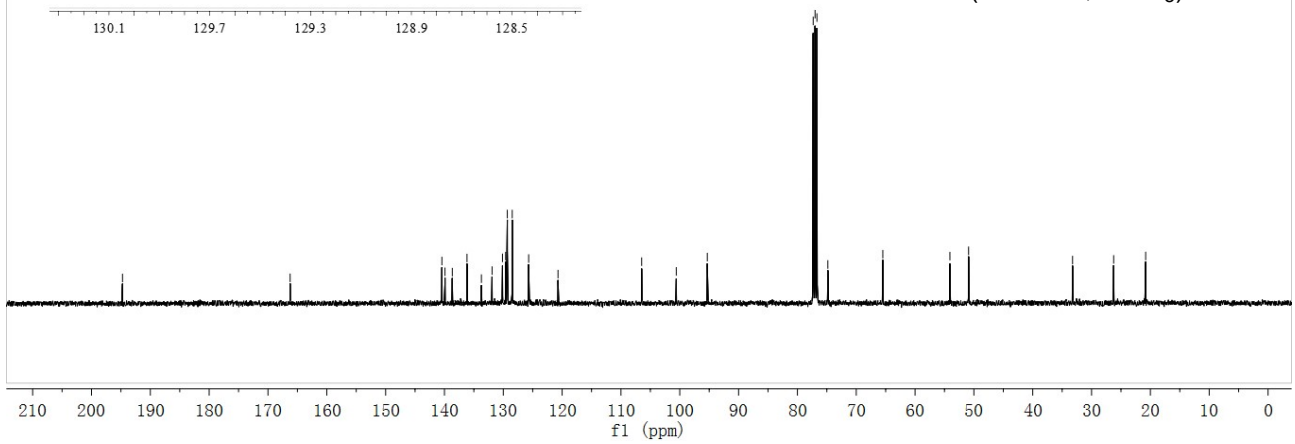

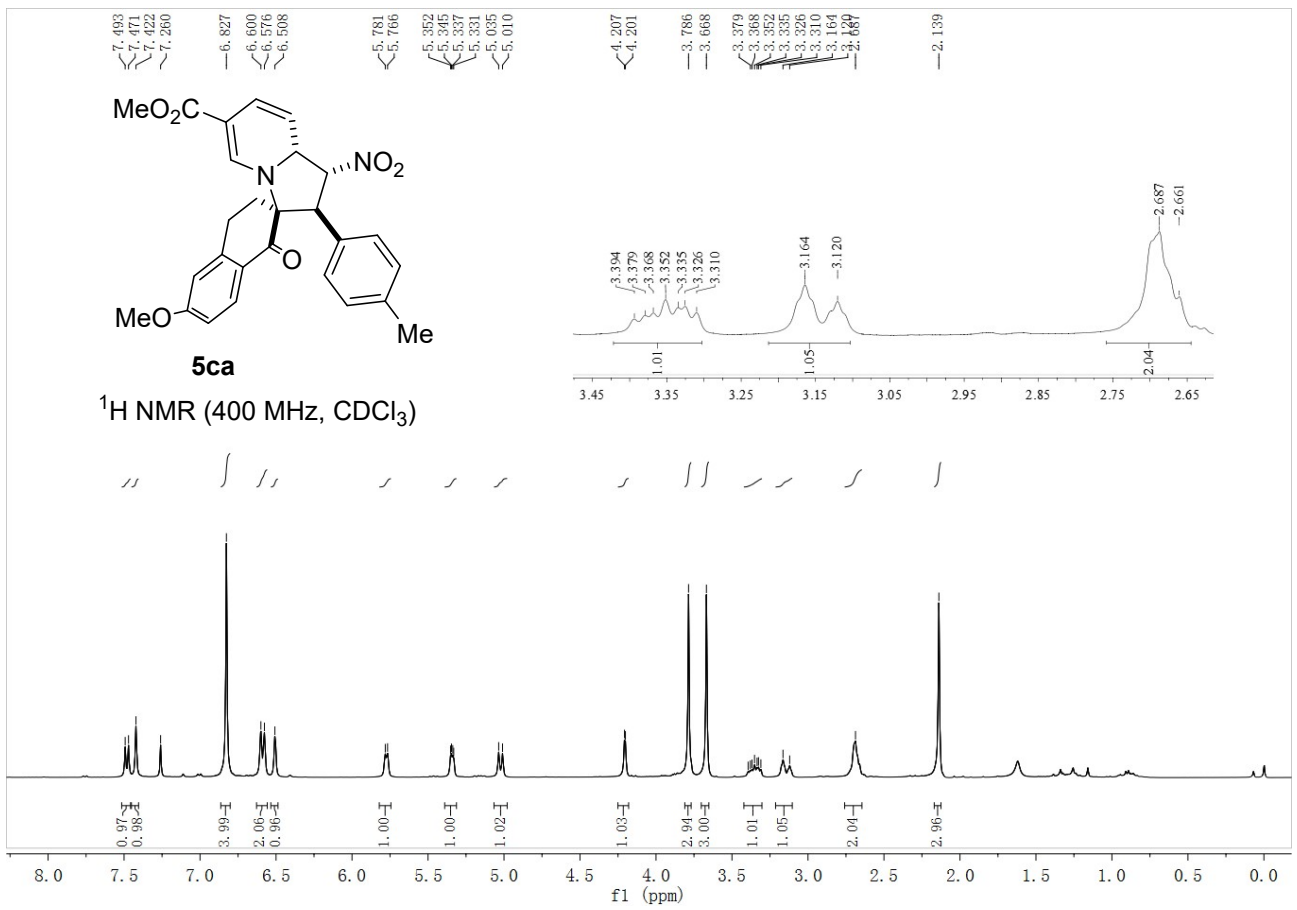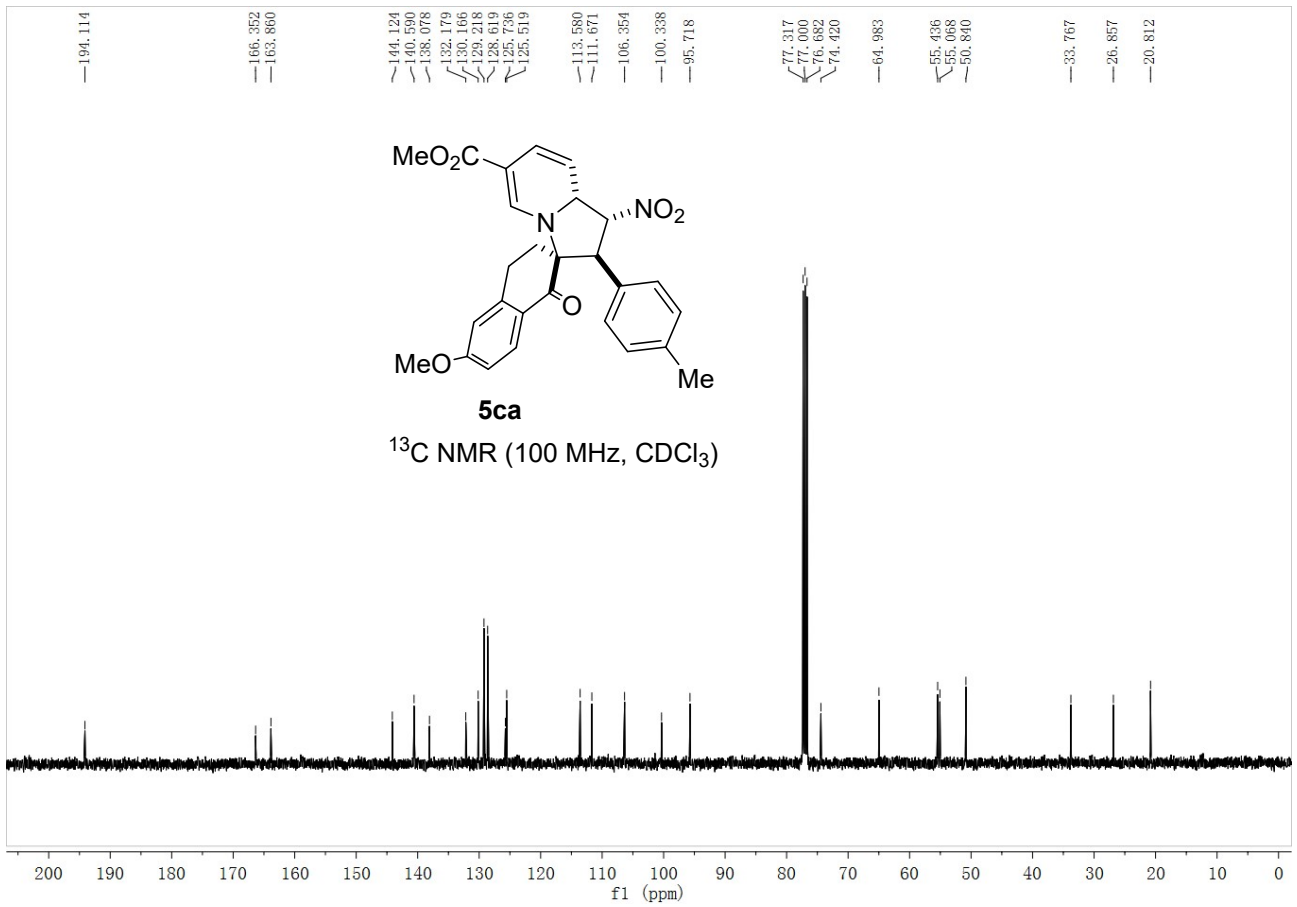



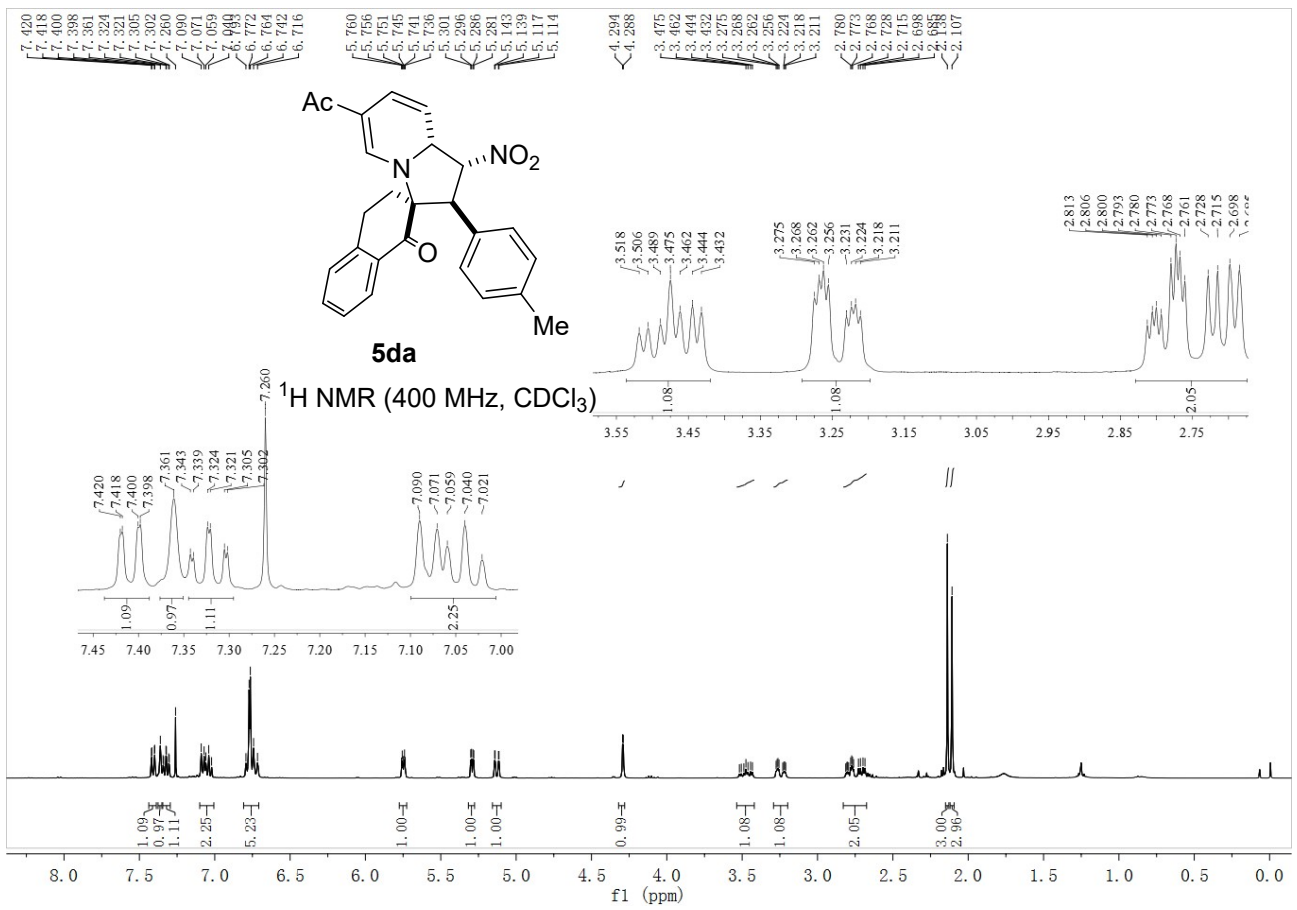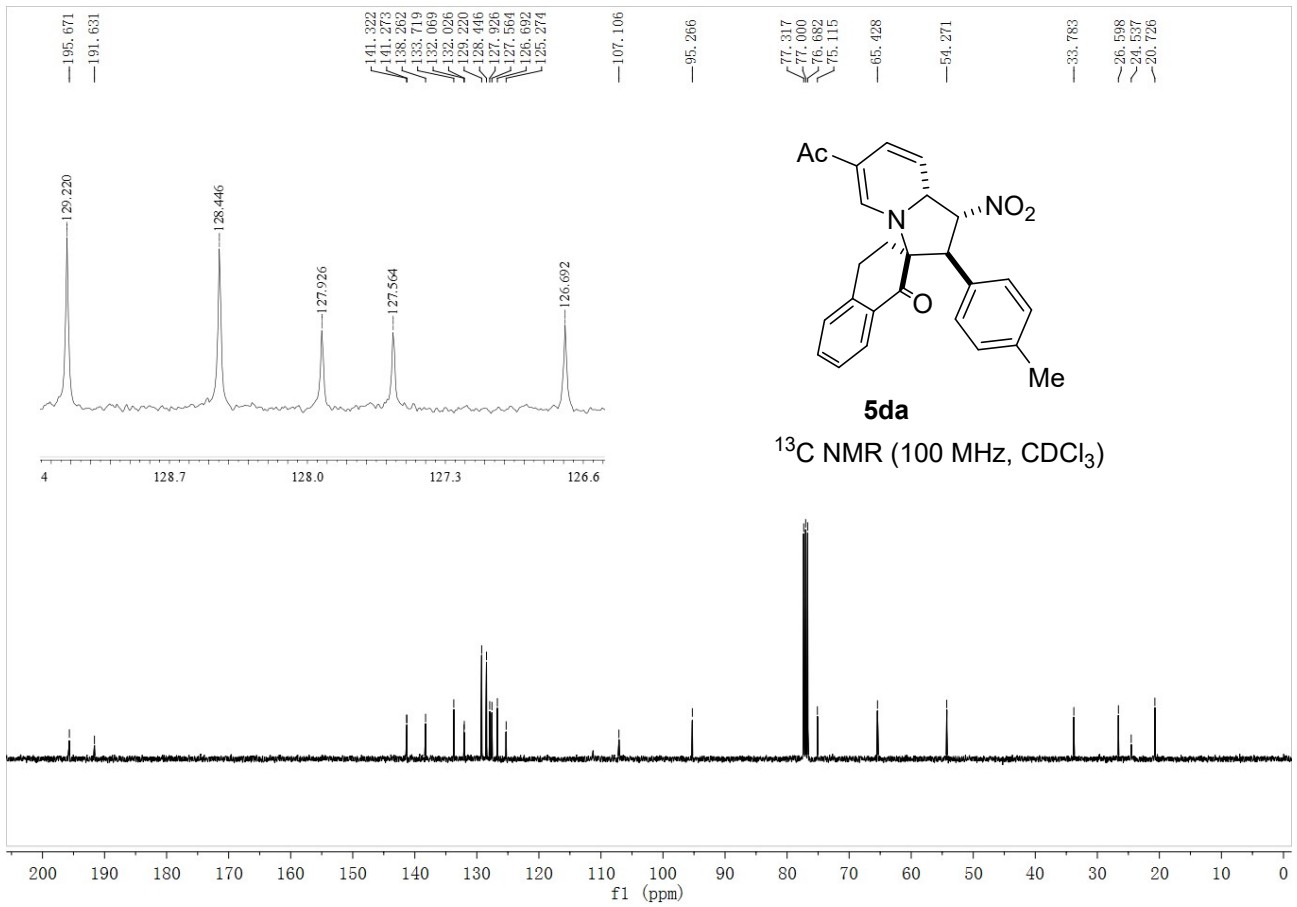

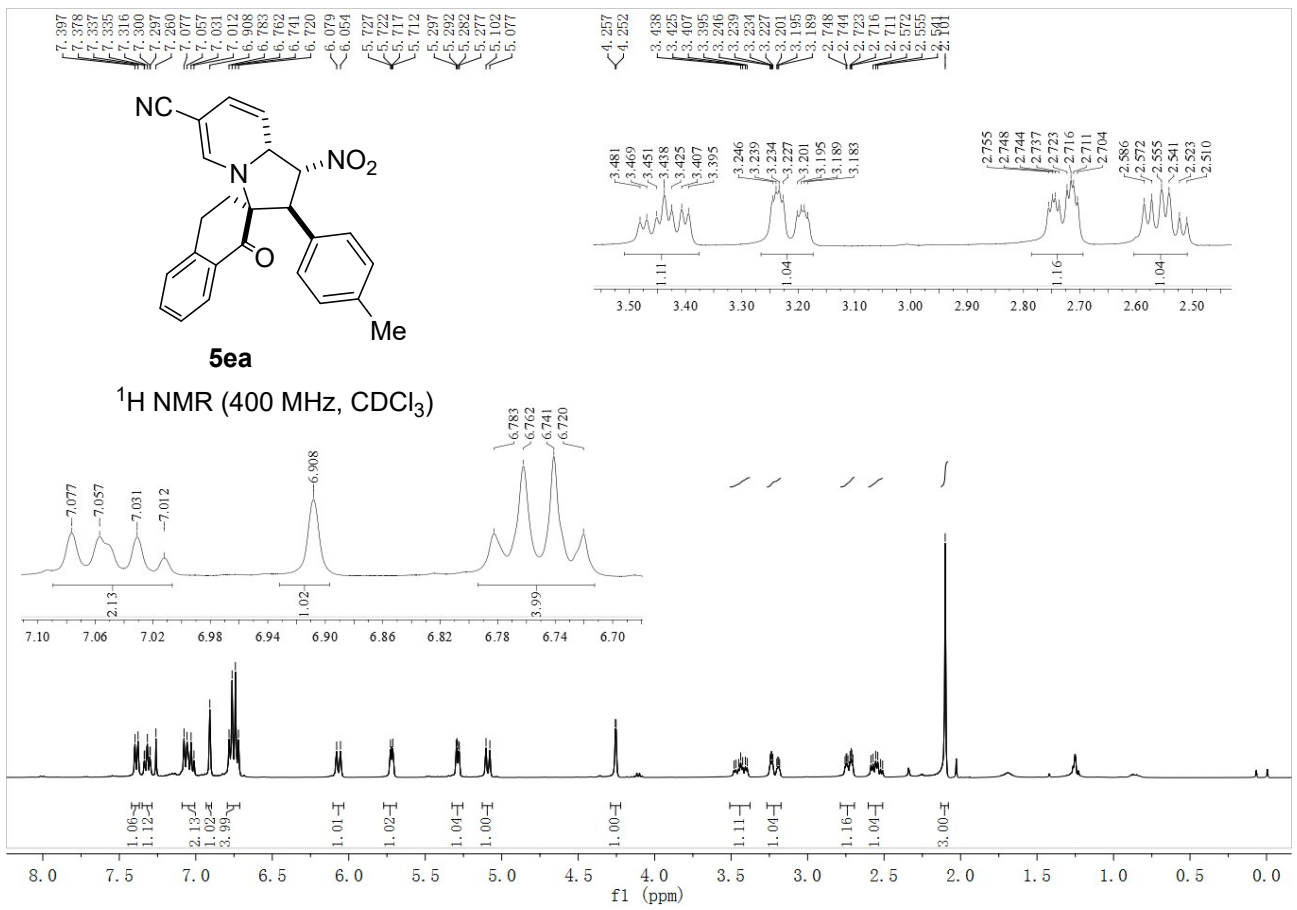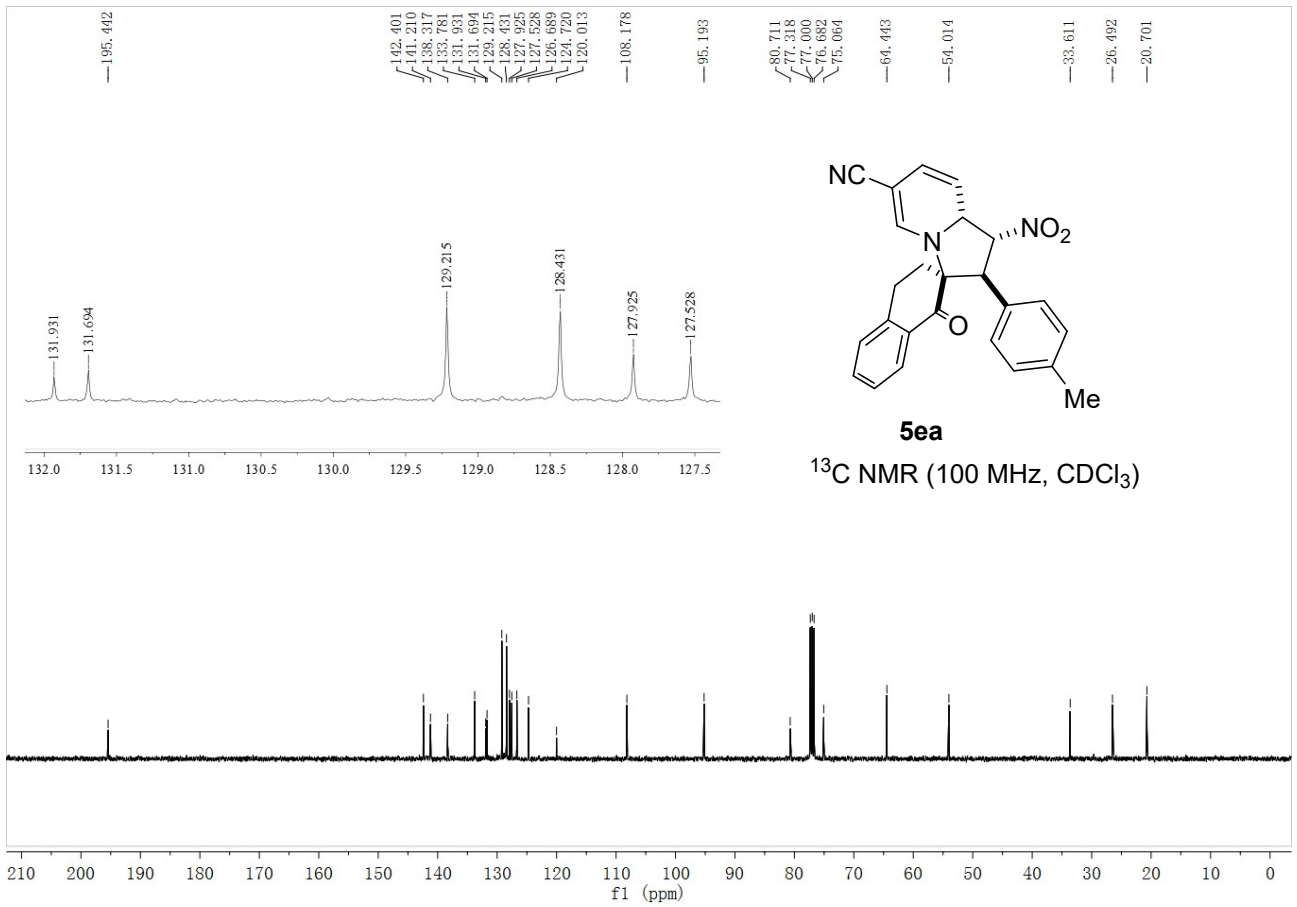

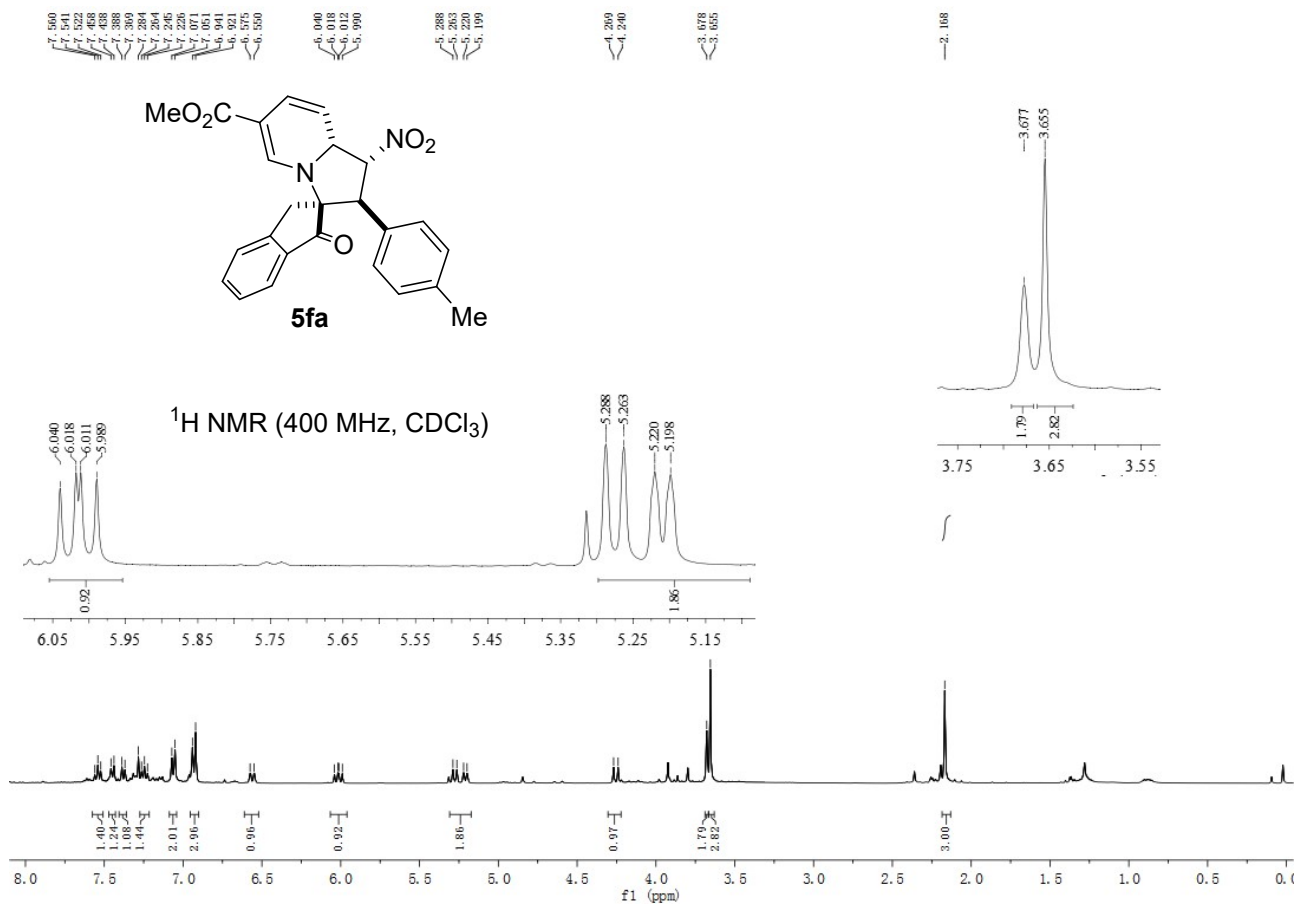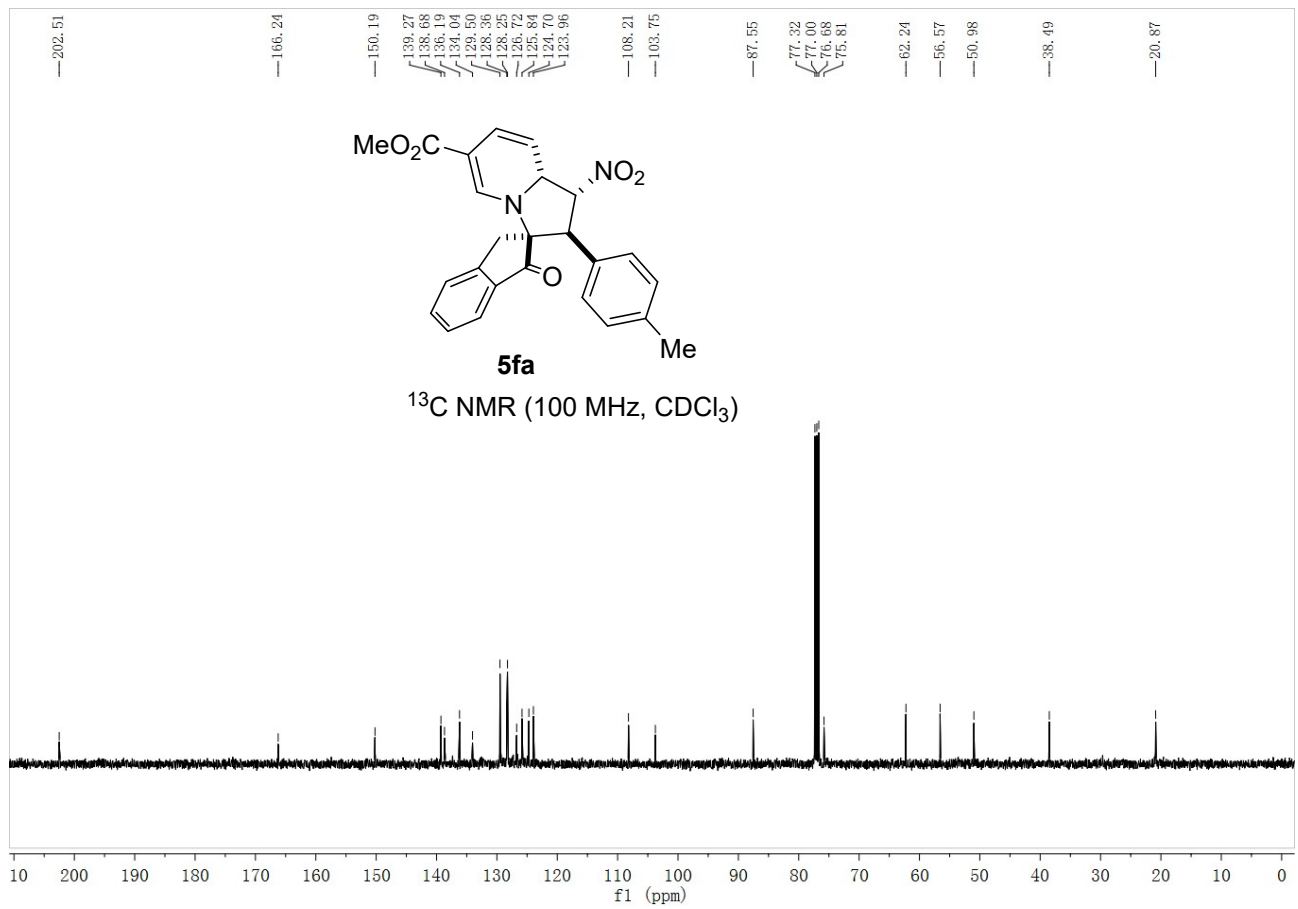

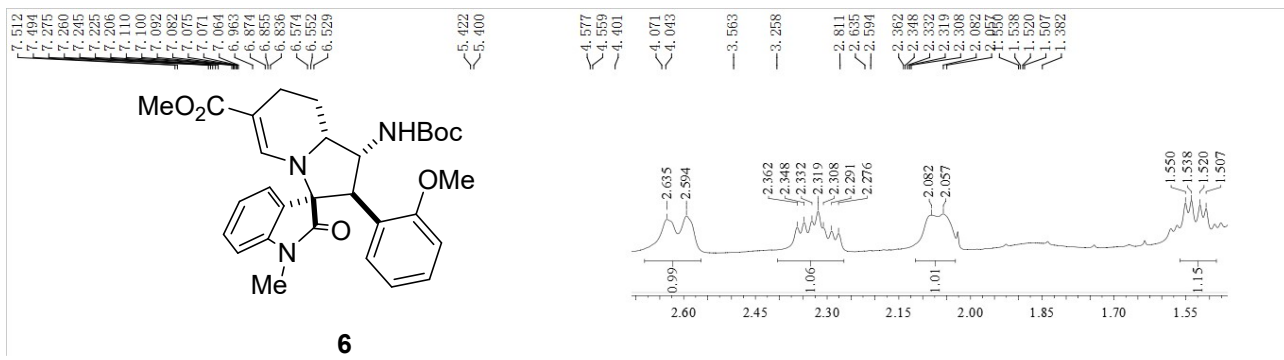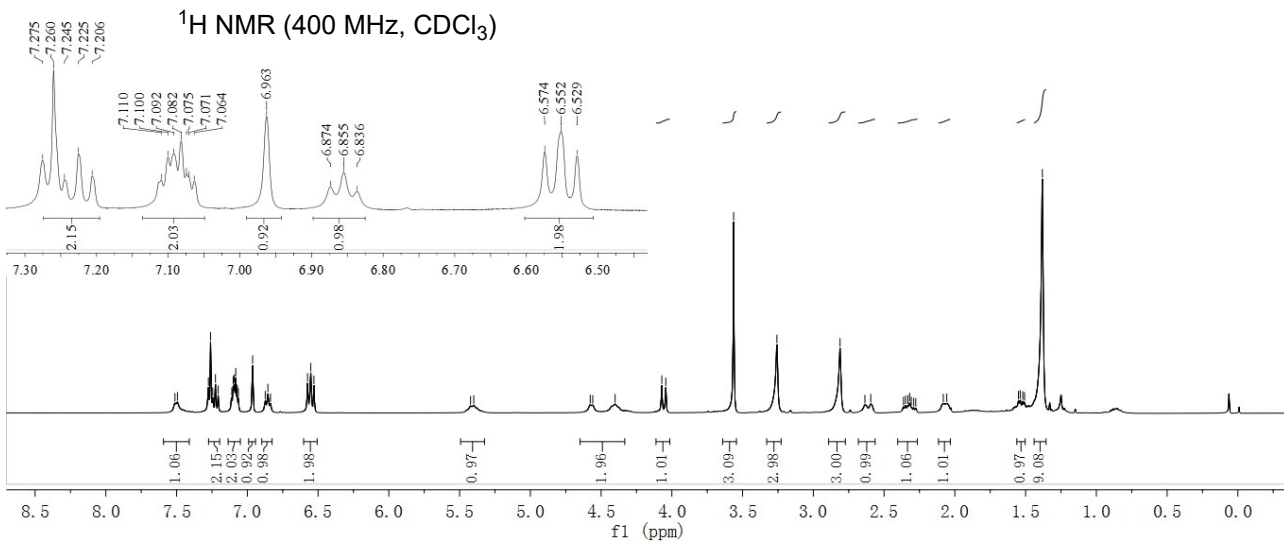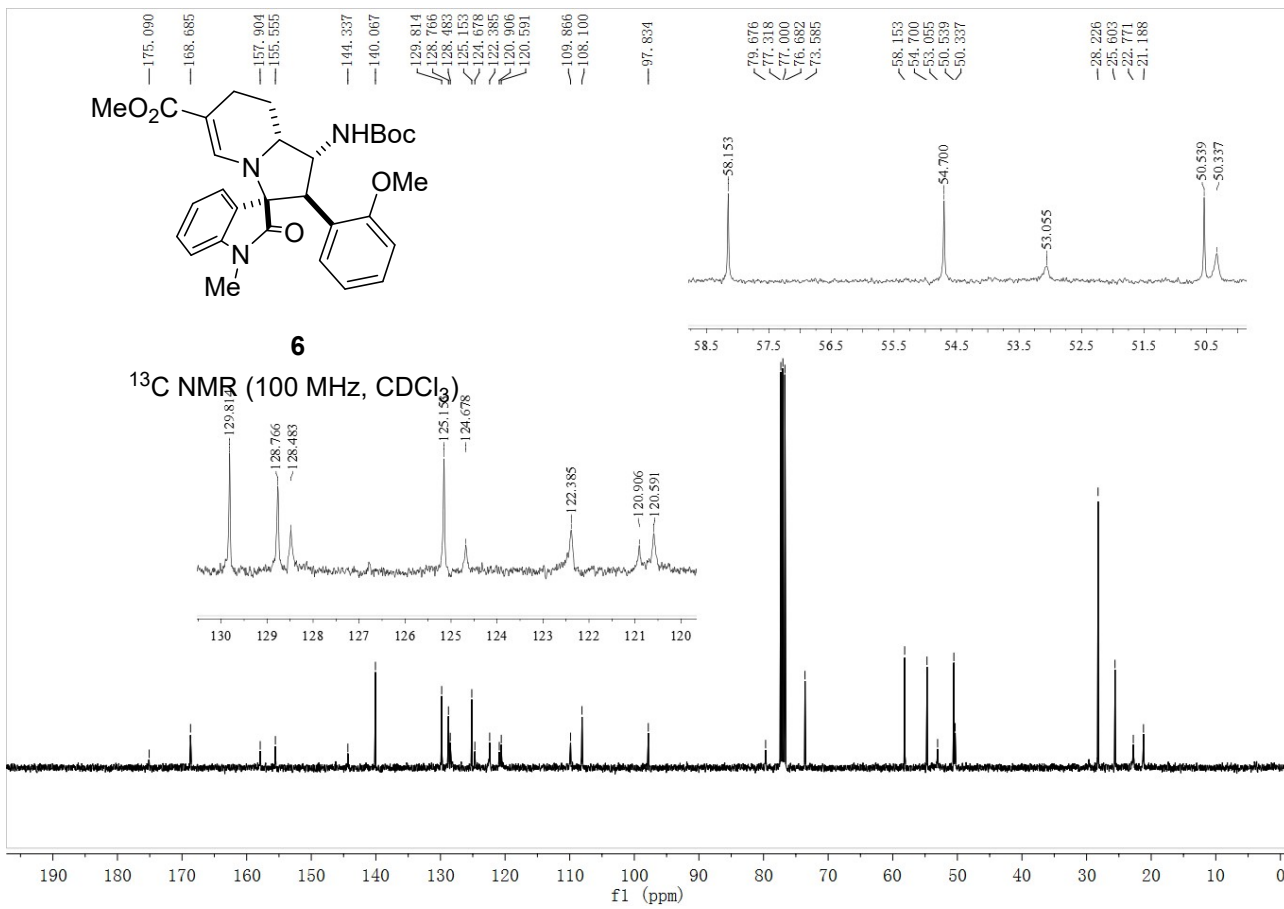

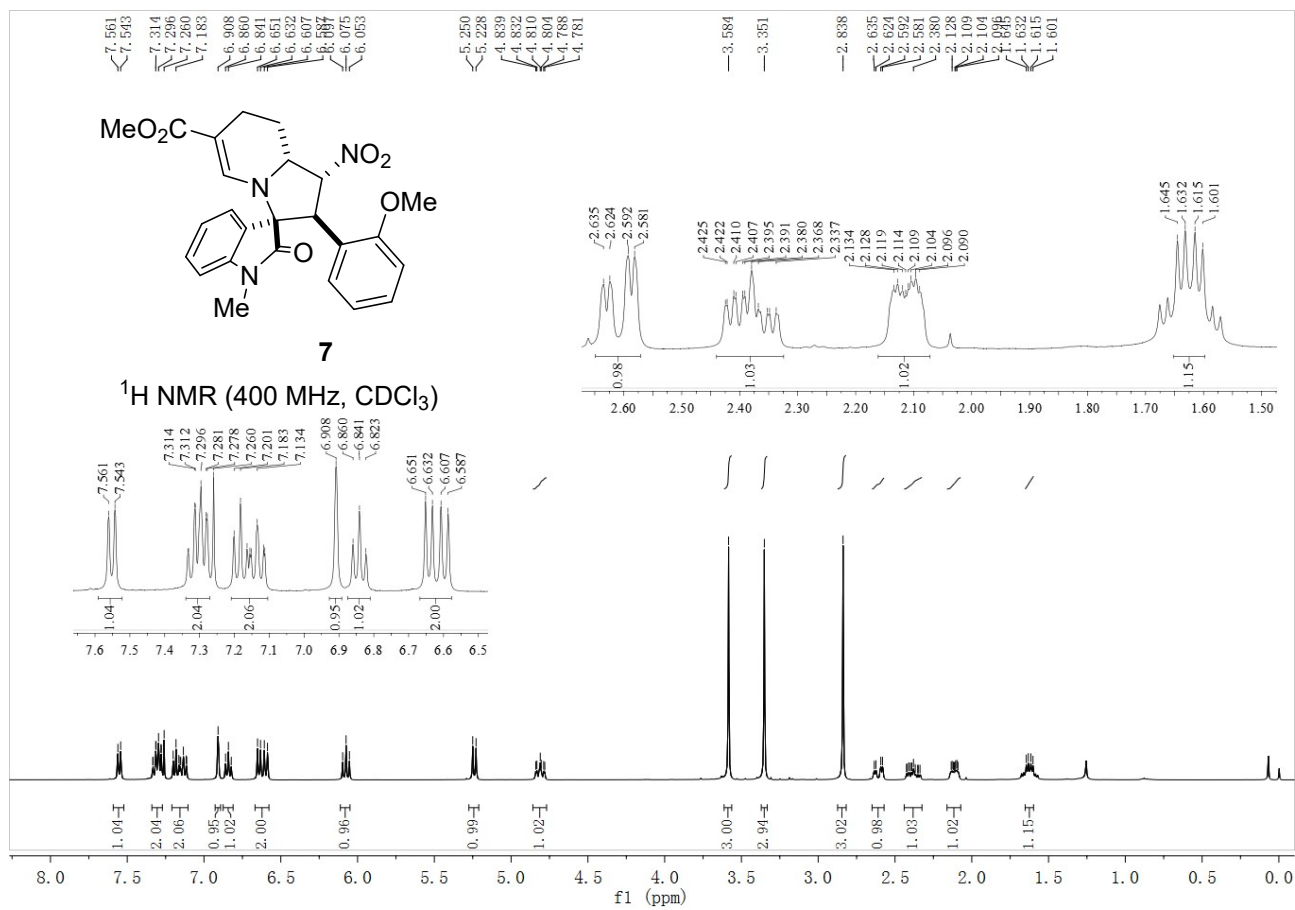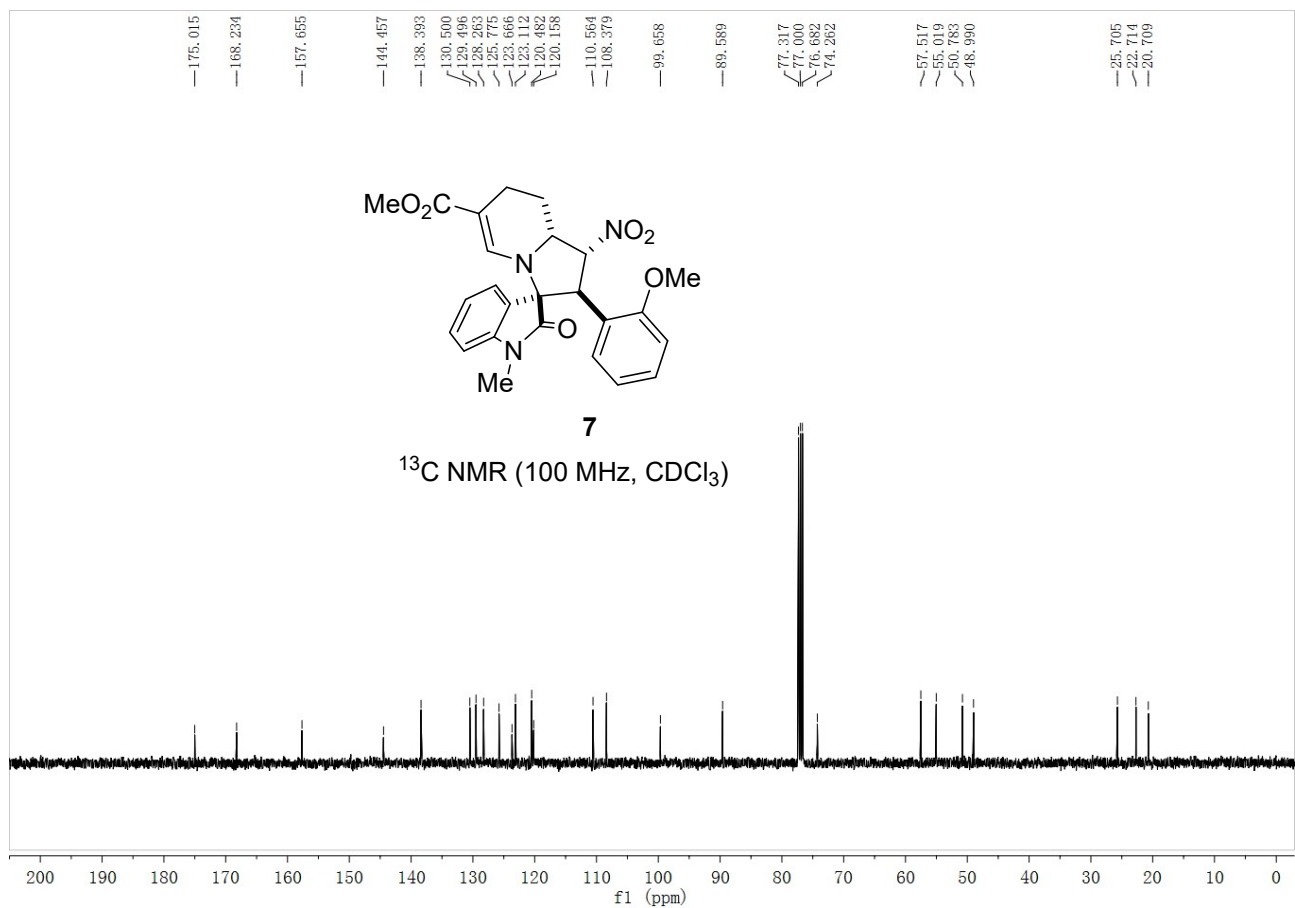

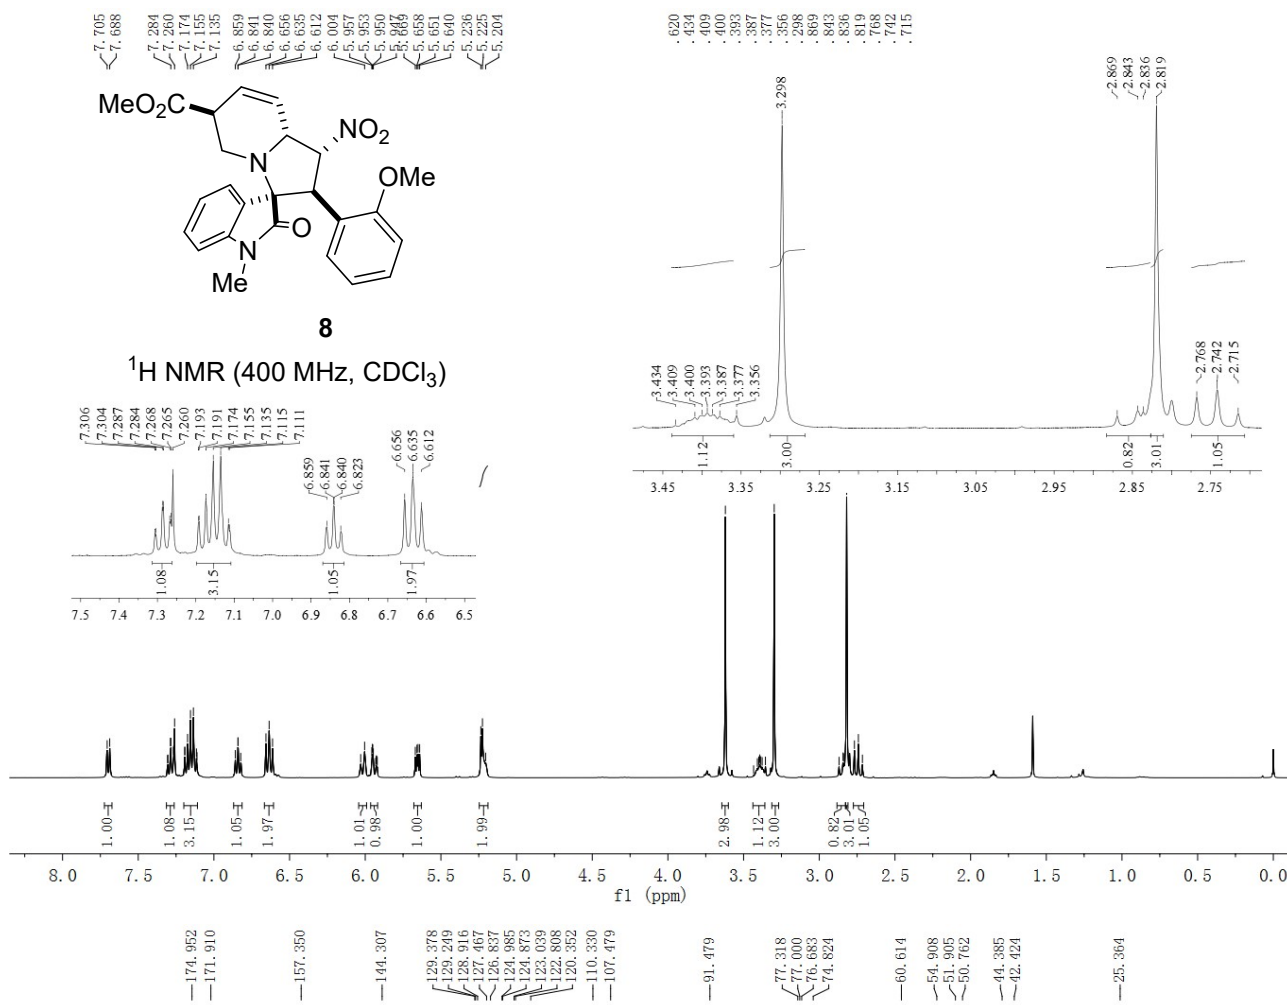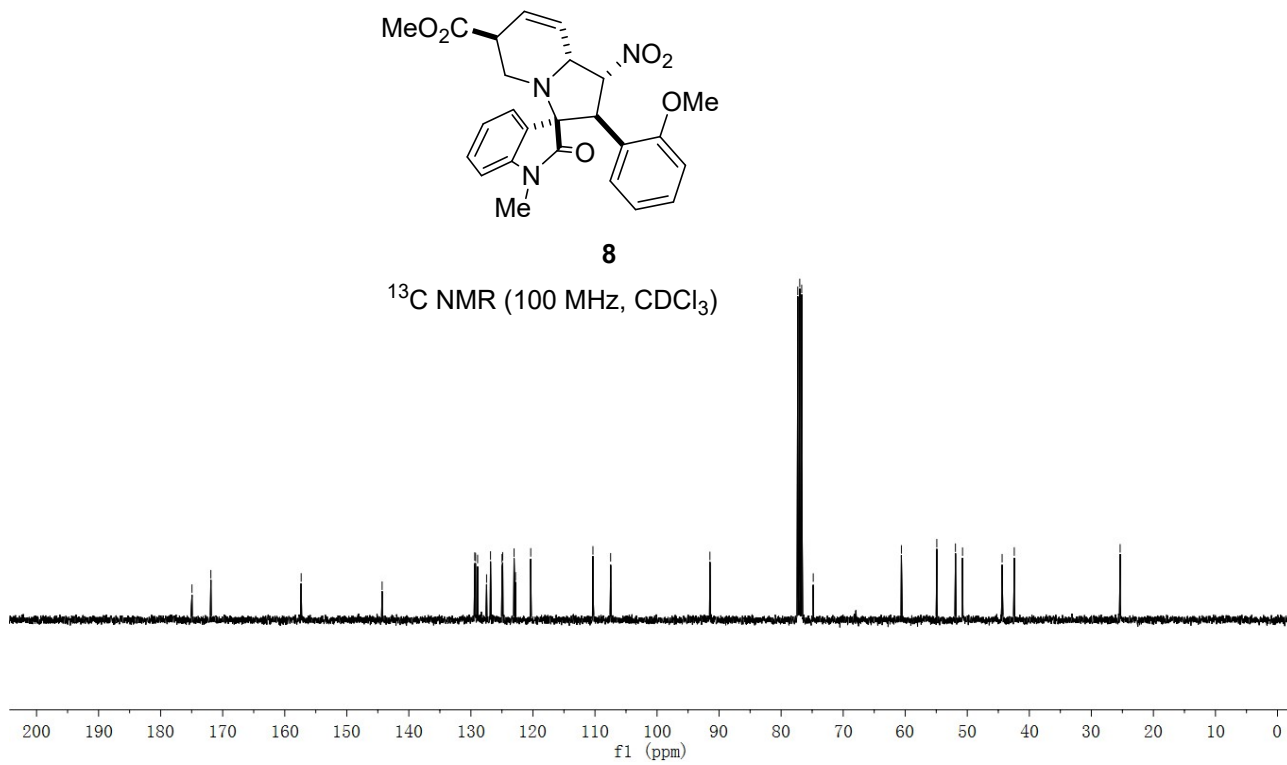

Supplement: d1qo00886b1.pdf [file d1qo00886b1.pdf]
